# Supplementary material
Source: publisher figshare collection journal article supplement (https://gsajournals.figshare.com/ndownloader/files/18161729)
Supplement: Supplementary file 1 [file 18161729]

## Sheet: Across locations
Family	ADF	NDF	DOMD	Cfat	ME	CP	N	Ca	K	Mg	Mn	Na	P	S	Tetany ratio (K/(Ca+Mg)	LMW_WSC	HMW_WSC	Total_WSC
1001	23.71	43.53	72.71	3.702	11.63	23.64	3.579	0.4391	3.556	0.2285	142.3	0.2344	0.3089	0.4289	5.396	91.82	25.34	117.2
1002	23.95	43.31	72.92	3.671	11.68	23.5	3.573	0.4342	3.518	0.2353	121	0.2449	0.3016	0.3846	5.287	92.76	28.75	122.2
1003	24.09	44.15	72.27	3.718	11.56	23.59	3.585	0.4361	3.518	0.2277	130.9	0.2655	0.3072	0.4025	5.362	90.3	26.31	116.8
1004	23.85	43.75	72.31	3.783	11.57	23.2	3.526	0.4416	3.481	0.2254	134.4	0.2653	0.3006	0.4023	5.246	92.52	29.02	122.6
1006	24.08	44.3	72.06	3.614	11.52	23.27	3.533	0.4039	3.399	0.2314	132.7	0.2539	0.302	0.3911	5.348	91.33	30.56	123.6
1008	24.08	43.82	72.98	3.711	11.68	23.34	3.549	0.3957	3.415	0.2064	117.3	0.2068	0.3026	0.3612	5.661	92.48	33.8	127.5
1009	23.9	43.57	72.63	3.664	11.63	23.34	3.544	0.4175	3.532	0.2247	133.2	0.2687	0.3026	0.4041	5.571	92.41	30.39	125.2
1010	24.6	44.15	71.76	3.69	11.48	23.17	3.524	0.4452	3.454	0.2396	141.6	0.2662	0.2976	0.384	5.089	87.5	26.54	112.9
1011	23.88	43.31	72.9	3.694	11.68	23.59	3.576	0.4359	3.459	0.2219	131.7	0.25	0.3027	0.3854	5.259	93.07	26.63	119.6
1013	23.53	43.41	72.93	3.756	11.67	23.77	3.604	0.4322	3.575	0.2123	125.7	0.2392	0.3079	0.3962	5.632	91.44	26.3	118.3
1014	23.98	43.68	72.81	3.752	11.65	23.62	3.596	0.4259	3.647	0.2317	129	0.2468	0.3036	0.4069	5.628	90.6	25.13	115.3
1015	23.86	43.43	72.38	3.647	11.58	23.45	3.547	0.4792	3.612	0.253	149	0.2738	0.3103	0.4204	5.012	93.72	22.93	116.2
1017	24.15	43.1	72.63	3.551	11.63	23.25	3.532	0.4521	3.415	0.227	138.6	0.2462	0.2994	0.3793	5.138	94.88	28.47	123.9
1018	23.93	43.56	72.33	3.767	11.57	23.67	3.589	0.4575	3.48	0.2235	137.4	0.2499	0.3067	0.4045	5.128	96.11	24.29	119.3
1019	24.23	43.76	72.05	3.621	11.53	23.63	3.58	0.4503	3.542	0.2306	132.8	0.2524	0.3066	0.3977	5.273	94.18	27.97	122.6
1020	24.09	44.31	72.22	3.667	11.56	23.35	3.548	0.4397	3.518	0.2267	129.5	0.247	0.3033	0.3964	5.328	93.28	26.78	119.9
1021	23.9	44.58	71.72	3.817	11.48	23.33	3.54	0.4297	3.497	0.2227	133.8	0.2399	0.3091	0.3934	5.37	95.06	25.9	120.7
1023	24.25	44.3	72.44	3.674	11.59	23.42	3.549	0.4324	3.513	0.2318	133.6	0.2699	0.3015	0.4071	5.351	85.96	26.03	113
1024	24.15	44.61	71.85	3.731	11.49	23.61	3.581	0.4437	3.536	0.2355	139.9	0.3053	0.3108	0.4216	5.269	91.75	21.88	111.7
1025	24.01	43.1	72.64	3.651	11.63	23.24	3.513	0.4156	3.468	0.2191	126.6	0.2354	0.3016	0.3814	5.522	94.35	29.55	124.8
1026	24.16	44.06	72.17	3.613	11.55	23.35	3.543	0.5089	3.382	0.2321	140.2	0.3007	0.3074	0.4118	4.661	90.66	25.77	115.8
1027	24.12	44.84	72.15	3.696	11.55	23.32	3.543	0.417	3.544	0.2242	132.7	0.2573	0.3031	0.4023	5.571	96.33	25.26	119.6
1028	23.85	43.36	72.53	3.692	11.6	23.49	3.565	0.4286	3.517	0.2205	132.7	0.2703	0.3055	0.3994	5.491	95.94	27.75	124.2
1029	23.66	43.21	72.56	3.695	11.61	23.55	3.573	0.4401	3.552	0.2261	130.2	0.2147	0.3053	0.3972	5.381	97.06	24.77	121.3
1030	23.91	43.48	72.34	3.752	11.56	23.43	3.558	0.4271	3.478	0.2191	122.7	0.236	0.2925	0.3861	5.44	95.59	28.6	126.2
1031	24.17	43.68	72.61	3.763	11.6	23.66	3.583	0.4522	3.614	0.2209	132.6	0.208	0.3052	0.3853	5.442	94.48	27.68	121.5
1032	23.92	43.53	72.5	3.739	11.61	23.75	3.599	0.441	3.51	0.2195	129.2	0.2671	0.3088	0.3998	5.368	93.71	23.7	116.8
1033	23.62	43.04	73.1	3.7	11.7	23.48	3.565	0.3963	3.655	0.2132	126.6	0.2013	0.3089	0.3945	6.107	102.46	27.96	131.4
1037	24.34	44.07	72.66	3.678	11.62	23.21	3.524	0.4136	3.576	0.2128	129.8	0.2789	0.301	0.3874	5.798	93.1	26.66	120.6
1038	23.98	43.32	72.5	3.754	11.61	23.56	3.577	0.4195	3.475	0.2194	118.8	0.2351	0.3055	0.3974	5.48	92.62	26.78	120.5
1039	23.97	44.51	72.1	3.695	11.54	23.37	3.555	0.4427	3.549	0.231	134.5	0.2184	0.3038	0.4048	5.325	91.05	25.84	117.2
1040	23.65	42.32	73.33	3.746	11.74	23.43	3.556	0.4072	3.574	0.2129	127.8	0.1914	0.3066	0.4067	5.873	98.55	34.45	135.5
1043	24.02	44.02	72.39	3.701	11.58	23.37	3.542	0.4653	3.453	0.2354	137.2	0.2649	0.3086	0.405	4.959	91.79	25.12	116.3
1044	24.04	43.87	72.62	3.785	11.62	23.65	3.598	0.4226	3.594	0.2273	133.3	0.228	0.3034	0.4042	5.631	91.66	26.18	118.3
1045	24.35	43.88	72.42	3.786	11.58	23.28	3.545	0.4457	3.429	0.2211	133.6	0.2706	0.3043	0.4087	5.169	92.78	31.32	125.3
1047	24.16	43.11	72.7	3.701	11.64	23.42	3.557	0.4419	3.584	0.2278	130	0.2606	0.3044	0.3993	5.44	95.76	26.41	123
1048	23.98	44.26	72.66	3.717	11.63	23.33	3.548	0.4334	3.573	0.2149	127.8	0.2581	0.2978	0.3668	5.571	94.48	23.87	118.2
1049	24.34	44.32	72.32	3.644	11.56	23.61	3.57	0.4504	3.456	0.2289	127.3	0.3041	0.3086	0.3953	5.085	87.29	24.87	111.5
1051	24.27	44.14	72.08	3.616	11.53	23.18	3.528	0.4677	3.458	0.2257	136.8	0.2582	0.3009	0.3821	5.061	92.42	26.75	119.5
1053	24.5	44.63	72.13	3.722	11.55	23.2	3.534	0.4561	3.601	0.2305	137.5	0.2645	0.2964	0.399	5.287	88.91	23.15	112.2
1056	23.71	43.83	72.79	3.701	11.65	23.65	3.59	0.433	3.567	0.2261	143.5	0.2365	0.3055	0.3942	5.484	91.26	26.86	118.3
1057	24.22	44	72.12	3.748	11.54	23.41	3.555	0.4412	3.55	0.2292	134.3	0.2588	0.305	0.4117	5.321	87.8	27.25	116.9
1059	24.42	44.49	72.39	3.553	11.6	22.95	3.488	0.4235	3.515	0.2326	136	0.2567	0.3021	0.402	5.425	86.64	30.27	118.1
1060	24.44	43.83	72.54	3.707	11.6	23.3	3.548	0.419	3.681	0.2206	132.3	0.2524	0.3037	0.4123	5.862	91.62	25.76	117.9
1062	23.69	44.13	72.43	3.862	11.59	23.43	3.561	0.4332	3.501	0.2315	125.1	0.2978	0.305	0.3912	5.305	92.88	27.18	119.9
1063	23.63	43.3	72.52	3.725	11.61	23.77	3.6	0.4611	3.533	0.2412	133.2	0.2972	0.3061	0.4024	5.103	90.73	24.78	114.5
1064	23.86	44.17	72.64	3.787	11.63	23.87	3.621	0.428	3.503	0.2297	138	0.2744	0.3091	0.4105	5.334	88.58	23.72	110.7
1066	24.69	44.95	71.06	3.617	11.36	23.15	3.513	0.4787	3.429	0.2361	145	0.2848	0.3056	0.416	4.911	85.22	26.66	113.7
1067	23.89	43.67	72.65	3.64	11.63	23.4	3.566	0.4613	3.485	0.2313	132.1	0.2577	0.3047	0.3977	5.093	94.01	31.09	126.6
1068	23.93	43.94	72.24	3.838	11.56	23.56	3.582	0.466	3.647	0.2444	141.6	0.2718	0.3079	0.4151	5.23	88.31	27.86	116.8
1070	23.92	43.08	72.9	3.771	11.66	23.93	3.633	0.4259	3.607	0.23	127	0.2409	0.3103	0.4055	5.555	89.97	26.39	117.2
1071	23.55	44.35	72.81	3.809	11.66	24.15	3.655	0.4449	3.673	0.2288	139.6	0.2379	0.3112	0.4158	5.504	89.82	21.13	109.3
1072	24.03	43.21	72.94	3.669	11.67	23.29	3.547	0.4233	3.548	0.2165	130.8	0.2137	0.3045	0.3954	5.631	93.32	31.49	127.1
1073	24.19	44.19	72.51	3.833	11.6	23.37	3.557	0.4185	3.622	0.2229	138.9	0.2329	0.3095	0.4118	5.699	91.21	23.89	115.9
1076	24.47	45.03	71.69	3.701	11.47	23.44	3.566	0.428	3.551	0.235	131.1	0.3088	0.3079	0.4174	5.408	86.56	21.47	107.2
1077	23.9	43.19	72.95	3.616	11.67	23.17	3.536	0.4131	3.469	0.2141	132.1	0.2407	0.3088	0.3981	5.546	95.42	33.8	132.4
1078	24.13	43.31	72.67	3.721	11.64	23.53	3.574	0.4773	3.548	0.2299	137.5	0.2206	0.3051	0.3829	5.13	94.45	24.68	118.4
1081	24.24	44.69	71.62	3.735	11.46	23.77	3.617	0.4549	3.567	0.2453	145	0.3229	0.3028	0.4241	5.191	85.07	23.14	107.7
1082	24.02	44.08	72.87	3.815	11.66	23.72	3.613	0.4408	3.602	0.2204	130.6	0.2157	0.3009	0.3875	5.516	93.76	24.88	117.8
1083	23.72	44.09	72.71	3.77	11.63	23	3.496	0.4275	3.457	0.2149	128.1	0.3194	0.3012	0.3726	5.392	94.52	30.76	125.7
1084	24.25	43.52	72.4	3.705	11.59	23.94	3.64	0.4623	3.531	0.2397	132.6	0.2887	0.3064	0.4181	5.106	88.04	23.2	109.9
1085	24.52	44.43	71.6	3.624	11.45	23.5	3.577	0.4528	3.487	0.2327	128.8	0.3034	0.3057	0.3894	5.121	88.87	25.92	114.2
1086	24.18	43.96	72.66	3.763	11.62	23.43	3.566	0.4349	3.53	0.2208	128.4	0.2571	0.3036	0.4015	5.431	88.11	26.8	113.6
1089	23.86	43.67	72.8	3.797	11.65	23.7	3.595	0.4431	3.68	0.2183	128.6	0.2492	0.3076	0.4061	5.633	91.57	23.42	114.1
1090	23.67	43.37	72.57	3.777	11.62	23.9	3.615	0.4495	3.656	0.2231	121.8	0.2463	0.309	0.3899	5.531	94.05	24.23	117.3
1092	23.87	42.99	72.99	3.613	11.68	22.94	3.488	0.4001	3.363	0.2083	118.5	0.2189	0.291	0.3522	5.563	91.15	36.28	130.4
1093	24.13	43.49	72.75	3.534	11.64	23.33	3.534	0.4345	3.552	0.2239	135.4	0.2424	0.3075	0.4304	5.442	94.34	25.2	119.8
1095	23.72	43.34	72.92	3.706	11.67	23.39	3.546	0.4158	3.491	0.2144	137.3	0.3383	0.3045	0.3993	5.579	94.68	24.23	117.7
1096	24	43.88	72.38	3.744	11.58	23.53	3.578	0.4221	3.539	0.2161	132.4	0.2384	0.3034	0.3889	5.638	91.64	26.78	118.8
1097	24.06	43.75	72.55	3.749	11.62	23.78	3.598	0.438	3.631	0.2192	131	0.2567	0.3048	0.3915	5.596	85.75	23.74	108.1
1098	24.2	43.16	72.29	3.648	11.57	22.91	3.48	0.443	3.437	0.2183	139.2	0.2996	0.2965	0.3823	5.24	92.05	29.59	123.1
1099	24.36	44.04	72.12	3.682	11.53	23.31	3.541	0.4356	3.447	0.2358	130.8	0.3306	0.3026	0.4042	5.139	89.91	25.14	114.4
1100	24.08	42.89	73	3.654	11.69	23.44	3.553	0.3982	3.598	0.2217	126.5	0.2646	0.3009	0.3966	5.902	90.4	23.53	112.9
1101	24.06	43.27	72.89	3.674	11.67	23.65	3.584	0.4403	3.614	0.2346	126.1	0.2411	0.2996	0.3841	5.416	92.26	24.34	117
1102	23.69	43.33	72.93	3.804	11.68	23.33	3.534	0.4307	3.441	0.2215	127.2	0.3279	0.3021	0.3921	5.276	96.21	25.08	120.4
1103	24.12	43.83	72.59	3.635	11.62	23.05	3.502	0.4323	3.499	0.2307	132.1	0.2945	0.3007	0.406	5.316	89.63	28.92	119.3
1105	24.07	43.86	72.53	3.627	11.61	23.45	3.557	0.4501	3.539	0.2369	131.4	0.2768	0.2996	0.3989	5.187	88.24	26.12	115
1108	24.16	43.42	72.84	3.722	11.66	23.84	3.619	0.4008	3.592	0.2123	130.7	0.2296	0.3019	0.3936	5.981	87.14	23.95	108.7
1109	24.33	43.59	72.15	3.703	11.54	23.52	3.562	0.472	3.599	0.2387	136.5	0.3043	0.3104	0.4022	5.132	89.73	22.94	113.1
1110	24.37	43.99	72.36	3.656	11.58	23.36	3.542	0.4241	3.563	0.2232	131.7	0.2089	0.3033	0.392	5.58	90.67	25.94	117.6
1112	24.11	44.21	72.42	3.642	11.59	23.06	3.509	0.4364	3.413	0.2226	127.7	0.2369	0.2953	0.3777	5.216	92.51	30.71	125.3
1113	24.09	43.03	72.35	3.765	11.57	23.52	3.56	0.4395	3.488	0.2348	133.7	0.2518	0.3099	0.4026	5.173	92.94	25.89	119.2
1114	24.19	43.52	72.32	3.714	11.57	23.5	3.563	0.4554	3.553	0.2343	131.3	0.2752	0.3057	0.4015	5.2	90.06	21.24	110.5
1115	24.1	43.28	72.76	3.627	11.64	23.1	3.511	0.435	3.473	0.2166	133.2	0.2415	0.3058	0.3966	5.341	93.47	32.16	128.3
1116	24.23	44.04	72.75	3.648	11.65	23.49	3.565	0.4154	3.604	0.2164	128.4	0.2167	0.3002	0.3865	5.787	88.13	23.97	111.6
1119	23.85	43.63	72.5	3.651	11.59	23.76	3.608	0.4569	3.483	0.2281	137.7	0.2299	0.3071	0.4001	5.126	89.91	24.87	113.9
1121	24.13	43.94	72.13	3.616	11.54	22.97	3.495	0.4451	3.394	0.24	143.5	0.2653	0.2939	0.395	5.014	91.75	30	122.5
1123	24.09	43.55	72.49	3.65	11.6	23.43	3.556	0.4397	3.521	0.228	135.8	0.2371	0.3048	0.4041	5.331	90.72	26.15	117.3
1124	24.16	43.56	72.08	3.646	11.55	23.1	3.508	0.4669	3.413	0.248	136.4	0.3026	0.3017	0.4005	4.834	87.92	24.8	111.9
1125	24.12	43.45	72.9	3.691	11.66	23.27	3.53	0.4239	3.52	0.2178	131.5	0.2657	0.3008	0.3811	5.508	91.07	23.43	111.7
1126	23.97	43.85	72.68	3.709	11.63	23.68	3.586	0.4202	3.575	0.2248	125.8	0.2057	0.3063	0.3875	5.625	88.09	25.58	114.2
1128	24	44.34	72.05	3.791	11.52	23.03	3.497	0.3872	3.486	0.2154	133.5	0.2557	0.2979	0.3816	5.858	92.59	30.62	124.2
1129	23.96	44.04	72.35	3.68	11.57	23.26	3.528	0.4171	3.441	0.2229	120.9	0.2779	0.2965	0.3789	5.372	88.37	29.38	120.7
1130	24.27	44.1	71.98	3.713	11.51	23.4	3.553	0.4456	3.603	0.2319	133.7	0.2671	0.3038	0.3932	5.364	88.45	22.98	110.7
1131	23.97	43.49	72.67	3.717	11.63	23.44	3.55	0.4337	3.489	0.2443	133	0.2558	0.3037	0.4303	5.204	92.85	28	121.2
1132	24.4	44.34	71.99	3.642	11.51	23.42	3.557	0.4322	3.513	0.2354	136.6	0.2512	0.3019	0.3942	5.318	86.52	24.73	111.8
2001	24.28	43.49	72.74	3.69	11.64	23.34	3.55	0.4555	3.508	0.2105	131	0.2446	0.2984	0.4045	5.294	90.43	26.82	117.6
2002	24.29	43.53	72.51	3.627	11.61	23.64	3.586	0.4386	3.587	0.2442	145.3	0.212	0.301	0.4115	5.317	90.44	25.1	114.5
2003	24.51	43.71	72.25	3.617	11.57	23.36	3.553	0.4546	3.463	0.2296	138.7	0.2424	0.3021	0.3967	5.096	91.01	26.9	118.4
2004	23.99	43.53	72.09	3.731	11.53	24.08	3.649	0.418	3.494	0.2241	138	0.1906	0.3064	0.409	5.497	88.77	26.78	115.3
2005	23.7	43.37	72.89	3.725	11.67	23.68	3.585	0.433	3.575	0.2177	119.7	0.2219	0.2987	0.4014	5.524	93.66	26.58	120.8
2006	24.56	43.43	72.39	3.642	11.58	23.33	3.55	0.4147	3.455	0.2231	128.5	0.2381	0.3056	0.3918	5.422	92.9	28.01	120.1
2007	24.2	44.1	72.2	3.735	11.56	23.65	3.597	0.4339	3.627	0.2319	151.6	0.2273	0.3103	0.4421	5.547	86.18	23.89	109.9
2008	24.15	43.65	72.62	3.714	11.62	23.51	3.574	0.4317	3.658	0.2106	137.1	0.1966	0.297	0.4313	5.764	91.13	27.75	118.1
2009	23.75	43.67	72.95	3.718	11.68	23.55	3.573	0.4274	3.514	0.2287	127.4	0.2476	0.3034	0.405	5.344	89.2	28.72	119.6
2010	23.52	43.49	72.72	3.77	11.63	23.75	3.603	0.4381	3.491	0.2451	137.8	0.202	0.3052	0.3958	5.161	92.72	27.12	118.9
2011	24.01	42.83	72.6	3.641	11.63	23.51	3.57	0.4412	3.563	0.2212	132.2	0.1887	0.2996	0.4137	5.416	92.2	26.18	120.7
2012	23.49	43.27	72.59	3.816	11.62	24.13	3.657	0.4308	3.572	0.2203	122.4	0.209	0.3032	0.4172	5.522	93.19	25.82	119.7
2013	24.51	44.6	71.51	3.663	11.45	23.47	3.573	0.4153	3.464	0.2285	134.4	0.2334	0.2967	0.4054	5.395	88.59	23.77	111.4
2014	23.92	43.88	72.35	3.731	11.58	23.82	3.608	0.4715	3.5	0.2415	131.6	0.2669	0.3015	0.4112	4.971	91.91	23.16	115
2015	23.16	43.7	72.22	3.685	11.55	23.56	3.578	0.42	3.544	0.2514	136.6	0.2664	0.302	0.4123	5.347	90.02	23.39	111.2
2016	24.29	44.06	72.96	3.722	11.67	23.88	3.625	0.4352	3.573	0.2251	125.8	0.243	0.3069	0.4106	5.504	93	23.75	114.7
2017	24.1	43.45	72.77	3.711	11.64	23.51	3.556	0.4442	3.511	0.2283	134	0.2693	0.3064	0.4189	5.258	93.91	26.34	120.4
2018	23.73	42.97	72.97	3.772	11.67	23.73	3.598	0.3954	3.658	0.2187	123.3	0.2819	0.3056	0.4014	5.977	94.75	27.91	123.2
2019	23.79	43.3	72.44	3.756	11.59	23.84	3.612	0.4657	3.427	0.2363	134.6	0.302	0.3052	0.4134	5.009	90.97	24.08	114.4
2020	24.29	44.18	72.11	3.665	11.54	23.32	3.549	0.4478	3.485	0.2316	132.5	0.2605	0.3006	0.3938	5.177	89.89	27.01	116.4
2021	23.95	44.06	72.57	3.724	11.62	23.52	3.576	0.4213	3.656	0.2284	127.4	0.1994	0.3075	0.3982	5.747	93.58	25.07	118.4
2022	24.13	43.63	72.47	3.771	11.6	23.59	3.586	0.4613	3.456	0.2462	138.9	0.2829	0.3054	0.4205	4.959	93.48	24.35	117.6
2023	24.2	43.88	72.65	3.695	11.63	23.52	3.557	0.4744	3.357	0.24	134.3	0.379	0.3097	0.4278	4.769	89.98	22.6	112.8
2024	24.58	44.25	70.94	3.712	11.35	22.92	3.496	0.4597	3.299	0.2409	153.7	0.2681	0.3023	0.4074	4.786	91.55	27.2	120.6
2025	24.53	43.69	71.95	3.714	11.51	23.98	3.645	0.4254	3.605	0.2289	136.2	0.2163	0.304	0.4135	5.594	88.64	21.67	108.6
2026	23.73	42.8	73.37	3.735	11.74	24.15	3.654	0.4377	3.459	0.219	126.3	0.2702	0.3025	0.3947	5.256	101.32	24.85	126.5
2027	23.79	42.93	73.25	3.741	11.73	23.97	3.628	0.4116	3.544	0.213	136.9	0.2266	0.3041	0.4181	5.698	92.59	26.36	119.3
2028	24.41	43.62	72.69	3.716	11.63	23.41	3.544	0.4159	3.531	0.2338	123.9	0.339	0.3066	0.4174	5.462	93.83	26.08	120.3
2029	23.86	43.93	72.04	3.728	11.51	23.57	3.577	0.4216	3.422	0.2379	132.1	0.2463	0.298	0.4102	5.187	92.58	24.58	117.5
2030	24	42.96	72.58	3.691	11.62	23.45	3.56	0.4437	3.422	0.2336	132.4	0.1955	0.2989	0.3995	5.09	96.13	26.56	123.4
2031	24.54	44.14	72.41	3.749	11.57	23.94	3.634	0.414	3.506	0.2253	133.7	0.2009	0.3038	0.3968	5.506	88.27	24.13	110.5
2032	24.37	44.15	72.09	3.726	11.54	23.16	3.516	0.4354	3.517	0.2294	134.9	0.1824	0.3004	0.3887	5.367	90.32	23.57	114.6
2033	24.37	43.44	72.5	3.659	11.6	23.2	3.517	0.447	3.526	0.23	127.9	0.2567	0.3022	0.424	5.261	94.65	26.02	122.7
2034	24.26	44.21	72.14	3.698	11.55	23.62	3.585	0.4307	3.597	0.235	130.1	0.2424	0.3039	0.4137	5.488	90.93	24.59	114.5
2035	24.43	44.15	72.11	3.642	11.54	23.56	3.583	0.4469	3.487	0.2356	135.3	0.2776	0.2983	0.3956	5.152	91.85	26.41	117.3
2037	24.22	43.89	72.63	3.709	11.63	23.62	3.587	0.4389	3.524	0.2363	139.2	0.2868	0.3078	0.4051	5.292	90.69	24.88	114.5
2038	24.71	44.49	71.73	3.765	11.47	23.22	3.522	0.4595	3.438	0.2399	147.6	0.218	0.3002	0.3956	4.985	86.99	23.78	110.3
2039	24.48	43.57	72.69	3.694	11.63	22.96	3.491	0.4603	3.422	0.2204	133	0.2657	0.3031	0.4008	5.046	91.89	29.55	122.2
2040	24.06	44.05	71.66	3.606	11.47	22.88	3.474	0.4191	3.48	0.2444	150.5	0.2505	0.2976	0.4096	5.288	93.89	24.85	119
2043	23.86	42.69	73.27	3.718	11.73	23.48	3.553	0.3893	3.502	0.2117	125.2	0.2476	0.2969	0.4061	5.862	99.35	27.02	127.3
2044	23.7	43.63	72.48	3.717	11.6	23.55	3.571	0.4441	3.405	0.2185	133.5	0.271	0.3062	0.3968	5.155	96.35	27.97	123.4
2045	23.95	43.01	73.04	3.803	11.69	23.41	3.544	0.4051	3.55	0.2258	134.6	0.2854	0.3118	0.4203	5.654	92.96	28.55	121.5
2046	23.84	43.01	72.81	3.657	11.65	23.97	3.621	0.4056	3.531	0.2163	129.8	0.2115	0.3016	0.3835	5.709	91.58	25.42	116.7
2048	24.03	43.42	72.79	3.718	11.64	23.77	3.603	0.4441	3.416	0.2288	132.2	0.3449	0.3007	0.414	5.047	92.84	25.5	120.3
2049	24.51	43.71	72.17	3.744	11.55	23.23	3.539	0.4699	3.502	0.2319	140.8	0.2333	0.2992	0.4037	5.141	93.93	25.79	119.5
2050	23.79	42.8	73.14	3.81	11.7	23.76	3.611	0.41	3.573	0.2087	121.9	0.2341	0.3025	0.4267	5.797	97.78	30.81	128.5
2051	23.92	44.11	72.58	3.764	11.61	23.74	3.593	0.4358	3.496	0.2341	129.6	0.2378	0.3013	0.4018	5.263	92.22	25.65	116.9
2052	23.87	43.18	72.73	3.706	11.63	23.6	3.586	0.415	3.493	0.2128	122.8	0.2808	0.3079	0.415	5.573	97.32	27.8	125.2
2053	24.03	43.48	72.67	3.709	11.63	23.72	3.592	0.4388	3.457	0.2297	130.2	0.3071	0.3038	0.4095	5.221	92.14	25.47	117.5
2054	23.79	42.79	72.9	3.676	11.66	23.54	3.567	0.4254	3.455	0.2292	125.7	0.2471	0.2961	0.3856	5.275	96.6	27.19	125.1
2055	24.25	42.98	73.07	3.644	11.69	23.67	3.585	0.4883	3.462	0.2318	133.9	0.2608	0.3086	0.4015	4.922	96.71	28.15	124.6
2056	23.24	43.01	72.71	3.779	11.63	23.54	3.563	0.4139	3.555	0.2249	133.3	0.2429	0.3016	0.4088	5.612	96.06	28.75	126.6
2057	23.65	43.06	73.31	3.73	11.73	24.13	3.663	0.4325	3.633	0.2257	126.9	0.1907	0.3066	0.4091	5.639	89.79	22.56	111.1
2058	23.61	43.52	72.5	3.82	11.6	24.1	3.659	0.4121	3.648	0.223	129.9	0.2366	0.3081	0.4155	5.816	90.23	22.57	112.6
2059	24.02	44.37	72.2	3.701	11.55	23.04	3.497	0.4388	3.458	0.2281	123.4	0.2059	0.3071	0.4079	5.209	89.24	28	119.2
2060	23.77	43.87	72.99	3.646	11.69	23.59	3.577	0.4238	3.444	0.2259	120.8	0.2327	0.2965	0.3755	5.296	94.65	28.89	124.8
2061	24.03	43.77	72.69	3.727	11.63	23.44	3.555	0.4402	3.537	0.229	134.7	0.2267	0.3037	0.4096	5.325	92.52	27.06	118.6
2062	23.92	43.16	72.94	3.647	11.66	23.74	3.604	0.4232	3.634	0.229	122.5	0.2597	0.3003	0.4255	5.689	96.46	24.75	120.7
2063	24.23	44.24	71.86	3.688	11.49	23.54	3.566	0.4387	3.548	0.2344	142.9	0.247	0.3049	0.4054	5.347	86.48	25	111.1
2064	23.87	43.6	72.96	3.694	11.69	23.39	3.542	0.4355	3.454	0.221	128.1	0.2198	0.297	0.4052	5.286	93.09	27.77	122.2
2065	24.09	43.26	73.01	3.653	11.68	23.93	3.625	0.4531	3.711	0.2399	127.4	0.1881	0.3133	0.4138	5.432	93.65	25.68	119.3
2066	23.79	43.34	72.9	3.742	11.66	23.56	3.577	0.4524	3.471	0.2321	122.3	0.3058	0.3041	0.4085	5.141	96.67	26.88	125
2067	23.79	43.32	72.82	3.699	11.65	23.83	3.624	0.4403	3.541	0.2294	134.8	0.2483	0.3059	0.3963	5.425	92.44	23.67	116.6
2068	24.42	44.21	71.75	3.663	11.49	23.09	3.525	0.4538	3.361	0.2317	135.9	0.2984	0.3074	0.4036	4.9	88.26	24.1	113.2
2069	24.36	43.47	72.66	3.638	11.63	23.06	3.502	0.4379	3.517	0.2144	130.4	0.196	0.3055	0.3963	5.415	94.51	27.69	123.9
2070	23.52	43.16	73.47	3.715	11.76	24.27	3.693	0.4177	3.614	0.2206	126	0.2349	0.3034	0.4067	5.712	95.24	25.35	119.9
2071	24.03	43.7	72.6	3.694	11.62	23.52	3.574	0.459	3.427	0.244	130	0.3096	0.3048	0.4112	4.951	90.93	26.3	115.9
2072	23.83	43.67	72.13	3.757	11.55	23.56	3.575	0.4714	3.593	0.2411	137.6	0.1999	0.3177	0.4377	5.216	86.58	28.43	115.1
2073	23.8	43.67	72.26	3.659	11.57	23.61	3.581	0.4302	3.458	0.2336	136.4	0.2683	0.3012	0.4187	5.235	87.69	26.94	116.3
2074	23.69	42.22	73.57	3.735	11.77	23.51	3.569	0.4422	3.586	0.2149	123.8	0.1709	0.3095	0.4104	5.513	97.7	31.22	130.7
2075	24.11	43.38	72.49	3.734	11.6	24.32	3.685	0.4557	3.596	0.2374	135	0.282	0.3102	0.4172	5.321	89.96	22.52	111.4
2076	23.82	44.62	72.43	3.732	11.59	23.96	3.629	0.4855	3.594	0.2298	131.8	0.3283	0.3072	0.4488	5.177	88.27	21.85	109.5
2077	23.72	43.46	73.03	3.641	11.7	23.43	3.555	0.4239	3.491	0.2171	127.8	0.2493	0.3068	0.411	5.507	96.77	30.96	127.9
2079	23.93	43.92	72.97	3.69	11.68	23.67	3.581	0.4362	3.631	0.2192	128.9	0.2152	0.3087	0.4292	5.609	89.99	24.73	115.7
2080	23.39	42.79	72.95	3.754	11.67	23.69	3.582	0.399	3.662	0.2149	127	0.2416	0.2964	0.4182	5.975	94.48	28.6	125.2
2081	24.04	43.61	73.01	3.594	11.68	23.52	3.576	0.4723	3.495	0.2337	128.4	0.2574	0.2999	0.3974	5.008	94.78	23.62	119.3
2082	23.8	43.56	72.97	3.792	11.68	23.67	3.583	0.4322	3.524	0.2171	127.4	0.2246	0.305	0.4044	5.455	92.11	27.45	119.5
2083	23.78	43.03	73.16	3.688	11.7	23.91	3.625	0.4315	3.497	0.2208	131.4	0.23	0.3116	0.4152	5.374	92.98	24	118.4
2084	24.03	43.3	73.46	3.666	11.76	23.73	3.6	0.412	3.598	0.2255	136	0.2146	0.305	0.4026	5.682	89.49	24.64	114.7
2085	24.03	43.4	72.58	3.729	11.62	23.82	3.602	0.4257	3.561	0.2284	132.6	0.2762	0.3114	0.429	5.517	92.89	26.15	117.5
2086	23.93	43.47	72.9	3.66	11.66	23.69	3.597	0.4257	3.515	0.2123	124.7	0.2272	0.3018	0.3917	5.523	90.61	26.8	119
2087	24.28	43.66	72.51	3.671	11.61	23.13	3.508	0.4456	3.355	0.2119	132	0.2938	0.2995	0.3932	5.08	91.9	29.09	121.7
2088	24.04	43.57	72.57	3.605	11.61	23.68	3.594	0.4553	3.492	0.2361	136.4	0.2646	0.3023	0.4113	5.103	85.65	27.7	115.1
2089	24.55	44.16	71.71	3.624	11.47	23.35	3.552	0.4223	3.414	0.2252	128.1	0.3508	0.3044	0.4171	5.283	87.73	25.65	113
2090	24.05	43.64	72.96	3.712	11.67	23.3	3.535	0.5058	3.357	0.2371	125.2	0.3773	0.3021	0.4129	4.603	85.75	29.49	116.8
2092	23.54	42.65	73.01	3.686	11.68	23.72	3.589	0.4124	3.567	0.2116	120.3	0.2128	0.3044	0.4039	5.716	91.1	31.31	123.4
2093	24.22	43.94	72.44	3.722	11.59	23.25	3.524	0.5001	3.411	0.2394	137.4	0.378	0.3043	0.4068	4.714	93.68	27.75	121.5
2095	24.51	43.63	71.5	3.627	11.45	23.36	3.556	0.4545	3.541	0.2366	163.9	0.2009	0.3073	0.4247	5.218	89.6	24.52	113.2
2096	23.53	43.23	72.62	3.677	11.62	23.59	3.577	0.4517	3.559	0.2298	132.3	0.2606	0.3036	0.4144	5.284	89.78	27.4	116.8
2097	23.92	44.07	72.55	3.697	11.6	23.54	3.577	0.458	3.46	0.226	127.7	0.3122	0.3042	0.4017	5.086	91.87	25.32	115.9
2098	23.77	43.71	72.99	3.676	11.68	23.77	3.6	0.4647	3.556	0.225	133	0.3136	0.306	0.3884	5.219	93.72	24.78	116.1
2099	23.77	43.59	72.56	3.769	11.62	24	3.635	0.4362	3.694	0.2256	125.9	0.2135	0.3027	0.4418	5.71	89.36	23.16	111.7
2100	23.73	44.11	72.58	3.691	11.61	23.96	3.627	0.4702	3.479	0.2482	135.4	0.314	0.3107	0.4182	4.928	91.91	24.77	115.2
2101	23.73	43.29	72.73	3.638	11.64	23.47	3.562	0.4507	3.464	0.2267	134.7	0.2809	0.301	0.4123	5.143	96.02	29.33	126
2102	24.28	45.79	71.3	3.524	11.4	22.57	3.438	0.4427	3.603	0.2443	139.9	0.292	0.3041	0.4497	5.325	88.72	25.6	113.5
2103	23.68	43.41	73.1	3.717	11.71	24.06	3.654	0.4586	3.734	0.235	129.8	0.2438	0.308	0.4277	5.481	91.81	25.17	116.2
2104	23.43	43.93	71.5	3.714	11.44	23.65	3.586	0.4615	3.473	0.2539	142.6	0.2427	0.3056	0.3954	4.979	87.22	23.73	109.8
2105	23.53	43.61	72.95	3.758	11.67	23.4	3.542	0.4206	3.593	0.2289	123.1	0.2086	0.3081	0.4025	5.568	91.77	30.34	123.2
2108	24.29	44.06	72.28	3.595	11.56	23.18	3.529	0.4283	3.469	0.2355	137.5	0.214	0.3048	0.3951	5.28	92.67	27.24	121.2
2109	23.49	43.18	72.41	3.682	11.59	23.89	3.607	0.4267	3.548	0.2293	134.2	0.2219	0.3071	0.4164	5.506	97.02	26.55	122.8
2110	23.37	42.13	73.94	3.543	11.83	23.4	3.55	0.4678	3.395	0.2253	134	0.2896	0.3071	0.3831	4.929	96.2	32.32	130.9
2111	23.81	42.89	73.27	3.683	11.72	23.31	3.542	0.4507	3.469	0.223	132.3	0.299	0.3077	0.4004	5.23	98.51	31.29	131.4
2112	24.39	43.57	72.6	3.641	11.62	23.32	3.542	0.4371	3.564	0.2314	135.9	0.2736	0.299	0.3984	5.371	90.25	29.01	119.8
2113	24.02	43.37	73.04	3.674	11.68	23.08	3.514	0.4198	3.55	0.2241	121.7	0.3428	0.3062	0.3845	5.52	96.3	30.58	128.9
2114	24.03	43.37	72.8	3.662	11.65	23.37	3.55	0.437	3.425	0.2294	125.6	0.3342	0.302	0.391	5.196	92.36	29.11	121.8
2115	23.9	42.98	72.62	3.629	11.63	23.26	3.528	0.4476	3.403	0.2256	136.8	0.2334	0.3042	0.3837	5.092	97.79	29.77	127.2
2116	24.01	43.59	72.8	3.725	11.66	23.08	3.509	0.4216	3.362	0.2284	125.9	0.3078	0.3077	0.3929	5.121	92.97	29.74	125.1
2117	24.43	43.78	71.09	3.456	11.38	23.78	3.61	0.4747	3.44	0.2308	140.9	0.2425	0.302	0.4285	4.958	87.38	24.6	110.9
2119	24.32	44.61	71.46	3.674	11.42	23.77	3.6	0.4381	3.579	0.236	141.7	0.2318	0.3064	0.4294	5.405	85.06	20.5	105.2
2120	23.93	43.82	72.77	3.681	11.66	23.55	3.575	0.4422	3.482	0.2337	136	0.2803	0.3052	0.4101	5.181	89.1	25.89	113.3
3001	24.12	43.68	72.64	3.563	11.61	23.27	3.532	0.4318	3.545	0.2367	137.5	0.218	0.3029	0.4017	5.33	94.8	26.07	120.3
3002	24.25	43.96	72.7	3.558	11.62	23.97	3.622	0.439	3.513	0.2364	122.7	0.269	0.3063	0.4277	5.274	94	20.66	113.4
3003	24.21	44.05	71.99	3.647	11.52	23.27	3.526	0.4287	3.544	0.2318	129.1	0.2335	0.3019	0.4094	5.41	90.2	26.79	116.6
3011	24.27	42.98	73.02	3.571	11.69	23.55	3.577	0.4474	3.619	0.2395	139.6	0.2339	0.3063	0.4495	5.335	95.06	26.52	121.4
3012	24	43.08	72.81	3.767	11.66	23.47	3.561	0.4106	3.594	0.2299	119.6	0.3074	0.3085	0.412	5.708	95.54	26.37	121.4
3013	23.73	43.66	71.91	3.654	11.5	23.57	3.579	0.4804	3.491	0.2381	137.6	0.3129	0.301	0.4137	4.916	93.42	23.97	116.9
3021	24.45	43.79	72.52	3.629	11.61	22.85	3.48	0.4201	3.437	0.2181	116.4	0.3273	0.3043	0.4031	5.44	100.43	26.63	126.8
3022	24.69	45.31	71.51	3.696	11.45	23.65	3.59	0.4241	3.504	0.232	125	0.327	0.2996	0.4022	5.359	88.23	21.32	108
3031	23.74	42.95	73.1	3.718	11.7	24.08	3.646	0.4307	3.582	0.2178	120.6	0.2269	0.3033	0.4066	5.604	97.4	24.96	122.1
3032	24.22	43.99	72.17	3.753	11.56	23.65	3.583	0.4469	3.596	0.2284	124.7	0.2363	0.3005	0.4151	5.393	98.62	28.13	127.5
3033	24.03	43.32	72.52	3.728	11.61	23.26	3.535	0.4167	3.537	0.2293	122.6	0.2653	0.2965	0.4219	5.504	94.28	29.94	125.4
3041	23.52	42.58	73.23	3.649	11.73	23.35	3.539	0.4334	3.389	0.2222	129	0.2574	0.3001	0.3965	5.131	96.32	33.85	132.2
3042	23.74	43.44	73.61	3.666	11.78	23.23	3.523	0.3997	3.465	0.2144	116	0.306	0.2997	0.3713	5.648	97.99	27.56	124.6
3051	23.77	43.68	72.69	3.781	11.63	23.58	3.575	0.4466	3.504	0.2201	121.8	0.2803	0.3045	0.4077	5.289	89.9	26.58	117.5
3052	23.66	42.78	72.95	3.801	11.67	23.71	3.588	0.4488	3.546	0.2422	131	0.2466	0.3059	0.43	5.215	98.14	26.19	124.4
3053	23.46	42.44	73.49	3.792	11.75	23.68	3.591	0.4438	3.66	0.218	124.2	0.2552	0.2947	0.4131	5.637	99.26	29.84	130.3
3061	24.39	44.33	71.56	3.711	11.46	22.92	3.482	0.4547	3.514	0.2339	141.6	0.2476	0.2906	0.3711	5.224	93.94	33.38	130.1
3062	23.84	42.91	73.21	3.673	11.73	23.84	3.596	0.3995	3.618	0.2128	125.1	0.2253	0.3109	0.4012	6.001	97.01	26.98	123.8
3071	23.58	43.46	72.63	3.703	11.63	23.82	3.606	0.4968	3.702	0.2428	139.7	0.2811	0.3028	0.4435	5.102	86.09	23.45	109.5
3072	23.66	44.33	72.15	3.764	11.54	24.02	3.645	0.4419	3.764	0.2185	132.8	0.1936	0.3072	0.4267	5.873	85.37	22.77	107.5
3073	24.13	43.59	72.67	3.625	11.64	23.31	3.543	0.4442	3.568	0.2188	133.3	0.2407	0.3095	0.4364	5.5	92.83	27.41	121.3
3081	23.76	43.42	72.72	3.727	11.65	23.71	3.604	0.4397	3.573	0.2214	125	0.2097	0.3011	0.3958	5.469	92.46	25.37	117.4
3082	24.02	43.5	72.82	3.593	11.66	23.33	3.549	0.4473	3.5	0.2356	136.5	0.2594	0.3031	0.401	5.177	93.26	26.26	120.4
3091	23.64	42.74	73.24	3.677	11.71	23.61	3.583	0.4221	3.534	0.2106	122.3	0.2306	0.3011	0.3898	5.665	94.9	29.63	125.9
3092	23.66	42.5	73.32	3.795	11.74	24.33	3.685	0.4062	3.687	0.2184	123.5	0.2282	0.3117	0.4258	6.067	90.82	25.04	116.3
3093	23.55	43.45	72.83	3.766	11.65	23.42	3.555	0.4311	3.549	0.2229	127.7	0.1972	0.3008	0.3894	5.488	97.52	28.84	127.3
3101	23.7	42.6	73.21	3.761	11.71	24.14	3.663	0.4449	3.538	0.2314	134.4	0.2306	0.2921	0.398	5.292	93.72	25.89	119
3102	23.92	42.91	72.75	3.742	11.65	23.65	3.584	0.4707	3.603	0.2216	131.5	0.237	0.3042	0.4581	5.369	96.72	24.95	120.3
3111	23.63	42.62	72.97	3.734	11.69	23.64	3.593	0.428	3.52	0.2061	135.7	0.2306	0.3037	0.4006	5.55	93.87	27.89	122.4
3112	24.32	43.68	72.28	3.628	11.57	23.22	3.521	0.459	3.45	0.2409	140.6	0.255	0.3011	0.3946	5.003	96.12	28.15	124.9
3113	23.99	43.49	72.8	3.628	11.64	23.53	3.571	0.4203	3.529	0.2239	139.1	0.2491	0.3007	0.4068	5.545	93.57	27.14	121.7
3121	24.66	43.84	72.58	3.541	11.62	23.18	3.519	0.4587	3.449	0.2217	142	0.2095	0.3025	0.3989	5.083	90.05	29.05	120.9
3131	24.32	44.38	71.98	3.639	11.52	23.05	3.508	0.4317	3.404	0.2412	131.9	0.3544	0.2933	0.4101	5.051	88.6	27.65	117.5
3132	24.01	43.49	72.61	3.75	11.61	23.81	3.613	0.4105	3.554	0.2303	122.3	0.2092	0.3103	0.3981	5.615	86.37	23.55	109.7
3133	23.59	43.17	72.85	3.624	11.66	23.37	3.542	0.4667	3.464	0.2142	132.3	0.3072	0.2975	0.3805	5.148	93.5	27.63	121.9
3141	24.2	44.13	71.94	3.678	11.5	23.43	3.568	0.4592	3.558	0.2449	132.6	0.3269	0.3144	0.422	5.131	90.08	24.39	114.2
3142	23.89	43.48	72.46	3.779	11.6	23.63	3.586	0.4214	3.48	0.2217	130.6	0.2635	0.3029	0.4116	5.494	92.08	26.62	119
3151	23.87	42.85	72.96	3.603	11.68	23.83	3.627	0.4248	3.506	0.2376	131.7	0.2413	0.3029	0.4383	5.338	91.99	25.15	116.6
3152	23.9	42.87	73.2	3.698	11.72	23.6	3.585	0.4283	3.539	0.2224	130.7	0.2242	0.3053	0.394	5.477	88.42	34.71	126.1
3153	23.71	43.01	73.3	3.579	11.73	23.54	3.589	0.434	3.47	0.2405	135	0.2223	0.3028	0.4039	5.142	92.85	30.83	124.2
3161	23.44	43.22	73.06	3.744	11.7	23.5	3.57	0.446	3.492	0.2224	136.2	0.2798	0.302	0.4016	5.28	90.72	26.31	118.2
3162	24.52	43.87	72.72	3.641	11.63	23.5	3.569	0.4453	3.592	0.2306	135.2	0.2176	0.3046	0.4317	5.385	93.16	25.04	118.4
3171	24.5	44.77	71.51	3.685	11.44	23.11	3.506	0.4301	3.553	0.2195	130.5	0.3136	0.3032	0.4074	5.558	89.15	24.19	112.4
3172	24.26	44.09	72.27	3.717	11.57	23.64	3.582	0.4425	3.578	0.2358	136.2	0.2338	0.3039	0.3904	5.36	88.73	25.55	113.8
3181	24.02	43.98	72.74	3.582	11.64	23.03	3.51	0.395	3.442	0.2168	132.3	0.2554	0.2955	0.3924	5.644	92.82	29.99	124.4
3182	24.21	43.33	72.67	3.676	11.62	23.6	3.576	0.4438	3.453	0.2309	134.8	0.3033	0.3064	0.4271	5.167	91.34	25.24	116.7
3191	23.15	42.01	73.48	3.818	11.76	24.16	3.665	0.4251	3.548	0.2156	129.7	0.1549	0.3003	0.4028	5.568	100.9	27.82	129.8
3192	23.48	42.9	73.41	3.694	11.74	23.46	3.565	0.4092	3.582	0.224	133.3	0.1733	0.3048	0.3768	5.759	95.72	27.68	123.5
3193	23.95	43.86	72.74	3.781	11.63	23.61	3.583	0.4153	3.614	0.2251	137.9	0.1678	0.3081	0.4023	5.752	93.95	23.2	116.6
3201	23.82	44.07	72.83	3.781	11.65	23.64	3.588	0.4595	3.464	0.2363	139.8	0.1964	0.3078	0.401	5.045	94.02	26.9	121.4
3202	23.95	43.26	73	3.721	11.68	23.35	3.555	0.4366	3.471	0.219	126.5	0.2147	0.3039	0.4124	5.339	94.96	28.85	124.4
3211	24.21	43.89	72.49	3.731	11.6	23.36	3.549	0.4337	3.515	0.2237	135.4	0.2273	0.2997	0.3981	5.404	91.57	26.4	118.5
3221	24.08	43.06	72.71	3.661	11.64	23.55	3.577	0.4762	3.452	0.2281	129.6	0.293	0.3041	0.3847	4.98	94.84	26.82	122.4
3222	24.41	43.44	72.41	3.654	11.58	23.22	3.531	0.4303	3.539	0.2329	132.3	0.2255	0.3076	0.3945	5.386	94.9	27.69	123
3231	24.07	43.12	72.85	3.598	11.66	23.69	3.598	0.4575	3.456	0.2339	142.4	0.2401	0.3053	0.3975	5.059	95.75	27.76	124.4
3233	24.75	43.98	71.57	3.718	11.44	23.35	3.553	0.4721	3.633	0.2344	141.5	0.2417	0.3072	0.3994	5.24	89.39	22.75	111.1
3241	23.92	43.14	73.02	3.745	11.69	23.73	3.606	0.4258	3.488	0.2239	130	0.2987	0.3067	0.3833	5.441	94.36	24.73	118.4
3242	24.58	44.32	72.15	3.603	11.55	23.44	3.576	0.4577	3.51	0.2268	135.8	0.2329	0.3066	0.408	5.195	88.7	26.33	115.5
3252	24.14	43.66	72.08	3.811	11.53	23.5	3.563	0.4626	3.533	0.231	130.9	0.2688	0.3045	0.405	5.179	93.6	26.83	121.1
3253	24.09	44.42	72.34	3.82	11.57	23.94	3.634	0.4381	3.721	0.2195	132.4	0.2342	0.3035	0.3914	5.776	85.23	22.1	106.9
3261	24.14	43.22	72.76	3.7	11.64	23.71	3.602	0.4412	3.632	0.2259	132.7	0.2184	0.3071	0.4051	5.572	93.76	25.38	119.5
3262	24.19	42.95	72.09	3.645	11.53	23.68	3.592	0.4331	3.591	0.2323	141	0.2178	0.3072	0.4041	5.48	89.23	26.29	115.3
3271	23.89	43.27	72.91	3.787	11.67	23.54	3.567	0.4219	3.522	0.2147	124.4	0.2676	0.302	0.38	5.604	95.94	27.98	124.4
3272	23.86	43.13	72.34	3.733	11.56	23.34	3.535	0.4205	3.648	0.2284	125.5	0.24	0.3021	0.3984	5.722	93.62	27.7	121.8
3281	24.1	44.25	72.41	3.831	11.59	24.19	3.673	0.4574	3.648	0.2314	135	0.2308	0.3061	0.395	5.387	88.83	22.48	110.4
3282	23.94	43.38	72.32	3.773	11.56	23.58	3.572	0.4439	3.391	0.2247	130	0.2214	0.3089	0.3985	5.183	99.21	26.71	125.9
3291	24.61	44.92	71.35	3.693	11.41	23.53	3.582	0.4491	3.583	0.2358	126.6	0.3149	0.3067	0.4223	5.282	84.1	23.46	106.6
3292	24.08	43.17	72.71	3.579	11.64	23.64	3.583	0.4637	3.501	0.2234	128.6	0.2128	0.3073	0.394	5.127	91.53	26.34	117.8
3301	24.18	43.14	72.8	3.728	11.66	23.36	3.56	0.4278	3.526	0.2246	135.4	0.2074	0.3144	0.4228	5.475	91.01	28.12	119.8
3302	23.63	42.71	73.2	3.611	11.73	23.56	3.582	0.4229	3.449	0.2223	137.4	0.2085	0.311	0.3929	5.382	95.2	31.14	128
3311	24.12	43.64	72.41	3.724	11.58	23.47	3.559	0.4335	3.489	0.2145	125.3	0.3669	0.3005	0.3843	5.41	88.87	24.01	112.8
3312	23.58	42.26	73.18	3.682	11.7	23.6	3.588	0.4474	3.429	0.2217	119.1	0.3641	0.3067	0.4217	5.154	99.12	27.7	127.6
3313	24.11	43.45	71.65	3.764	11.47	23.72	3.596	0.4868	3.505	0.2358	139.2	0.273	0.3009	0.4369	4.956	91.91	23.32	114.2
3321	23.98	43.58	72.51	3.626	11.6	23.41	3.557	0.4485	3.45	0.2335	133.7	0.2525	0.3069	0.4118	5.071	90.58	25.33	116.7
3322	23.77	43.28	72.75	3.63	11.65	23.23	3.531	0.4531	3.526	0.2175	129	0.2001	0.3042	0.3993	5.335	95.99	29.7	127.2
3331	24.09	43.53	72.34	3.565	11.58	23.57	3.571	0.4509	3.347	0.2298	135.8	0.26	0.3073	0.406	4.919	89.88	26.73	116.4
3332	24.02	42.9	72.92	3.665	11.67	23.49	3.567	0.4444	3.398	0.2106	129.9	0.228	0.3021	0.3869	5.187	94.65	27.58	123
3333	24.28	42.86	73.1	3.506	11.71	23.5	3.57	0.4304	3.45	0.2073	130	0.1888	0.303	0.4003	5.49	95.93	27.58	124.7
3341	24.07	43.7	72.5	3.592	11.6	23.14	3.512	0.4249	3.336	0.2285	128.5	0.2546	0.3052	0.3935	5.133	89.84	27.19	118.6
3342	23.82	43.37	72.26	3.63	11.55	24.06	3.639	0.5256	3.437	0.2302	141	0.2781	0.3062	0.4378	4.819	88.22	24.5	112.4
3351	24.06	43.73	72.49	3.728	11.61	23.68	3.592	0.4329	3.635	0.2266	139.9	0.2848	0.3061	0.4163	5.628	89.85	25.29	115.8
3352	24.01	43.67	72.45	3.615	11.59	23.15	3.52	0.4179	3.466	0.2296	126.2	0.2527	0.3133	0.404	5.37	94.38	27.32	122.7
3361	24.19	44.09	72.24	3.535	11.56	22.98	3.485	0.4101	3.574	0.2347	133.7	0.2331	0.299	0.4133	5.573	86.18	31.14	120.1
3371	23.89	43.9	72.44	3.519	11.59	23.56	3.567	0.4544	3.564	0.2311	135.9	0.2285	0.3015	0.4166	5.289	90.82	22.61	112
3372	24.2	43.33	72.88	3.551	11.66	23.2	3.519	0.4497	3.533	0.229	130.7	0.2148	0.3012	0.4013	5.25	86.62	28.83	117.6
3373	24.39	43.7	71.8	3.576	11.48	23.36	3.547	0.4383	3.417	0.2336	145.5	0.2299	0.3003	0.3867	5.105	86.53	26.21	113.8
3381	23.95	44.61	71.12	3.492	11.38	22.77	3.456	0.4697	3.518	0.2283	133.8	0.2223	0.3028	0.3855	5.132	82.95	24.84	107.1
3382	23.79	42.38	72.96	3.52	11.68	23.06	3.492	0.4255	3.354	0.2086	121.8	0.2231	0.2919	0.4015	5.237	93.91	37.75	134.2
3391	23.94	43.04	72.92	3.639	11.68	24	3.629	0.4397	3.498	0.227	129.2	0.2914	0.3076	0.3837	5.274	86.59	25.73	112.7
3392	23.74	43.27	73.02	3.698	11.67	23.67	3.579	0.4165	3.553	0.2174	124.7	0.1845	0.3094	0.3833	5.654	93.57	27.72	122.4
3393	23.97	43.58	73.15	3.556	11.71	23.22	3.52	0.4451	3.354	0.2216	127.3	0.2307	0.3015	0.3703	5.085	92.98	26.29	119.9
3401	23.62	43.95	72.62	3.74	11.63	23.68	3.594	0.4524	3.665	0.223	143.1	0.2438	0.3078	0.4441	5.524	86.92	26.52	114.8
3402	24.17	43.49	72.18	3.69	11.54	23.55	3.583	0.4514	3.533	0.2335	137.9	0.2677	0.3128	0.4173	5.261	89.62	26.97	116.6
3411	23.98	43.22	72.61	3.694	11.62	23.5	3.568	0.3993	3.554	0.2008	123.8	0.2764	0.3057	0.3889	6.12	93.82	29.65	124.6
3412	24.55	44.03	72.17	3.696	11.55	23.62	3.585	0.4362	3.639	0.2284	133.9	0.2518	0.3042	0.4018	5.532	91.94	23.43	113.9
3413	24.42	42.73	73	3.55	11.68	22.58	3.439	0.4236	3.481	0.2227	140.8	0.2267	0.3078	0.4177	5.45	97.32	34.44	134
3421	23.8	43.11	72.89	3.776	11.67	23.43	3.56	0.4255	3.684	0.23	132.7	0.2169	0.3121	0.429	5.715	94.58	29.79	125.1
3422	24.18	44.48	72.25	3.673	11.56	23.31	3.54	0.4646	3.691	0.2275	137.4	0.2241	0.3053	0.3976	5.439	85.21	26.35	111.5
3431	23.66	43.76	72.73	3.807	11.64	24.07	3.643	0.4276	3.723	0.2099	133	0.2211	0.3013	0.408	5.955	88.53	24.59	113.8
3432	24.63	44.83	71.87	3.567	11.51	23.03	3.504	0.4333	3.563	0.2277	143.8	0.2758	0.3033	0.4494	5.476	86.43	25.52	112.3
3433	23.87	43.62	72.55	3.752	11.61	23.68	3.594	0.448	3.512	0.2128	127.5	0.298	0.3077	0.3757	5.404	92.79	27.13	119.6
3441	23.92	43.47	73	3.708	11.68	23.44	3.556	0.4393	3.613	0.2254	133.5	0.2753	0.3119	0.4473	5.505	94.34	27.93	123.1
3442	24.26	44.78	72	3.74	11.52	23.08	3.512	0.4081	3.471	0.2334	127	0.3244	0.3009	0.404	5.435	89.11	25.64	115.3
3451	24.13	43.56	72.52	3.669	11.61	23.33	3.546	0.4426	3.454	0.2251	132.2	0.318	0.3057	0.4099	5.177	93.93	26.68	120.6
3452	24.16	44.85	71.66	3.753	11.46	23.28	3.539	0.3979	3.563	0.2362	131.9	0.2687	0.295	0.3931	5.704	88.01	23.88	112
3461	24.95	45.79	71.24	3.691	11.4	23.07	3.513	0.4346	3.39	0.2325	123	0.3841	0.2896	0.3835	5.096	81.99	22.29	103.7
3462	24.04	44.67	71.73	3.849	11.48	23.39	3.549	0.4045	3.62	0.2207	120.9	0.2587	0.2988	0.4064	5.831	87.97	24.95	112.5
3471	24.06	42.98	72.85	3.564	11.66	23.28	3.531	0.4106	3.51	0.2163	127.3	0.2554	0.2961	0.3915	5.603	97.22	31	128.9
3472	25.02	44.99	71.71	3.701	11.47	22.98	3.489	0.463	3.428	0.2341	143.8	0.283	0.3016	0.4061	4.96	91.8	26.06	117.4
3473	24.39	43.99	72.42	3.701	11.58	23.11	3.506	0.4203	3.602	0.2264	136.5	0.2197	0.3105	0.4095	5.63	89.38	26.32	115.8
3481	24.01	43.77	72.25	3.729	11.55	23.75	3.616	0.4491	3.56	0.2295	140.1	0.2295	0.3062	0.4344	5.289	88.03	22.84	110.8
3482	24.28	42.88	72.29	3.589	11.57	23.18	3.53	0.4934	3.407	0.2436	134.5	0.2623	0.3011	0.4341	4.66	92.95	29.25	122.8
3491	24.11	43.82	72.33	3.729	11.57	23.53	3.574	0.4432	3.553	0.2296	136.4	0.2314	0.305	0.3992	5.362	90.29	26.24	116.7
3492	23.87	43.58	72.32	3.9	11.57	23.88	3.623	0.4591	3.588	0.2309	129.9	0.2259	0.3006	0.4103	5.331	90.99	23.39	113.1
3493	23.5	44.18	71.95	3.832	11.51	23.49	3.572	0.426	3.527	0.2258	130.8	0.2498	0.3033	0.3878	5.455	90.59	25.83	115.8
4002	24.25	43.76	72.32	3.667	11.57	23.44	3.558	0.4524	3.561	0.2286	132.9	0.223	0.3078	0.4144	5.311	90.71	28.31	120
4003	24.04	43.94	72.29	3.668	11.58	23.34	3.543	0.4475	3.577	0.229	135.6	0.2308	0.3075	0.4312	5.405	91.85	25.24	116.8
4004	24.17	43.98	71.97	3.65	11.52	23.59	3.587	0.4654	3.493	0.2458	136.6	0.2751	0.3034	0.4261	4.998	88.05	25.51	113.3
4006	24.03	43.42	72.46	3.646	11.6	23.5	3.564	0.435	3.45	0.2508	135.5	0.2586	0.2949	0.3957	5.058	94.23	25.74	118.9
4007	24.07	43.69	72.52	3.666	11.6	23.63	3.585	0.4458	3.574	0.2339	129.2	0.2601	0.3118	0.4439	5.371	91.15	25.08	116.1
4008	24.07	43.27	72.63	3.702	11.62	23.54	3.571	0.4299	3.53	0.2265	130.4	0.2371	0.305	0.3999	5.451	94.47	26.39	120.9
4009	23.9	43.94	72.59	3.62	11.61	23.76	3.608	0.4235	3.571	0.2238	130.8	0.2634	0.3043	0.4032	5.607	89.99	25.47	115.6
4011	23.95	43.76	73.01	3.697	11.69	23.63	3.589	0.4441	3.57	0.2254	126	0.2601	0.3041	0.4097	5.412	92.02	25.66	117.1
4012	24.11	43.18	72.73	3.614	11.63	23.03	3.493	0.4364	3.519	0.231	134.1	0.2354	0.3042	0.4253	5.309	92.25	28.74	121.4
4013	24.13	43.33	72.83	3.668	11.66	23.55	3.577	0.44	3.552	0.2264	133.7	0.2239	0.3039	0.4047	5.411	93.28	26.58	119.7
4014	24.06	43.2	72.69	3.673	11.62	23.84	3.604	0.4427	3.521	0.2331	134.8	0.2634	0.3117	0.4146	5.286	97.93	25.42	122.9
4015	24.21	43.8	72.33	3.618	11.58	23.64	3.586	0.4724	3.558	0.238	146.2	0.2287	0.3071	0.4255	5.141	87.65	25.62	113.8
4016	24.15	43.39	72.49	3.674	11.6	23.38	3.553	0.4263	3.517	0.2296	128.6	0.2699	0.3016	0.4023	5.429	92.86	26.73	119.6
4017	24.39	43.63	72.8	3.535	11.66	23.11	3.519	0.4376	3.47	0.2223	130.7	0.2489	0.2959	0.3981	5.29	97.04	29.41	126.8
4018	23.65	42.81	72.99	3.661	11.67	23.62	3.577	0.4577	3.496	0.2294	134.4	0.2437	0.304	0.3995	5.131	96.85	27.35	124
4019	24	43.67	72.48	3.693	11.6	23.49	3.564	0.4299	3.515	0.2285	130.5	0.2706	0.3041	0.4	5.398	92.99	26.22	119.1
4021	24.05	43.36	73.05	3.664	11.69	23.46	3.562	0.438	3.569	0.2258	132.3	0.2332	0.303	0.4151	5.456	95.94	26.13	122
4023	23.95	43.52	72.71	3.641	11.63	23.5	3.568	0.4339	3.573	0.2272	137.4	0.2263	0.3058	0.4183	5.501	93.99	26.1	119.8
4024	23.92	43.73	72.59	3.741	11.62	23.83	3.616	0.4377	3.572	0.2301	127	0.2166	0.3002	0.402	5.437	90.53	24.45	114.2
4025	24.13	43.62	72.66	3.612	11.64	23.5	3.563	0.4295	3.534	0.238	130	0.2324	0.3022	0.3997	5.348	90.83	27.3	118.8
4026	24.2	43.99	72.43	3.678	11.59	23.46	3.562	0.4587	3.493	0.229	139.1	0.2505	0.3029	0.4021	5.133	91.13	26.16	117.5
4029	23.82	43.47	72.58	3.666	11.62	23.69	3.597	0.4335	3.52	0.22	128.6	0.2484	0.3013	0.4078	5.439	92.22	25.49	117.8
4031	23.42	42.37	73.14	3.708	11.7	23.64	3.587	0.4452	3.55	0.2241	132.7	0.2648	0.3035	0.4112	5.371	99.99	27.52	127.7
4032	24.25	43	72.79	3.561	11.64	23.1	3.513	0.4129	3.554	0.2257	132.6	0.2576	0.3058	0.4005	5.627	97.17	29.57	127.6
4033	23.78	43.29	72.98	3.628	11.68	23.21	3.526	0.4391	3.479	0.22	130.3	0.2289	0.3029	0.3963	5.282	96.21	31.41	129.7
4034	23.87	43.46	72.97	3.66	11.69	23.72	3.593	0.4275	3.538	0.2351	129.7	0.2426	0.3044	0.4224	5.402	92.94	25.43	117.8
4035	23.93	43.24	72.9	3.603	11.67	23.24	3.528	0.4065	3.565	0.2116	133.2	0.1998	0.3005	0.394	5.877	96.89	31.02	129.6
4036	24.07	43.88	72.3	3.66	11.57	23.53	3.567	0.4414	3.476	0.2344	134.8	0.2561	0.3028	0.4011	5.18	90.72	26.34	117.5
4037	24.5	44.33	72.14	3.652	11.54	23.36	3.55	0.4589	3.568	0.2406	138.4	0.24	0.3071	0.4288	5.21	92.48	26.77	119.3
4039	23.92	42.87	72.69	3.628	11.63	23.33	3.543	0.4482	3.439	0.2308	135.6	0.2235	0.3026	0.397	5.064	96.49	29.52	127.1
4040	24.14	42.92	72.86	3.645	11.66	23.27	3.533	0.453	3.558	0.2298	131.4	0.2541	0.307	0.4183	5.316	98.07	27.66	126
4042	23.82	43.72	72.68	3.664	11.64	23.51	3.572	0.435	3.573	0.2223	140.9	0.1984	0.3062	0.4145	5.517	92.95	28.78	123.5
4043	24.42	44.34	72.07	3.643	11.53	23.64	3.587	0.4442	3.549	0.2186	127.5	0.271	0.3001	0.4093	5.424	90.96	23.42	113.4
4044	23.98	43.58	72.43	3.703	11.59	23.42	3.556	0.4518	3.52	0.2345	136.4	0.2174	0.3031	0.4111	5.213	92.57	26.46	118.9
4045	24.32	44.47	72.4	3.558	11.58	23.29	3.541	0.4391	3.555	0.2335	133.6	0.2298	0.2999	0.4013	5.371	95.18	27.01	121.9
4046	23.9	43.53	72.68	3.633	11.62	23.21	3.528	0.4457	3.534	0.2337	130.3	0.2874	0.3075	0.4185	5.256	105.4	28.07	133.5
4047	24.19	43.97	72.31	3.724	11.58	23.55	3.566	0.4328	3.558	0.2344	127.1	0.2355	0.3039	0.3997	5.425	91.68	25.09	116.4
4048	23.95	43.2	72.72	3.655	11.64	23.53	3.568	0.4437	3.534	0.2197	137.7	0.2326	0.3044	0.4121	5.39	96.24	26.51	122.6
4049	24.18	44.49	71.99	3.652	11.52	23.31	3.538	0.4321	3.526	0.2335	133.2	0.2542	0.303	0.4015	5.371	92.21	26.2	118.3
4050	23.84	43.3	72.87	3.723	11.66	23.73	3.594	0.4526	3.555	0.2252	132.8	0.2306	0.3068	0.417	5.321	94.39	25.7	119.5
4052	23.84	43.39	72.71	3.669	11.64	23.56	3.569	0.4495	3.496	0.2228	132.2	0.2391	0.3051	0.4028	5.238	95.32	26.51	121.7
4053	23.99	44.32	72.44	3.697	11.59	23.85	3.615	0.4356	3.648	0.2277	131.5	0.2244	0.3037	0.4231	5.632	87.02	24.86	111.8
4054	24.35	43.65	72.49	3.617	11.6	23.1	3.508	0.4503	3.444	0.2286	131.9	0.2401	0.294	0.3762	5.099	97.86	27.65	125.2
4055	24.18	43.87	72.26	3.724	11.57	23.61	3.586	0.4334	3.55	0.239	132.9	0.2735	0.3035	0.392	5.357	89.72	25.17	114.9
4056	24.14	43.42	72.66	3.732	11.63	23.29	3.543	0.4378	3.738	0.2345	135.9	0.2414	0.3011	0.4294	5.684	94.74	26.6	121.7
4057	24.44	44.09	72.46	3.672	11.6	23.64	3.586	0.4391	3.581	0.2194	131	0.2191	0.3042	0.4128	5.517	90.1	24.69	114.7
4058	23.99	43.04	72.69	3.673	11.63	23.53	3.571	0.4442	3.562	0.2208	132.8	0.2333	0.3042	0.4092	5.439	93.18	26.69	120
4059	24.04	43.71	72.52	3.673	11.61	23.48	3.571	0.4562	3.573	0.229	134.5	0.2382	0.306	0.4257	5.321	90.63	26.11	116.9
4060	24.17	44.5	72.13	3.569	11.54	23.23	3.534	0.4485	3.484	0.2328	134.3	0.2909	0.3009	0.4053	5.143	93.32	25.68	117.9
4062	24.17	43.41	73.01	3.644	11.68	23.64	3.591	0.4342	3.571	0.2186	134.6	0.2216	0.3007	0.398	5.518	95.33	25.16	119.8
4064	24.07	43.56	72.85	3.653	11.67	23.3	3.542	0.4328	3.429	0.2333	126.7	0.241	0.3007	0.395	5.137	92.25	27.32	120
4065	24.03	43.55	72.6	3.689	11.63	23.48	3.557	0.4497	3.539	0.2216	138.6	0.228	0.3044	0.4117	5.31	91.41	26.52	117.6
4066	23.92	43.34	72.66	3.624	11.62	23.28	3.54	0.439	3.532	0.2147	140	0.2402	0.3054	0.4129	5.462	94.23	27.5	121.7
4067	24.03	43.71	72.6	3.655	11.61	23.39	3.552	0.4251	3.452	0.2225	125.4	0.2748	0.3035	0.405	5.38	91.68	25.78	117.1
4068	23.94	43.4	72.77	3.616	11.63	23.59	3.58	0.4193	3.584	0.2257	134.9	0.199	0.2966	0.3866	5.637	92.56	26.86	120.1
4069	24.27	43.8	72.3	3.63	11.58	23.19	3.534	0.494	3.475	0.2271	139.4	0.2299	0.3059	0.3918	4.927	93.25	28.45	122.6
4070	24.04	44.01	72.41	3.685	11.59	23.43	3.561	0.4295	3.526	0.2205	127.8	0.2451	0.3035	0.4037	5.489	92.06	26.34	118.4
4071	23.98	43.62	72.51	3.678	11.6	23.42	3.558	0.4386	3.551	0.2267	132.6	0.2041	0.3066	0.4214	5.416	90.8	25.86	117
4072	23.9	43.43	72.79	3.666	11.65	23.31	3.547	0.4598	3.477	0.2178	134.7	0.1857	0.3018	0.4173	5.171	96.44	26.72	122.8
4073	24.14	44.09	72.02	3.682	11.52	23.23	3.525	0.4475	3.482	0.2371	138.4	0.2429	0.3001	0.4028	5.132	92.7	25.82	118.3
4074	24.01	43.52	72.62	3.73	11.63	23.68	3.6	0.4344	3.502	0.2319	133.3	0.2377	0.303	0.4078	5.296	90.97	25.81	116.9
4075	24.23	44.04	72.27	3.673	11.56	23.69	3.586	0.4416	3.515	0.233	136.3	0.2573	0.3039	0.3995	5.254	88.11	23.89	111.3
4077	23.96	43.57	72.72	3.684	11.65	23.53	3.574	0.445	3.554	0.2218	133.4	0.2429	0.3046	0.4016	5.407	92.4	26.24	118.9
4079	24.15	44.49	72.7	3.64	11.63	23.62	3.582	0.4229	3.575	0.2222	124.4	0.174	0.3042	0.4118	5.628	92.04	24.73	115.9
4080	23.92	43.07	72.84	3.663	11.65	23.55	3.573	0.4125	3.498	0.2262	127.7	0.2288	0.3065	0.3818	5.564	94.84	26.9	121.8
4082	23.82	42.98	72.95	3.743	11.67	24.09	3.652	0.4236	3.609	0.2239	140.1	0.227	0.3077	0.4177	5.697	91.86	24.54	115.8
4083	25.06	44.93	70.56	3.687	11.28	22.73	3.462	0.4784	3.312	0.2442	153.5	0.2408	0.3002	0.3754	4.61	86.57	28.26	116.2
4086	24.04	44.21	72.41	3.635	11.58	23.35	3.54	0.4265	3.453	0.2296	129.2	0.2699	0.3002	0.3997	5.247	93.06	25.89	119.2
4087	24.55	45.03	71.59	3.63	11.45	22.95	3.489	0.4599	3.35	0.2204	131.5	0.2681	0.3017	0.4059	4.928	92.48	25.73	118
4088	24.14	43.28	72.69	3.668	11.64	23.56	3.569	0.4425	3.472	0.2208	129.6	0.2199	0.3116	0.4056	5.273	92.88	25.39	118.4
4089	23.92	43.07	73.02	3.686	11.69	23.88	3.619	0.4434	3.521	0.2231	132.9	0.2502	0.3074	0.4362	5.325	94.69	25.54	120
4090	23.94	43.11	72.89	3.735	11.66	23.61	3.587	0.4401	3.56	0.2224	131.6	0.235	0.3065	0.4107	5.465	95.74	26.31	121.2
4092	24.21	44	72.67	3.658	11.62	23.53	3.576	0.4359	3.555	0.2243	132.9	0.2283	0.3064	0.4233	5.482	91.96	26.25	118.1
4095	23.96	43.8	72.89	3.692	11.66	23.64	3.591	0.4233	3.536	0.2291	129.6	0.2972	0.3044	0.4252	5.452	94.29	24.84	117.7
4096	24.16	43.75	72.52	3.681	11.6	23.69	3.591	0.435	3.465	0.2295	129.6	0.2336	0.3	0.4015	5.249	91.53	25.04	116.3
4097	24.19	44.03	72.66	3.666	11.64	23.42	3.564	0.4298	3.454	0.2121	132.6	0.2317	0.3034	0.4091	5.397	97.87	25.84	123.8
4098	23.88	43.52	72.75	3.65	11.64	23.46	3.557	0.4564	3.508	0.2303	134.9	0.243	0.3062	0.4246	5.154	94.21	25.31	118.9
4099	23.88	42.98	72.78	3.578	11.65	23.74	3.605	0.4533	3.495	0.2295	144.7	0.2481	0.3099	0.4359	5.16	96.34	25.74	121.3
4101	24.01	43.47	72.86	3.6	11.65	23.31	3.545	0.4298	3.421	0.2215	131.8	0.2487	0.3079	0.4077	5.253	99.41	27.1	125.8
4102	23.73	42.64	73.07	3.634	11.69	23.28	3.54	0.4272	3.504	0.2253	137.6	0.2063	0.3027	0.4012	5.393	102.04	28.71	130.7
4103	24.15	43.69	72.49	3.662	11.59	23.42	3.557	0.4508	3.499	0.2256	136	0.2354	0.304	0.4019	5.23	91.26	25.79	116.2
4104	24.21	44.19	72.11	3.618	11.54	23.42	3.557	0.449	3.545	0.2437	135.1	0.2642	0.3031	0.412	5.205	90.73	26.53	117.2
4108	24.23	42.95	72.94	3.629	11.66	23.45	3.559	0.4051	3.444	0.2025	123.3	0.2671	0.3023	0.3909	5.673	97.68	27.14	125.1
4109	24.2	43.94	72.5	3.635	11.6	23.71	3.596	0.4296	3.613	0.227	138.6	0.2384	0.3074	0.4098	5.625	89.59	26.01	116.2
4110	23.86	43.57	72.75	3.661	11.65	23.47	3.559	0.4343	3.542	0.2207	129.9	0.2182	0.2996	0.3859	5.496	98.57	26.52	124.6
4111	24.14	43.55	72.57	3.651	11.61	23.42	3.557	0.4252	3.514	0.2193	131.2	0.2675	0.3033	0.3992	5.522	92.76	26.65	119.6
4112	23.92	42.91	73.1	3.702	11.7	23.66	3.591	0.4087	3.467	0.2172	120.8	0.2468	0.2996	0.3942	5.531	96.46	26.3	122.6
4115	24.24	43.52	72.54	3.657	11.6	23.29	3.535	0.4389	3.509	0.2308	136	0.2724	0.3071	0.4117	5.272	94.83	26.93	121.8
4116	24.09	43.34	72.72	3.67	11.63	23.53	3.569	0.421	3.551	0.2246	129.8	0.2488	0.3018	0.4097	5.619	93.15	26.55	119.8
4119	24.15	43.54	72.53	3.654	11.61	23.28	3.539	0.4365	3.472	0.2282	127	0.2657	0.3021	0.3824	5.219	94.12	26.47	120.4
5001	24.33	43.88	72.05	3.664	11.53	23.37	3.54	0.4567	3.456	0.2153	133.9	0.3089	0.2983	0.4041	5.192	86.62	27.15	114
5002	24.31	43.56	72.52	3.658	11.59	23.28	3.531	0.468	3.401	0.2175	137	0.239	0.3065	0.3879	5.071	97.51	29.18	126.8
5003	23.93	42.18	73.55	3.601	11.77	23.49	3.557	0.4357	3.304	0.2046	125.9	0.2465	0.2988	0.3996	5.164	103.69	32.1	136.8
5005	23.78	43.34	72.95	3.655	11.67	23.65	3.591	0.456	3.351	0.2184	128.5	0.4058	0.3116	0.403	4.996	94.02	25.13	118.3
5006	24.05	43.68	72.48	3.767	11.6	23.41	3.549	0.4542	3.42	0.2182	131.8	0.2382	0.2977	0.3913	5.089	94.5	24.6	118.9
5007	24.1	43.13	72.99	3.692	11.69	23.52	3.568	0.433	3.513	0.2068	129.6	0.2602	0.3075	0.3898	5.484	98.17	25.51	123.2
5008	24.56	44.25	71.65	3.643	11.46	23.29	3.539	0.4527	3.347	0.2341	131	0.2891	0.2968	0.3873	4.879	88.38	24.56	112.8
5009	24.43	44.28	72.16	3.675	11.54	23.5	3.573	0.4492	3.444	0.2236	129.7	0.2958	0.3056	0.3976	5.162	90.53	26.16	116.9
5010	24.11	43.07	72.99	3.637	11.68	23.11	3.505	0.4719	3.531	0.228	131.7	0.2693	0.3081	0.3972	5.147	96.09	29.16	126.1
5012	23.98	42.82	72.93	3.75	11.67	23.7	3.592	0.4477	3.599	0.219	129.9	0.2217	0.309	0.4012	5.484	101.11	27.55	128.1
5013	24.34	43.1	72.31	3.628	11.57	23.31	3.541	0.4628	3.428	0.2176	143.8	0.2461	0.2994	0.4051	5.099	92.66	27.76	120.9
5014	24.09	43.71	72.21	3.637	11.55	23.44	3.561	0.4259	3.409	0.2289	134.8	0.2665	0.3048	0.3978	5.186	94.72	26.91	121.6
5015	23.87	42.39	72.73	3.677	11.63	23.78	3.609	0.4173	3.548	0.2261	139.1	0.3164	0.2934	0.4017	5.545	96.38	26.55	123.4
5016	23.91	43.37	72.25	3.661	11.57	23.32	3.544	0.4455	3.372	0.2269	135.2	0.3174	0.2982	0.3867	4.989	94.68	27.29	122.8
5017	24.39	43.52	71.59	3.713	11.46	23.38	3.556	0.4574	3.408	0.2265	125	0.3531	0.3041	0.4228	5.024	92.8	25.51	117.8
5018	24.05	43.97	72.34	3.644	11.57	23.35	3.544	0.4276	3.336	0.224	124.7	0.3455	0.3021	0.3923	5.041	91.13	28.21	120.7
5019	23.92	42.51	72.65	3.753	11.63	23.57	3.585	0.4422	3.505	0.2232	131.3	0.2435	0.3038	0.394	5.303	95.98	27.86	124.8
5020	24.05	43.15	72.52	3.674	11.61	22.96	3.491	0.4477	3.452	0.2079	125.8	0.2666	0.2991	0.4003	5.283	95.85	28.77	125.1
5021	23.99	43.26	72.43	3.599	11.59	23.43	3.546	0.4176	3.429	0.2306	125.2	0.2853	0.3088	0.403	5.275	94.62	25.79	120.9
5022	23.71	43.03	72.44	3.688	11.6	23.55	3.562	0.4783	3.458	0.2276	144.8	0.2491	0.3021	0.4105	5.02	91.79	26.17	118
5023	23.54	43.21	72.73	3.802	11.63	23.77	3.6	0.4271	3.466	0.2181	124.4	0.2916	0.3015	0.3918	5.334	92.94	23.84	116.5
5024	23.92	44.15	72.45	3.673	11.6	23.33	3.546	0.416	3.421	0.2234	129.7	0.2486	0.3033	0.3897	5.277	92.04	27.6	120.8
5025	24.41	43.51	72.27	3.589	11.56	22.93	3.485	0.4594	3.291	0.2142	134.9	0.3114	0.2967	0.3911	4.903	92.52	29.7	123.9
5027	23.95	43.16	72.32	3.652	11.57	23.81	3.617	0.4485	3.387	0.2261	138.2	0.3297	0.3108	0.4111	5.068	88.98	23.77	112.5
5028	24.22	43.89	71.78	3.792	11.48	23.3	3.54	0.4463	3.482	0.2219	122	0.251	0.3071	0.3945	5.247	86.26	28.05	115.4
5029	24.11	43.68	71.98	3.84	11.52	23.82	3.618	0.4266	3.486	0.2236	121.9	0.3464	0.2997	0.399	5.371	86.97	23.47	109.7
5030	23.68	43.41	72.49	3.765	11.59	23.66	3.587	0.4162	3.373	0.2082	125	0.3754	0.3037	0.3954	5.341	92.94	27.04	120.1
5031	23.99	42.89	72.55	3.633	11.62	23.11	3.511	0.4194	3.578	0.2076	140.7	0.2284	0.3032	0.3852	5.713	92.65	28.29	121.7
5032	24.2	43.06	72.77	3.597	11.64	23.42	3.549	0.448	3.482	0.2192	135.7	0.2517	0.3088	0.4059	5.289	94.88	26.17	121.4
5033	24.07	43.15	72.11	3.616	11.54	23.04	3.495	0.4646	3.467	0.2167	148.5	0.3131	0.3114	0.4059	5.152	95.75	30.5	127.5
5034	23.77	43.52	72.39	3.675	11.58	23.85	3.624	0.4446	3.513	0.2255	127.1	0.295	0.309	0.4136	5.291	87.81	26.02	114.3
5035	24	43.32	72.14	3.711	11.54	23.14	3.517	0.4752	3.403	0.228	142.6	0.3009	0.3047	0.3995	5.021	94.27	30.11	125.5
5037	23.88	44.2	72.25	3.64	11.56	23.48	3.564	0.4319	3.461	0.2188	135.7	0.2845	0.3022	0.385	5.276	91.81	26.74	119
5038	24.19	43.65	72.62	3.61	11.63	22.91	3.492	0.4397	3.326	0.2141	139.4	0.3352	0.3051	0.3811	5.04	94.21	29.24	124
5039	24.44	43.83	72.39	3.695	11.59	23.38	3.545	0.4592	3.43	0.2163	131.5	0.3129	0.3037	0.3973	5.123	94.69	27.83	122.5
5040	23.73	43.2	72.69	3.691	11.63	23.31	3.546	0.4418	3.458	0.2126	125.8	0.2531	0.3019	0.385	5.277	99.81	30.94	131.9
5043	23.83	42.96	72.62	3.653	11.62	23.29	3.538	0.4644	3.419	0.2322	135.7	0.3267	0.3072	0.4253	5	98.12	27.36	125.8
5044	23.57	43.33	72.28	3.715	11.56	23.69	3.599	0.4476	3.441	0.2279	131.6	0.29	0.3031	0.3937	5.152	92.92	24.99	117.5
5045	24.12	43.57	71.88	3.627	11.5	23.26	3.524	0.4349	3.399	0.2311	146.4	0.2586	0.3024	0.3863	5.1	91.68	26.54	118
5046	23.86	43.45	73.09	3.732	11.7	23.74	3.599	0.4604	3.375	0.2173	132.2	0.3185	0.3016	0.3693	5.012	93.14	26.89	119.9
5047	23.73	42.45	72.77	3.747	11.63	23.6	3.583	0.4603	3.384	0.2201	130.2	0.3097	0.2983	0.3998	5	94.54	29.39	125.4
5048	23.67	42.61	73.27	3.724	11.74	23.23	3.528	0.4492	3.448	0.2058	131.6	0.2168	0.3069	0.3809	5.276	104.94	31.93	138.5
5049	24.13	43.2	72.62	3.685	11.62	23.58	3.591	0.455	3.462	0.2214	124.7	0.3094	0.3154	0.4051	5.201	97.4	27.6	125.3
5051	24.07	43.08	72.23	3.787	11.56	23.39	3.564	0.4457	3.541	0.229	127.1	0.2706	0.3002	0.3949	5.288	97.51	27.9	126.1
5052	24.59	45.35	71.28	3.596	11.4	23.32	3.542	0.4443	3.586	0.2402	140.6	0.2308	0.3005	0.4118	5.378	83.85	22.74	105.1
5054	24.05	43.64	72.32	3.67	11.58	23.43	3.564	0.4404	3.464	0.2226	133.9	0.289	0.3058	0.3962	5.239	93.62	26.46	120.2
5055	24.6	44.78	71.24	3.634	11.39	23.19	3.534	0.3977	3.481	0.2347	137	0.2738	0.3047	0.3904	5.477	89.67	26.45	116.8
5056	23.79	43.61	71.32	3.834	11.41	23.5	3.564	0.4591	3.494	0.2412	131.6	0.3449	0.3165	0.4152	5.097	90.83	24.34	114.6
5057	23.92	43.55	72.26	3.739	11.56	23.18	3.524	0.4256	3.582	0.2274	122.9	0.2589	0.2964	0.3893	5.503	95.58	29.15	125.4
5058	23.61	43.31	72.28	3.79	11.58	23.63	3.584	0.4375	3.484	0.2269	134.3	0.2854	0.3089	0.4171	5.252	95.6	26.05	120.7
5060	25.08	45.71	70.99	3.523	11.35	23.03	3.497	0.4391	3.522	0.2568	137.2	0.2679	0.3016	0.4089	5.141	86.49	21.04	105.9
5061	23.84	44.2	72.35	3.78	11.58	23.38	3.551	0.4688	3.472	0.2264	131.8	0.316	0.3056	0.4213	5.069	91.9	24.48	116.5
5062	24.19	43.06	72.08	3.672	11.53	23.3	3.543	0.4549	3.543	0.2327	132.5	0.2655	0.3008	0.3861	5.215	91.17	30.49	123
5063	23.49	43.46	72.44	4.177	11.59	24.05	3.654	0.4752	3.615	0.2222	126.6	0.1897	0.3056	0.3987	5.33	95.7	24.93	120.1
5064	23.58	43.27	72.66	3.706	11.62	23.56	3.575	0.4539	3.418	0.2254	136	0.3375	0.2996	0.4013	5.08	98.78	28.12	127.8
5065	23.26	42.14	73.12	3.751	11.7	23.43	3.551	0.4531	3.482	0.228	139.4	0.243	0.3101	0.4026	5.171	100.47	33.75	136.1
5066	23.75	43.23	72.89	3.67	11.67	23.37	3.546	0.4205	3.379	0.2177	125.9	0.3086	0.302	0.3861	5.237	94.96	30.82	126.7
5067	23.84	43.91	72.57	3.765	11.61	23.33	3.542	0.4497	3.496	0.2285	130.6	0.2396	0.3077	0.3913	5.226	100.47	25.06	124.5
5068	23.71	42.57	73.51	3.687	11.78	24.01	3.636	0.4273	3.589	0.2121	123.5	0.2567	0.2938	0.3844	5.654	99.74	25.56	125
5069	23.73	43.35	72.36	3.769	11.59	23.59	3.577	0.4481	3.49	0.229	128.7	0.276	0.304	0.3974	5.221	95.25	25.95	120.8
5070	23.44	42.85	73.31	3.844	11.74	23.84	3.622	0.4088	3.511	0.2144	120.1	0.2699	0.3035	0.3945	5.622	95.56	29.45	126
5071	23.67	43.35	73.2	3.814	11.71	23.74	3.605	0.4478	3.66	0.2196	126.1	0.219	0.2984	0.3875	5.544	94.22	30.08	125.3
5072	23.96	43.39	72.5	3.844	11.6	23.76	3.606	0.4316	3.537	0.2362	128.2	0.3382	0.3107	0.3986	5.371	91.54	24.85	116.7
5073	23.69	43.46	72.92	3.722	11.67	23.67	3.597	0.4549	3.533	0.2258	130.6	0.2441	0.3027	0.389	5.301	95.5	26.15	121.9
5074	24.02	43.93	72.31	3.68	11.58	23.79	3.618	0.4814	3.579	0.2179	145.5	0.2467	0.3076	0.402	5.184	93	22.2	113.7
5075	23.8	43.84	72.55	3.74	11.6	23.6	3.584	0.4496	3.447	0.2199	141.5	0.3262	0.3085	0.3868	5.167	94.93	27.13	122.2
5076	23.84	43.02	72.31	3.702	11.57	23.45	3.565	0.4737	3.471	0.2336	134.4	0.3069	0.3038	0.3919	5.028	93.08	26.63	119.7
5077	24.29	43.37	73.01	3.76	11.68	23.67	3.584	0.4597	3.465	0.2237	132.2	0.3587	0.318	0.4156	5.133	93.43	23.59	116.7
5078	24.28	43.78	72.24	3.703	11.56	23.62	3.589	0.4571	3.541	0.2349	131.1	0.2363	0.3061	0.4038	5.23	91.25	23.55	114.4
5079	23.73	42.76	72.79	3.776	11.66	23.55	3.563	0.4496	3.492	0.2272	133.7	0.217	0.3	0.3918	5.215	101.74	29.82	132.1
5080	24.3	43.9	72.19	3.675	11.55	22.91	3.484	0.4563	3.515	0.2266	128.2	0.2582	0.2979	0.3771	5.152	91.59	29.01	121.3
5081	23.71	43.4	72.93	3.543	11.67	23.16	3.503	0.4694	3.416	0.2097	133.6	0.3224	0.3078	0.4015	5.07	94.79	28.64	124.5
5082	24.06	43.08	73.18	3.764	11.71	23.67	3.582	0.4207	3.48	0.2145	127.6	0.324	0.3153	0.4	5.469	100.01	28.58	128.8
5083	23.99	42.99	72.45	3.783	11.59	23.46	3.559	0.4427	3.525	0.2268	126.4	0.271	0.3109	0.4102	5.307	89.97	26.94	117.4
5084	24.18	43.45	72.09	3.657	11.54	23.23	3.53	0.4346	3.449	0.2306	131.6	0.3446	0.3102	0.4049	5.193	95.44	28	123.9
5085	24.13	43.48	72.63	3.759	11.63	23.37	3.547	0.4585	3.583	0.2182	132.2	0.2369	0.3095	0.4022	5.317	97.23	26.92	123.8
5086	24.14	43.78	72.36	3.767	11.58	23.79	3.608	0.4686	3.567	0.2353	128.7	0.3504	0.3067	0.4056	5.175	91.53	22.05	112.2
5087	23.99	43.57	72.43	3.708	11.58	23.16	3.517	0.4401	3.48	0.232	133.2	0.3069	0.3055	0.4042	5.215	99.07	27.39	126.8
5088	24.32	43.53	71.95	3.683	11.52	23.24	3.535	0.4344	3.457	0.2355	120.5	0.3351	0.3041	0.3986	5.172	90.34	29.43	120.8
5089	23.66	42.71	73.11	3.714	11.69	23.51	3.566	0.451	3.518	0.2245	136.3	0.281	0.309	0.4007	5.27	99.32	30.46	130
5090	23.81	42.73	73.47	3.672	11.75	23.34	3.538	0.4167	3.489	0.2138	130.5	0.2578	0.2991	0.3794	5.502	99.94	35.85	138.2
5092	24.43	44.06	72	3.688	11.52	23.55	3.566	0.4583	3.505	0.2264	127.6	0.3779	0.3011	0.3992	5.179	94.61	24.9	119.6
5093	24.79	44.6	71.68	3.652	11.46	23.41	3.548	0.459	3.4	0.2349	128.2	0.3137	0.3094	0.4041	4.979	84.34	20.9	104.9
5095	24.27	43.62	72.76	3.69	11.64	23.81	3.626	0.4522	3.63	0.2289	133.7	0.22	0.3013	0.3886	5.426	91.72	24.58	115.6
5096	23.64	42.71	72.63	3.793	11.62	23.62	3.589	0.4372	3.401	0.2269	129.2	0.2678	0.2976	0.3961	5.092	97.36	27.87	125.3
5097	24.34	43.15	73.03	3.68	11.67	23.49	3.574	0.4479	3.483	0.2179	134.7	0.2203	0.2963	0.3942	5.229	99.01	27.69	126.2
5098	23.66	43.64	72.28	3.751	11.55	23.76	3.603	0.4369	3.507	0.2349	131.6	0.2703	0.3096	0.4085	5.23	91.32	26.13	117.8
5099	23.69	42.46	73.06	3.66	11.69	23.58	3.577	0.4788	3.453	0.2193	137.3	0.2408	0.3091	0.3934	5.024	104.21	28.09	132.1
5100	24.43	44.07	72.5	3.594	11.6	23.23	3.523	0.4724	3.518	0.2196	133	0.2674	0.304	0.4041	5.148	94.33	26.72	121.4
5101	24.11	43.63	72.67	3.692	11.63	23.43	3.553	0.471	3.524	0.2298	140.4	0.2321	0.3179	0.4159	5.13	94.24	26.48	121
5102	24.14	43.35	72.66	3.599	11.63	23.2	3.524	0.4117	3.258	0.2309	127.5	0.3284	0.2954	0.3793	4.973	97.1	31.18	130.1
5103	23.62	42.66	72.86	3.765	11.66	23.71	3.596	0.4492	3.46	0.2202	137.2	0.2803	0.3083	0.3919	5.188	100.45	25.81	125.7
5104	23.82	42.69	73.73	3.607	11.8	23.62	3.582	0.4342	3.485	0.2062	128.3	0.2879	0.2981	0.3913	5.444	101.87	33.33	136
5105	23.67	43.6	73.08	3.703	11.69	23.74	3.606	0.4409	3.512	0.2234	131.7	0.3402	0.3031	0.3996	5.31	92.12	27.2	119.7
5108	24.05	43.86	72.23	3.815	11.56	23.64	3.592	0.4736	3.536	0.2234	129.1	0.2286	0.3072	0.4141	5.149	92.34	26.3	118.3
5109	24.19	42.96	72.87	3.691	11.67	23.23	3.529	0.4457	3.485	0.2059	126.3	0.2255	0.2976	0.381	5.362	94.14	33.42	130.6
5110	23.73	43.11	73.3	3.683	11.74	23.16	3.519	0.4147	3.538	0.2032	126.4	0.2267	0.3015	0.3836	5.726	99.79	31.82	133.6
5111	24.04	42.7	72.76	3.638	11.64	23.47	3.561	0.4531	3.516	0.2358	129.9	0.3249	0.3045	0.4184	5.198	94.05	27.67	122.3
5112	23.84	43.65	72.6	3.783	11.62	24.06	3.644	0.4349	3.525	0.2266	130.6	0.2564	0.3162	0.408	5.389	90.08	23.37	113
5113	24	43.93	72.66	3.737	11.63	23.62	3.59	0.4884	3.582	0.2283	132.5	0.2498	0.2999	0.3843	5.101	96.93	23.91	119.8
5114	24.48	43.16	72.85	3.63	11.66	23.58	3.579	0.4637	3.514	0.2233	144.8	0.242	0.3054	0.4292	5.227	90.74	24.4	114.7
5115	24.37	44.03	72.63	3.587	11.62	23.63	3.579	0.4126	3.47	0.2418	134.3	0.2802	0.3038	0.4137	5.271	94.68	23.55	117.3
5116	24.16	43.66	72.77	3.619	11.65	23.46	3.554	0.4199	3.489	0.2276	136.2	0.2346	0.3103	0.4324	5.347	91.31	27.98	121
5117	23.94	43.33	73.1	3.618	11.69	23.38	3.55	0.4214	3.464	0.2138	123	0.2148	0.3026	0.3766	5.404	98.16	28.25	126.6
5119	24.31	43.59	72.53	3.58	11.6	23.19	3.525	0.4354	3.489	0.2204	125	0.296	0.2996	0.3893	5.315	98.6	29.74	129.3
5120	23.64	42.62	73.12	3.728	11.7	23.79	3.604	0.439	3.485	0.2259	122.4	0.3241	0.3086	0.4028	5.259	94.94	25.87	120.2

## Sheet: Aorangi
Ptype ID	ADF	NDF	DOMD	Cfat	ME	CP	N	Ca	K	Mg	Mn	Na	P	S	LMW_WSC	HMW_WSC	Total_WSC	Tetany ratio
1001	22.79	41.26	74.17	3.594	11.87	26.41	3.971	0.4376	3.624	0.233	124.6	0.1843	0.2895	0.4603	94.1	17.96	112	2.277
1002	23.13	41.83	73.98	3.483	11.84	25.64	3.869	0.4179	3.636	0.2435	108.4	0.1715	0.2728	0.399	94.92	18.93	113.6	2.275
1003	23.81	42.57	73.22	3.702	11.71	26.33	3.96	0.43	3.522	0.2362	110.3	0.2187	0.2863	0.4054	90.18	17.65	107.1	2.21
1004	23.88	42.29	73.27	3.765	11.73	26.21	3.949	0.4377	3.583	0.2312	118.4	0.2008	0.2807	0.4242	89.73	19.5	108.2	2.251
1006	24.4	43.01	72.62	3.478	11.61	26.04	3.914	0.4025	3.432	0.2458	120.4	0.1995	0.286	0.4075	87.66	16.24	102.7	2.224
1008	23.98	42.67	74.06	3.776	11.85	26.39	3.997	0.3952	3.586	0.219	102.1	0.1866	0.2927	0.3814	89.78	19.15	107.7	2.435
1009	23.41	41.93	73.88	3.672	11.83	26.21	3.953	0.4204	3.663	0.2319	118.3	0.1949	0.2863	0.4292	91.12	20.53	110.3	2.362
1010	24.17	42.8	72.26	3.591	11.57	25.57	3.86	0.4442	3.526	0.2475	126.6	0.2122	0.2807	0.3958	88.24	18.08	104.9	2.167
1011	22.86	41.45	74.4	3.609	11.91	26.44	3.976	0.4279	3.53	0.2308	120	0.1927	0.2907	0.4143	93.4	16.57	110.3	2.251
1013	23.38	41.73	74.11	3.67	11.85	26.48	3.985	0.429	3.641	0.2215	117	0.1982	0.2911	0.4169	91.88	20.05	110.9	2.349
1014	24.06	42.4	73.96	3.642	11.83	26.32	3.979	0.42	3.715	0.2306	115.8	0.1814	0.2857	0.4183	88.17	17.6	104.5	2.385
1015	23.18	41.58	73.57	3.526	11.76	25.77	3.862	0.4733	3.64	0.2669	130.3	0.2133	0.295	0.4265	97.15	18.6	116	2.144
1017	23.42	41.17	73.73	3.445	11.81	25.43	3.824	0.4527	3.441	0.2325	126.4	0.1874	0.2815	0.3936	98.57	19	118.6	2.155
1018	23.75	41.73	73.64	3.657	11.78	26.43	3.982	0.4502	3.56	0.2311	119	0.1759	0.2898	0.4184	95.53	17.9	113.8	2.194
1019	24.26	42.84	72.79	3.51	11.64	26.39	3.982	0.4488	3.538	0.2501	116.5	0.216	0.2926	0.4127	86.6	16.56	102	2.151
1020	24.16	42.9	72.88	3.549	11.66	25.78	3.88	0.427	3.538	0.2364	113.3	0.1996	0.2838	0.4038	92.14	18.76	110.5	2.25
1021	24.43	43.25	72.3	3.69	11.57	26.07	3.916	0.408	3.515	0.2295	111.2	0.2246	0.2909	0.3937	90.73	16.9	107.2	2.305
1023	23.48	41.91	74.15	3.536	11.87	25.79	3.871	0.4267	3.503	0.238	115.7	0.2088	0.2826	0.4273	94.23	18.05	112.3	2.191
1024	24	42.83	73.22	3.586	11.71	26.07	3.918	0.4434	3.602	0.2373	123.5	0.2248	0.2945	0.4316	93.65	17.36	110.9	2.253
1025	24.16	41.85	73.44	3.594	11.75	26.03	3.909	0.4176	3.525	0.2299	110.7	0.1999	0.2815	0.3905	88.06	18.16	104.9	2.284
1026	24.08	42.01	73.24	3.443	11.71	25.67	3.864	0.5002	3.43	0.2387	122.5	0.2165	0.2836	0.4017	95.08	16.91	112.6	2.064
1027	24.5	42.73	73.28	3.624	11.73	25.79	3.888	0.4051	3.595	0.2298	116.4	0.1903	0.2812	0.4107	94.78	21.58	116.1	2.323
1028	23.69	41.6	73.67	3.676	11.79	26.36	3.974	0.4272	3.578	0.2331	118.6	0.2174	0.2886	0.409	94.63	17.76	112.7	2.278
1030	22.75	41.76	73.13	3.527	11.69	25.44	3.822	0.4249	3.474	0.2348	117.1	0.1833	0.2721	0.4011	97.15	17.73	115.6	2.295
1031	23.71	42.41	73.64	3.756	11.77	26.6	3.993	0.4381	3.602	0.2255	116.4	0.1735	0.2956	0.4002	91.94	16.86	108	2.203
1032	22.82	40.86	74.43	3.62	11.92	26.26	3.947	0.4303	3.557	0.226	114.8	0.1852	0.2916	0.4188	99.64	17.03	118	2.281
1033	22.46	40.98	74.93	3.644	11.99	26.1	3.916	0.3799	3.659	0.2149	109.6	0.1386	0.2905	0.401	102.15	20.61	124	2.536
1037	23.16	41.83	73.64	3.584	11.78	25.7	3.865	0.4142	3.529	0.2217	118.1	0.2103	0.2837	0.4041	95.43	17.01	113.2	2.312
1038	23.56	41.8	73.56	3.635	11.77	26.21	3.948	0.4178	3.551	0.2249	110.5	0.1916	0.2882	0.4267	92.11	16.43	108.5	2.288
1039	23.9	42.6	73.09	3.476	11.7	25.59	3.844	0.4083	3.521	0.237	110.2	0.2002	0.2789	0.3952	95.47	16.93	113.2	2.259
1040	23.62	41.13	74.46	3.731	11.91	26.56	4.011	0.4114	3.662	0.2236	109.4	0.1647	0.2921	0.4211	98.73	18.63	118.2	2.44
1043	23.94	42.27	73.49	3.631	11.75	26.17	3.936	0.4459	3.506	0.245	116.9	0.218	0.2874	0.4139	93.13	17.93	110.5	2.145
1044	23.97	42.34	73.57	3.703	11.77	26.32	3.971	0.4125	3.599	0.2368	117.8	0.2019	0.2887	0.418	91.81	17.95	109.2	2.3
1045	24.14	42.34	73.06	3.669	11.69	26.02	3.931	0.4289	3.508	0.2267	118	0.1843	0.2924	0.4347	91.13	16.82	107.5	2.238
1047	23.85	41.56	73.84	3.629	11.82	25.81	3.884	0.4345	3.564	0.2372	114.1	0.2036	0.2882	0.4075	98.86	18.2	118.6	2.267
1048	23.72	42.32	73.93	3.568	11.84	25.7	3.878	0.4266	3.555	0.2189	111.6	0.2037	0.2779	0.3638	100.12	17.65	118.9	2.367
1049	23.74	42.51	73.23	3.522	11.71	25.76	3.868	0.4236	3.492	0.2313	114.6	0.2217	0.294	0.4059	92.54	18.49	110.4	2.228
1051	23.79	42.51	72.81	3.441	11.65	25.21	3.794	0.4596	3.493	0.2351	120.7	0.1916	0.2762	0.3808	94.84	20.46	115.1	2.166
1053	24.51	43.16	72.86	3.549	11.66	25.29	3.823	0.4331	3.62	0.2333	123.4	0.1957	0.2714	0.4089	95.94	17.28	113.6	2.318
1056	23.99	42.28	73.91	3.605	11.84	26.35	3.974	0.4269	3.605	0.2374	118.6	0.1983	0.2877	0.4058	91.77	18.28	109.3	2.292
1057	23.92	42.24	73.17	3.588	11.7	25.58	3.837	0.4182	3.566	0.2339	120	0.1843	0.2788	0.4195	91.22	21.22	111.3	2.284
1059	24.28	42.84	73.09	3.429	11.69	25.47	3.83	0.4186	3.484	0.2528	116.8	0.2439	0.2857	0.4184	88.11	17.43	104.2	2.163
1060	24.33	42.97	73.36	3.611	11.74	26.12	3.943	0.4248	3.709	0.2296	113.6	0.2015	0.2857	0.4068	85.29	16.27	99.7	2.391
1062	24.32	42.77	73.26	3.608	11.73	25.98	3.91	0.4238	3.546	0.2405	112.6	0.1887	0.2852	0.3976	90.73	18.57	108.3	2.258
1063	23.77	42.33	73.31	3.628	11.73	26.36	3.966	0.4421	3.569	0.2474	117.9	0.1987	0.291	0.4069	88.41	16.36	103.2	2.203
1064	24.4	42.75	73.75	3.646	11.8	26.43	3.989	0.4097	3.523	0.2321	112.7	0.2116	0.289	0.4155	84.24	16.29	98.9	2.292
1066	25.06	43.1	71.63	3.46	11.45	25.32	3.804	0.4819	3.445	0.2464	128.1	0.2328	0.2856	0.4267	87.94	16.24	103.4	2.057
1067	24.53	42.73	73.34	3.532	11.74	26.23	3.964	0.4571	3.537	0.2431	115.4	0.2184	0.2905	0.4085	89.76	17.32	106	2.173
1068	24.72	42.76	72.67	3.722	11.63	26.1	3.944	0.451	3.636	0.2543	119.4	0.2134	0.2928	0.4232	88.01	17.9	104.5	2.191
1070	24.01	41.93	74.11	3.736	11.84	26.72	4.043	0.4118	3.665	0.2307	105.7	0.1851	0.2898	0.4275	91.18	16.53	107.4	2.374
1071	23.15	42.37	74.25	3.706	11.89	27.07	4.07	0.4254	3.628	0.2327	118.9	0.165	0.3005	0.429	87.91	13.04	100.2	2.324
1072	23.76	42.49	73.78	3.631	11.81	26.2	3.944	0.4172	3.626	0.2311	110.4	0.1842	0.2895	0.4073	89.04	19.8	107.1	2.351
1073	23.8	42.28	73.69	3.667	11.78	25.87	3.904	0.4167	3.553	0.2328	118.1	0.1963	0.2875	0.4105	93.32	17.08	110.6	2.329
1076	24.63	43.15	73.11	3.58	11.69	26.27	3.972	0.4093	3.574	0.2342	111.3	0.2191	0.2854	0.427	87.86	16.73	103.4	2.28
1077	24.25	42.35	73.96	3.529	11.83	26.12	3.948	0.409	3.569	0.2238	110.5	0.201	0.2885	0.4101	92.3	21.61	112.5	2.37
1078	23.55	41.53	73.64	3.537	11.79	25.74	3.879	0.4706	3.518	0.234	122	0.1717	0.2861	0.3843	98.4	17.59	117.6	2.172
1081	24.11	42.5	72.64	3.57	11.62	25.89	3.892	0.4434	3.481	0.2528	124.4	0.2481	0.273	0.4173	89.24	16.53	104.8	2.127
1082	24.41	42.48	73.94	3.726	11.84	26.38	4.002	0.4267	3.568	0.2287	114.6	0.1681	0.2891	0.4039	92.06	17.58	109.3	2.275
1083	23.81	43.07	73.84	3.745	11.81	26.18	3.943	0.4257	3.635	0.2274	113.7	0.2176	0.2875	0.3944	91.78	17.69	109.1	2.343
1084	24.52	41.77	73.45	3.608	11.76	26.43	3.987	0.4485	3.571	0.2494	114.9	0.2171	0.2892	0.4342	89.57	16.13	105.2	2.155
1085	24.53	43.09	72.98	3.534	11.66	25.97	3.923	0.435	3.535	0.2403	112.9	0.2241	0.2856	0.405	88.96	18.64	106	2.219
1086	23.85	41.78	74.5	3.718	11.91	26.43	3.985	0.4204	3.636	0.2243	112.4	0.1842	0.2853	0.418	92.83	18.02	110.6	2.374
1089	23.94	42.44	73.67	3.74	11.79	26.27	3.96	0.4192	3.646	0.227	110.3	0.2025	0.2904	0.4125	90.72	17.05	107.3	2.381
1090	23.59	42.32	73.25	3.687	11.73	26.23	3.914	0.4384	3.548	0.2334	107.7	0.2001	0.2933	0.3913	85.56	15.48	99.6	2.259
1092	22.68	41.01	74.17	3.522	11.86	25.75	3.875	0.4071	3.52	0.224	107.8	0.1808	0.278	0.3849	93.18	18.08	111.2	2.318
1093	22.55	41.07	74.33	3.389	11.9	25.59	3.838	0.4249	3.58	0.2289	125.3	0.1713	0.282	0.4578	94.82	17.68	112.9	2.317
1095	22.24	41.08	74.59	3.542	11.94	26.03	3.896	0.403	3.563	0.2164	117.2	0.2304	0.2808	0.4162	95.36	17.43	113.1	2.389
1096	23.58	42.35	73.29	3.574	11.74	26.23	3.947	0.4314	3.545	0.2302	115.3	0.21	0.2904	0.4047	91.18	17.79	108.3	2.283
1097	23.37	42.12	73.82	3.687	11.8	26.33	3.939	0.421	3.541	0.225	114.9	0.1996	0.2873	0.3942	83.62	16.17	97.8	2.299
1098	23.16	41.61	73.07	3.471	11.69	25.39	3.803	0.4271	3.502	0.2265	120.5	0.226	0.2662	0.3826	91.17	18.7	109	2.257
1099	23.59	41.84	73.4	3.573	11.74	25.86	3.892	0.4175	3.466	0.2348	111.5	0.2164	0.2764	0.4	92.42	18.6	110.4	2.208
1100	23.26	41.09	73.56	3.524	11.78	25.39	3.794	0.3944	3.469	0.2344	114.1	0.2253	0.2733	0.408	94.41	16.39	111	2.286
1101	22.52	41.12	73.91	3.41	11.83	25.65	3.85	0.4314	3.535	0.2409	115.1	0.1913	0.277	0.3807	95.53	17.79	113.6	2.23
1102	22.88	41.32	74.14	3.704	11.87	25.76	3.854	0.4206	3.399	0.2284	107.8	0.2767	0.2829	0.391	93.84	17.88	111.6	2.233
1103	23.64	42.09	73.67	3.57	11.79	25.5	3.835	0.4162	3.553	0.2355	114.3	0.2232	0.274	0.4171	88.42	19.26	105.8	2.292
1105	23.02	41.95	73.83	3.53	11.81	25.82	3.869	0.4336	3.643	0.2353	115	0.1859	0.2762	0.4202	89.9	20.59	108.8	2.239
1108	23.02	41.31	74.36	3.592	11.9	26.43	3.973	0.4033	3.665	0.212	114	0.1703	0.2886	0.4234	90.1	17.19	106.3	2.488
1109	23.37	42.2	72.96	3.484	11.67	25.85	3.863	0.4537	3.554	0.2426	117.7	0.2237	0.2899	0.402	86.78	14.75	100.6	2.162
1110	23.49	42.34	73.44	3.532	11.76	25.73	3.866	0.42	3.57	0.2292	115	0.1826	0.2786	0.4047	90.3	19.25	108.4	2.29
1112	23.69	42.73	73.16	3.526	11.7	25.5	3.828	0.4328	3.399	0.2358	108.9	0.2162	0.2687	0.3888	88.48	18.74	105.8	2.13
1113	22.97	41.33	73.58	3.611	11.77	26.34	3.941	0.4083	3.53	0.2362	109.9	0.1919	0.2809	0.4077	88.15	17.68	104.7	2.291
1114	22.79	41.58	73.56	3.492	11.77	25.37	3.797	0.4361	3.544	0.2351	114.6	0.1902	0.2766	0.4076	90.35	18.56	108.1	2.198
1115	22.79	41.4	74.13	3.504	11.86	25.7	3.862	0.4196	3.533	0.2251	111.8	0.1955	0.2767	0.4146	94.66	19.37	114	2.295
1116	23.08	41.65	74.16	3.486	11.88	25.7	3.86	0.405	3.557	0.2248	112.9	0.1699	0.2802	0.3891	94.37	16.98	111.4	2.363
1119	23.1	41.16	73.97	3.526	11.83	26.08	3.925	0.4312	3.529	0.2282	119.9	0.1734	0.2836	0.4163	96.17	17.72	115	2.234
1121	23.79	42.31	73.18	3.486	11.7	25.5	3.839	0.4468	3.439	0.2504	124.7	0.2039	0.2731	0.4142	92.14	16.65	108.5	2.093
1123	23.02	41.47	73.69	3.524	11.79	25.81	3.88	0.4308	3.575	0.2316	120.4	0.1721	0.2861	0.4174	95.05	17.5	113.2	2.254
1124	23.2	41.45	72.75	3.519	11.64	25.43	3.815	0.456	3.404	0.255	115.8	0.2285	0.277	0.399	90.11	17.21	106.7	2.051
1125	22.75	41.13	74.32	3.571	11.89	25.77	3.865	0.4109	3.602	0.2215	120.3	0.1784	0.2823	0.3977	94.84	17.4	112.5	2.378
1126	23.45	42.28	73.8	3.57	11.8	26.34	3.954	0.4206	3.519	0.2403	110.8	0.1874	0.2878	0.3978	88.17	16.49	103.4	2.231
1128	24.08	43.3	73.19	3.721	11.71	26.13	3.932	0.3814	3.615	0.2287	112.1	0.2151	0.2824	0.4145	85.82	15.54	100	2.417
1129	23.03	41.8	73.71	3.52	11.8	25.53	3.82	0.4121	3.504	0.2253	109.2	0.2117	0.2757	0.3971	94.83	21.1	115.7	2.273
1130	23.97	42.57	73.09	3.581	11.69	25.8	3.875	0.4268	3.584	0.2335	118.6	0.2096	0.2819	0.3852	87.44	15.28	101.7	2.27
1131	23.68	41.75	73.58	3.647	11.77	26.01	3.883	0.4279	3.461	0.2517	113.7	0.2041	0.2845	0.4351	88.71	17.31	105	2.142
1132	24.1	43.02	72.04	3.565	11.51	25.39	3.81	0.4266	3.489	0.2352	117.4	0.1919	0.2765	0.3956	86.98	17.87	103	2.218
2001	24.14	42.59	72.77	3.583	11.63	25.67	3.866	0.4562	3.46	0.2264	124.7	0.1695	0.2752	0.4031	85.82	17.52	101.7	2.184
2002	23.43	42.22	73.42	3.511	11.75	25.99	3.901	0.4228	3.562	0.2436	124.9	0.1814	0.2823	0.4259	89.2	20.49	107.9	2.209
2003	23.48	42.02	72.84	3.458	11.66	25.56	3.852	0.4454	3.473	0.237	125.9	0.1864	0.2776	0.4106	90.92	19.79	109.6	2.164
2004	22.99	41.42	73.93	3.627	11.82	26.59	4.001	0.4065	3.532	0.2274	116.3	0.1708	0.2913	0.424	91.41	21.93	112.5	2.324
2005	22.72	41.82	73.76	3.591	11.81	25.82	3.876	0.4234	3.551	0.2275	111.2	0.1856	0.2755	0.4086	93.17	23.19	115.5	2.267
2006	23.06	41.75	73.55	3.521	11.76	25.56	3.854	0.4104	3.419	0.2243	115.5	0.1809	0.281	0.3843	94.25	25.64	118.7	2.228
2007	23.69	42.4	73.48	3.653	11.76	26.21	3.951	0.3965	3.608	0.2279	118.1	0.1731	0.2877	0.443	85.74	19.94	103.9	2.359
2008	23.32	42.27	73.23	3.588	11.72	25.66	3.872	0.444	3.6	0.2202	123.4	0.1756	0.2785	0.4517	93.46	20.2	113.4	2.319
2009	23.47	42.37	73.35	3.577	11.74	25.85	3.895	0.4188	3.509	0.2432	116.9	0.2224	0.2782	0.4242	89.34	18.78	107.2	2.2
2010	22.75	40.94	74.64	3.724	11.94	26.62	4.018	0.418	3.56	0.2471	122	0.1726	0.293	0.4152	93	16.8	109.8	2.214
2011	22.4	40.96	73.98	3.618	11.85	26.4	3.983	0.4435	3.636	0.2276	114.6	0.1793	0.2781	0.4357	94.35	19.37	113.6	2.299
2012	23	41.79	73.48	3.71	11.76	27.23	4.104	0.4337	3.678	0.228	107.8	0.1651	0.2935	0.4526	88.45	18.57	105.8	2.334
2013	23.74	42.76	72.8	3.604	11.65	25.82	3.89	0.41	3.496	0.2271	119	0.157	0.2778	0.4156	88.92	16.88	105.1	2.293
2014	23.53	42.3	73.44	3.697	11.75	26.09	3.925	0.4655	3.391	0.2497	115.7	0.2352	0.2815	0.4188	94.96	15.19	110.7	2.013
2015	22.98	41.51	74.47	3.605	11.91	26.23	3.937	0.4158	3.546	0.2447	111.7	0.2017	0.284	0.4212	95.69	18.11	114.3	2.228
2016	23.21	41.86	74.06	3.619	11.85	26.16	3.939	0.4073	3.593	0.2313	109.4	0.175	0.2828	0.4138	96.5	17.84	114.9	2.369
2017	23.53	41.87	73.7	3.52	11.79	26.11	3.918	0.4299	3.561	0.2343	117.5	0.2079	0.2859	0.4398	95.47	19.28	115	2.237
2018	22.39	40.75	74.33	3.637	11.89	26.39	3.966	0.3914	3.625	0.224	110.6	0.209	0.2814	0.4129	98.6	24.94	123.7	2.458
2019	22.93	41.42	73.56	3.602	11.77	26.01	3.902	0.442	3.481	0.2376	117.7	0.2199	0.2846	0.4208	93.42	15.04	108.8	2.209
2020	23.34	42.02	73.12	3.549	11.7	25.75	3.884	0.426	3.519	0.2423	117.9	0.187	0.2749	0.4033	92.2	18.38	110.3	2.217
2021	22.93	42	74.14	3.568	11.88	26.18	3.948	0.3895	3.661	0.2249	112.1	0.1623	0.2774	0.4002	93.72	17.96	111.8	2.459
2022	23.93	42.31	73.55	3.642	11.77	26.2	3.944	0.4455	3.468	0.2539	120.7	0.2312	0.2843	0.4268	89.47	17.08	105.6	2.085
2023	24.52	42.77	73.11	3.56	11.71	25.75	3.866	0.441	3.412	0.2452	119.2	0.2603	0.288	0.4346	88.21	16.49	103.9	2.097
2024	24.1	42.91	72.29	3.585	11.56	25.67	3.864	0.4392	3.443	0.2477	130.6	0.1899	0.2781	0.4379	92.11	17.82	109.9	2.13
2025	23.34	41.77	73.45	3.608	11.76	26.26	3.97	0.4172	3.574	0.2305	112	0.1832	0.2832	0.4338	90.72	14.91	105.5	2.36
2026	22.69	40.92	74.55	3.636	11.92	26.73	4.023	0.4497	3.527	0.226	113.7	0.1944	0.2995	0.4238	101.23	18.42	121.1	2.23
2027	22.91	41.28	74.47	3.701	11.93	26.96	4.055	0.4073	3.619	0.2228	115.9	0.1816	0.2823	0.4435	89.91	16.64	105.8	2.39
2028	23.71	42.39	73.28	3.539	11.72	25.52	3.821	0.4066	3.521	0.2346	114.2	0.2206	0.2747	0.4334	92.63	20.92	113	2.3
2029	23.23	41.77	73.43	3.663	11.74	26.29	3.952	0.4247	3.535	0.2439	114	0.2155	0.2798	0.4382	92.98	16.98	109.9	2.203
2030	23.58	42.05	73.58	3.621	11.78	26.05	3.919	0.4236	3.516	0.2424	112.6	0.1721	0.2862	0.4209	93.13	17.6	110.8	2.223
2031	23.63	41.84	74.28	3.684	11.87	26.76	4.026	0.4084	3.571	0.2227	113.6	0.1654	0.2937	0.4258	92.24	16.04	108.3	2.347
2032	23.26	41.69	73.76	3.674	11.81	25.96	3.906	0.4074	3.611	0.233	115.9	0.175	0.2798	0.4108	95.64	14.25	111	2.333
2033	24.18	42.17	72.64	3.548	11.61	25.74	3.868	0.4324	3.564	0.2434	124.1	0.1821	0.2764	0.4348	94.51	16.51	111.4	2.193
2034	23.63	42.25	73.15	3.563	11.71	25.93	3.904	0.4148	3.572	0.2407	113.4	0.2096	0.2824	0.4211	94.18	17.57	112.5	2.248
2035	23.14	41.81	73.6	3.541	11.77	25.67	3.865	0.4521	3.503	0.2322	116.2	0.2197	0.277	0.3957	98.57	22.41	121.4	2.174
2037	23.27	41.7	73.92	3.609	11.83	25.87	3.9	0.4215	3.565	0.2411	116.6	0.1975	0.2925	0.4192	98.14	17.65	116.9	2.261
2038	23.87	42.34	73.11	3.643	11.69	25.74	3.869	0.425	3.442	0.2428	117.9	0.2016	0.2774	0.4037	87.2	16.17	102.6	2.11
2039	23.44	41.6	73.87	3.58	11.82	25.81	3.894	0.4353	3.515	0.2244	116.5	0.1927	0.2816	0.4244	93.27	17.69	111.1	2.219
2040	23.91	42.94	72.84	3.564	11.66	25.08	3.775	0.423	3.523	0.2521	125.4	0.2176	0.273	0.4182	96.09	16.03	113	2.221
2043	22.7	41.17	74.17	3.584	11.87	26.1	3.908	0.3824	3.655	0.2161	109.6	0.1933	0.2886	0.4421	103.83	18.95	124.8	2.589
2044	22.86	41.33	74.1	3.552	11.84	26.45	3.974	0.4273	3.51	0.2209	117.7	0.1839	0.2893	0.4152	100.02	19.53	121	2.238
2045	23.38	41.49	74.01	3.644	11.84	25.81	3.871	0.3929	3.585	0.2301	116.1	0.2193	0.2903	0.4353	96.43	17.86	115.1	2.395
2046	22.88	40.77	74.18	3.493	11.87	26.33	3.948	0.4124	3.514	0.2184	112.3	0.1832	0.29	0.3943	98.07	17.75	117.4	2.329
2048	23.72	41.96	73.41	3.624	11.75	25.98	3.897	0.4312	3.418	0.2441	118.5	0.2595	0.2828	0.4235	98.65	18.25	118.1	2.107
2049	24.29	42.63	72.26	3.717	11.55	25.43	3.827	0.4639	3.436	0.2446	127.3	0.1936	0.2699	0.4012	93.08	16.53	109.6	2.12
2050	22.66	41.07	74.12	3.689	11.87	26.32	3.975	0.4116	3.594	0.2196	111.5	0.1755	0.2832	0.4372	102.6	25.59	129.2	2.404
2051	23.4	42.38	73.6	3.598	11.77	26	3.906	0.4228	3.56	0.2364	112.7	0.1717	0.2812	0.4147	94.09	16.09	110.6	2.25
2052	22.79	41.17	73.67	3.597	11.78	26.13	3.935	0.4133	3.543	0.2209	110.2	0.1999	0.291	0.4285	100.87	20.73	123.2	2.382
2053	23.8	42.27	73.31	3.588	11.72	26.01	3.908	0.4166	3.579	0.2331	118.7	0.192	0.2874	0.429	90.42	19.33	108.4	2.28
2054	22.27	40.67	74.53	3.551	11.93	26.21	3.94	0.4168	3.56	0.2315	110.8	0.1953	0.2898	0.4228	104.69	20.08	126.9	2.258
2055	22.92	41.13	74.6	3.553	11.94	26.35	3.961	0.4487	3.518	0.2293	107.8	0.2068	0.2904	0.3898	99.73	22.03	122.8	2.169
2056	22.29	40.89	74.18	3.617	11.87	26.18	3.924	0.409	3.58	0.2265	119.2	0.1782	0.2847	0.4221	100.34	21.93	123.3	2.372
2057	22.5	40.38	75.02	3.621	12.02	26.57	4.009	0.4118	3.632	0.2206	109.8	0.1572	0.294	0.4162	97.78	17.86	116.8	2.417
2058	22.73	41.15	73.79	3.68	11.81	26.76	4.04	0.4007	3.673	0.2234	114	0.181	0.2916	0.4246	90.02	17.64	107.1	2.461
2059	23.75	42.77	73.35	3.601	11.74	25.75	3.868	0.414	3.56	0.2404	115.1	0.1707	0.2834	0.4131	89.12	18.77	106.8	2.246
2060	23.61	42.64	73.74	3.516	11.81	26.2	3.936	0.434	3.453	0.2309	107.6	0.1838	0.2829	0.3848	93.63	21.57	114.6	2.155
2061	23.48	42	73.88	3.588	11.81	26.25	3.945	0.4276	3.58	0.2305	117.5	0.173	0.2825	0.4297	89.92	17.66	106.4	2.265
2062	23.28	41.87	73.68	3.51	11.78	25.7	3.878	0.4091	3.626	0.2376	115.2	0.2088	0.287	0.4469	98.05	17.49	116.6	2.381
2063	23.88	42.03	73.05	3.53	11.68	25.58	3.831	0.4258	3.503	0.2415	117.8	0.2157	0.2863	0.4164	91.41	18.77	109.8	2.204
2064	23.09	41.91	74.26	3.581	11.89	25.96	3.908	0.4206	3.546	0.2188	113.6	0.1903	0.2831	0.427	98.92	20.58	120.3	2.31
2065	22.65	41.09	74.38	3.612	11.9	26.22	3.95	0.4466	3.675	0.2449	116.3	0.1512	0.2893	0.4158	100.68	19.83	121.6	2.241
2066	22.57	40.79	74.51	3.634	11.92	25.98	3.919	0.4357	3.512	0.2322	106.2	0.2436	0.2863	0.4072	101.24	23.17	125.4	2.231
2067	23.29	41.35	73.93	3.685	11.84	26.04	3.922	0.438	3.595	0.2311	118.4	0.2027	0.2918	0.4069	95.29	17.65	113.5	2.322
2068	23.95	42.31	72.77	3.566	11.65	25.48	3.85	0.4491	3.404	0.2406	121.9	0.2255	0.285	0.424	94.32	16.51	111.2	2.084
2069	23.36	41.7	74.02	3.57	11.85	25.98	3.91	0.4313	3.508	0.2191	113.4	0.1729	0.284	0.3966	96.88	21.29	118.5	2.261
2070	22.13	40.72	74.73	3.539	11.95	26.72	4.032	0.4042	3.551	0.2195	115.1	0.1712	0.2871	0.4149	99.47	20.26	120.7	2.358
2071	23.75	42.42	73.53	3.503	11.78	25.96	3.91	0.4604	3.455	0.2536	113.2	0.2238	0.2835	0.4193	91.52	18.19	109.3	2.084
2072	23.56	41.27	73.96	3.586	11.84	26.27	3.953	0.4666	3.576	0.2522	119.2	0.1705	0.29	0.4349	91.96	18.78	110.4	2.168
2073	23.63	42.01	73.18	3.529	11.72	25.67	3.863	0.4245	3.481	0.2433	118.2	0.223	0.2767	0.4319	93.43	21.34	114.4	2.18
2074	22.37	40.64	74.47	3.537	11.92	26.4	3.974	0.4243	3.598	0.2221	110.5	0.1624	0.2891	0.4153	101.43	24.03	126.3	2.383
2075	22.74	41.09	74	3.582	11.83	26.81	4.045	0.4234	3.626	0.2322	123.4	0.1856	0.2947	0.4318	94.38	15.79	110.7	2.323
2077	22.68	40.94	74.39	3.508	11.91	25.98	3.892	0.3993	3.551	0.22	114.8	0.1881	0.2816	0.4101	100.12	23.1	123.9	2.386
2079	23.91	42.29	73.63	3.564	11.79	26.21	3.938	0.442	3.651	0.233	121.6	0.1781	0.2903	0.4566	86.99	15.49	101.2	2.339
2080	23.14	41.22	73.7	3.524	11.79	26.19	3.933	0.4057	3.707	0.2294	121.7	0.1959	0.2873	0.4466	96.94	20.39	117.7	2.482
2081	23.41	41.87	74.24	3.5	11.87	25.92	3.902	0.4451	3.565	0.2388	117.2	0.1851	0.2833	0.4119	94.31	19.16	113.4	2.166
2082	23.56	41.8	74.12	3.56	11.87	26	3.903	0.4423	3.506	0.2334	117.7	0.1846	0.2885	0.4001	95.37	18.87	114.7	2.215
2083	23.1	41.19	73.87	3.609	11.81	26.16	3.933	0.428	3.477	0.2315	117.5	0.1956	0.2891	0.4147	95.1	16.47	112.3	2.212
2084	23.34	41.61	74.05	3.472	11.86	25.79	3.879	0.4087	3.606	0.2313	125.5	0.1693	0.2841	0.405	90.68	19.42	109.5	2.34
2085	22.95	40.93	74.11	3.54	11.85	26.31	3.938	0.4074	3.64	0.2298	122.7	0.1954	0.2893	0.4461	96.77	19.09	116.3	2.399
2086	22.79	41.09	74.29	3.593	11.88	26.53	3.992	0.4227	3.575	0.2235	112.1	0.177	0.2897	0.4162	92.85	18.62	111.1	2.344
2087	23.8	41.82	73.88	3.546	11.84	26.12	3.925	0.4373	3.509	0.2214	119.6	0.2051	0.2847	0.4174	92.14	18.23	110.1	2.268
2088	23.68	42.07	73.34	3.433	11.73	26.06	3.925	0.4357	3.55	0.243	119.6	0.1908	0.2868	0.4247	83.6	20.6	101.9	2.196
2089	23.65	41.55	73.95	3.576	11.82	26.15	3.934	0.4162	3.432	0.2231	108.1	0.2692	0.2764	0.405	88.85	20.26	107.9	2.225
2090	23.99	42.45	73.48	3.52	11.76	25.42	3.813	0.481	3.369	0.2513	114.6	0.2822	0.2719	0.4218	80.29	23.22	100	1.966
2092	22.88	41.07	73.92	3.577	11.83	26.22	3.923	0.4141	3.614	0.2243	110.6	0.1884	0.2871	0.424	90.2	27.85	115.5	2.378
2093	23.68	42.46	73.22	3.587	11.7	25.44	3.804	0.4773	3.371	0.2481	118.8	0.2735	0.2781	0.3995	94.3	22.09	116.1	1.989
2095	23.57	41.87	73.14	3.532	11.7	26.13	3.934	0.4507	3.617	0.2352	122	0.1757	0.2884	0.4314	89.75	18.11	106.8	2.266
2096	22.83	41.1	74.13	3.639	11.87	26.19	3.93	0.4478	3.662	0.2307	113.2	0.1941	0.2883	0.4358	91.71	16.76	108.1	2.297
2097	23.9	42.21	73.74	3.529	11.79	25.7	3.863	0.442	3.456	0.2331	111.1	0.2312	0.2829	0.3891	93.55	21.76	114.8	2.159
2098	23.59	41.99	74.04	3.576	11.85	25.76	3.865	0.4554	3.586	0.2265	114.8	0.188	0.2862	0.3803	96.72	20.68	117.8	2.236
2099	23.28	41.68	73.66	3.584	11.79	26.05	3.909	0.4197	3.63	0.2307	115.7	0.1855	0.2831	0.4497	93.92	17.54	112	2.36
2100	23.71	42.15	73.28	3.585	11.73	25.98	3.895	0.4508	3.469	0.2523	117.5	0.2143	0.2876	0.4138	96.96	19.02	116.5	2.09
2101	23.51	42.23	73.08	3.496	11.69	25.99	3.911	0.4411	3.567	0.2361	122.1	0.1999	0.2809	0.4356	95.92	19.18	115.5	2.219
2102	24.02	42.8	73.77	3.503	11.79	25.81	3.885	0.4362	3.616	0.2503	120.6	0.2023	0.2832	0.466	87.79	16.74	103.6	2.206
2103	23.39	41.85	73.91	3.638	11.83	26.69	4.017	0.4491	3.751	0.2384	115.7	0.1819	0.2934	0.4357	87.67	21.66	107.7	2.281
2104	24.12	42.26	73.4	3.667	11.73	26.88	4.047	0.4627	3.639	0.2558	118.1	0.1858	0.2931	0.4277	83.15	13.7	95	2.177
2105	23.35	41.74	74.22	3.638	11.88	26.48	3.977	0.419	3.678	0.2365	107.4	0.1685	0.2918	0.4393	91.62	16.56	108	2.338
2108	24.48	42.73	72.93	3.485	11.65	25.56	3.854	0.4319	3.546	0.2454	122.5	0.1763	0.2846	0.4033	88.11	18.06	104.9	2.22
2109	23.34	41.4	73.64	3.579	11.78	26.52	3.972	0.4052	3.602	0.2337	116.7	0.1852	0.2866	0.4352	95.44	20.62	116	2.398
2110	22.81	40.96	75	3.449	12.01	26.3	3.948	0.4602	3.525	0.2316	116.7	0.1992	0.2867	0.3887	93.85	23.1	116.3	2.172
2111	22.89	41.15	74.51	3.528	11.91	25.79	3.884	0.418	3.558	0.226	109.8	0.209	0.2897	0.3965	99.84	28.41	128	2.294
2112	23.95	42.28	73.33	3.59	11.74	25.76	3.864	0.4423	3.621	0.2426	120.5	0.2233	0.2823	0.4339	89.43	22.05	109.3	2.226
2113	23.66	42.31	73.47	3.599	11.75	25.38	3.812	0.4116	3.607	0.2386	110.7	0.2593	0.2763	0.3975	89.41	23.04	111.1	2.316
2114	23.53	41.83	73.73	3.525	11.81	25.83	3.885	0.4264	3.562	0.2358	114.8	0.2276	0.2738	0.4045	91.6	21.3	112	2.261
2115	23.2	40.95	74.49	3.555	11.93	25.94	3.887	0.4368	3.528	0.2299	115.7	0.1902	0.289	0.4033	101.87	19.28	122.8	2.243
2116	23.48	42.21	73.69	3.584	11.79	26.02	3.914	0.4305	3.495	0.2393	116.1	0.2343	0.2864	0.415	92.93	18.82	111.6	2.206
2117	23.66	41.63	72.87	3.441	11.67	25.65	3.863	0.4636	3.466	0.2437	121.9	0.203	0.2862	0.4254	89.54	17.87	106.8	2.117
2119	23.99	42.54	73	3.54	11.67	26.32	3.95	0.4355	3.65	0.2396	116.1	0.2012	0.2914	0.4423	86.65	14.86	100.7	2.297
2120	23.96	42.09	73.79	3.51	11.82	25.95	3.911	0.4322	3.548	0.2324	116.9	0.1949	0.2843	0.4312	90.16	17.69	107.1	2.224
3001	23.47	42.14	73.28	3.484	11.73	25.81	3.885	0.4454	3.528	0.2487	119	0.17	0.2714	0.4176	92.94	17.51	110.4	2.126
3002	23.74	42.18	73.47	3.56	11.73	25.92	3.892	0.4195	3.584	0.241	111.2	0.1973	0.2895	0.4296	97.56	16.38	115.1	2.295
3003	24.11	42.83	72.64	3.581	11.62	25.5	3.833	0.432	3.533	0.2497	114.3	0.1955	0.2694	0.406	90.25	17.59	107.3	2.162
3011	23.49	41.31	73.99	3.587	11.84	25.71	3.869	0.445	3.657	0.2478	122.6	0.1796	0.2912	0.4774	98.96	21.78	121.4	2.205
3012	23.15	41.59	73.98	3.636	11.85	26.12	3.924	0.4161	3.64	0.238	108.4	0.2269	0.2924	0.415	97.23	17.03	115.2	2.342
3021	23.79	42.32	73.26	3.564	11.73	25.18	3.791	0.4169	3.532	0.2265	109.8	0.2197	0.2666	0.4119	101.5	18.63	121.6	2.319
3022	24.8	44.03	72.08	3.534	11.54	25.23	3.791	0.4159	3.441	0.2409	111.6	0.2485	0.2776	0.4069	93.92	16.17	110.5	2.192
3031	23.2	41.56	73.52	3.622	11.76	26.25	3.955	0.4118	3.511	0.2364	113	0.2024	0.2842	0.4081	101.91	19.67	123.2	2.295
3032	23.9	42.9	73.08	3.628	11.69	25.97	3.898	0.4425	3.577	0.2409	113.3	0.1834	0.282	0.4391	92.27	20.28	111.9	2.23
3033	23.69	42.28	72.93	3.662	11.67	25.6	3.85	0.4217	3.57	0.2424	113.5	0.2087	0.2835	0.4453	95.86	19.17	115.7	2.271
3041	23.26	41.76	73.99	3.606	11.84	26.48	3.984	0.4307	3.567	0.2337	115.5	0.1905	0.2929	0.4189	94.59	16.89	111.9	2.277
3042	23.88	42.57	73.79	3.678	11.8	25.79	3.881	0.4145	3.573	0.2336	108.1	0.2303	0.2774	0.3883	92.92	18.61	111.3	2.356
3051	23.12	41.55	73.77	3.705	11.8	26.13	3.92	0.4446	3.531	0.2302	110.8	0.2071	0.2839	0.4071	95.52	18.65	114.7	2.212
3052	22.8	41.37	74.06	3.647	11.86	26.53	3.982	0.4351	3.627	0.2502	117.4	0.1983	0.288	0.4457	99.09	19.1	119.5	2.181
3053	22.51	41.13	74.3	3.628	11.88	26.21	3.94	0.4342	3.63	0.2301	110.8	0.2141	0.282	0.4265	100.95	21.67	123.6	2.322
3061	24.61	42.84	71.86	3.567	11.5	24.64	3.689	0.4565	3.439	0.2578	132.5	0.2275	0.2753	0.3804	90.12	28.43	116.8	2.042
3062	22.91	41.44	74.07	3.641	11.87	26.6	3.982	0.4003	3.665	0.2223	116.4	0.1788	0.2959	0.424	96.59	18.3	115.7	2.514
3071	23.01	41.44	73.94	3.61	11.84	26.05	3.908	0.4689	3.651	0.2479	121.4	0.2067	0.283	0.4555	89.85	18.6	107.7	2.16
3072	23.45	42.27	73.6	3.679	11.77	26.58	4	0.4056	3.761	0.2214	111.7	0.1739	0.2911	0.4252	88.31	13.82	101.6	2.535
3073	23.78	42.06	73.36	3.745	11.75	26.17	3.946	0.4195	3.614	0.2238	115.1	0.169	0.2843	0.4097	95.56	16.09	112.6	2.372
3081	23.5	41.83	73.7	3.626	11.79	26.01	3.916	0.4291	3.521	0.2335	114.7	0.1964	0.2861	0.4108	94.12	20.35	114.2	2.235
3082	23.18	41.59	74.08	3.591	11.85	25.8	3.894	0.4226	3.518	0.2369	118.9	0.1956	0.2819	0.4134	97.36	21.86	119.7	2.221
3091	22.2	40.4	74.76	3.538	11.96	26.28	3.933	0.413	3.573	0.2125	110.1	0.1708	0.2785	0.4009	101.77	23.91	126.8	2.428
3092	22.76	40.88	74.39	3.674	11.9	26.58	4.003	0.3942	3.648	0.2233	111.2	0.17	0.2992	0.4268	93.43	18.43	111.8	2.51
3093	23.8	42.51	73.27	3.578	11.72	25.55	3.833	0.4449	3.534	0.2391	118.5	0.1684	0.2855	0.4064	97.09	21.28	118.8	2.213
3101	22.71	40.84	74.35	3.536	11.91	26.56	3.989	0.4403	3.594	0.2379	123	0.1825	0.2878	0.429	91.87	18.38	110.1	2.228
3102	23.22	41.45	73.74	3.664	11.81	25.77	3.876	0.4184	3.628	0.2229	118.1	0.1747	0.2874	0.4572	99.63	20.34	121	2.405
3111	22.87	40.94	73.97	3.596	11.85	26.2	3.944	0.4253	3.563	0.224	118.4	0.1958	0.2896	0.4167	96.27	18.53	115.5	2.34
3112	24	42.36	72.89	3.573	11.67	25.78	3.875	0.4329	3.52	0.2512	116.9	0.2056	0.2868	0.4096	94.1	19.81	113.9	2.154
3113	23.03	41.53	74.15	3.532	11.85	26.1	3.921	0.4165	3.656	0.2296	122.5	0.1922	0.2876	0.4283	97.41	20.58	118.5	2.392
3121	23.92	42.21	73.19	3.479	11.71	25.74	3.871	0.4562	3.496	0.2392	123.7	0.1737	0.2796	0.4193	91.13	20.45	110.8	2.099
3131	24.08	43.22	72.36	3.539	11.57	25.44	3.826	0.4455	3.433	0.2572	115.7	0.2573	0.2639	0.4287	86.1	16.93	101.6	2.02
3132	22.74	41.41	74.22	3.668	11.87	26.59	3.993	0.4076	3.596	0.2353	112.5	0.1747	0.2962	0.4035	86.6	17.48	102.7	2.357
3133	23.28	42.01	73.87	3.505	11.83	25.54	3.831	0.4642	3.511	0.2314	119.1	0.2219	0.273	0.3944	90.16	21.85	110.5	2.182
3141	23.74	42.3	73.23	3.577	11.71	25.93	3.923	0.4324	3.647	0.2512	118.2	0.2465	0.2909	0.4255	88.65	18.73	106.5	2.216
3142	23.01	41.77	73.53	3.643	11.77	26.19	3.931	0.4164	3.619	0.2307	116.3	0.1842	0.2895	0.4383	91.13	17.1	108	2.372
3151	22.46	40.76	74.63	3.438	11.95	26.15	3.956	0.4281	3.559	0.2404	118.7	0.173	0.288	0.4397	99.1	22.33	122.3	2.245
3152	23.12	41.72	74.25	3.682	11.89	26.13	3.949	0.4214	3.623	0.233	118.1	0.1969	0.2921	0.4046	90.86	22.15	112	2.355
3153	23.64	41.83	74.53	3.509	11.92	26.18	3.967	0.4573	3.619	0.2471	119.2	0.1822	0.2893	0.4267	90.37	20.46	109.9	2.156
3161	22.92	41.46	74.21	3.65	11.88	26.1	3.939	0.4294	3.611	0.229	120.8	0.2032	0.2785	0.4212	94.34	17.02	111.6	2.308
3162	23.62	41.94	74.15	3.548	11.85	26	3.922	0.4396	3.586	0.2404	116.5	0.1927	0.285	0.4377	97.28	18.86	117	2.215
3171	24.2	43.36	72.19	3.591	11.56	25.33	3.794	0.422	3.644	0.2324	116.6	0.2301	0.2797	0.4129	87.36	15.92	102.3	2.384
3172	23.52	42.24	73.44	3.545	11.76	25.91	3.888	0.4412	3.639	0.2413	119.3	0.1931	0.2891	0.4014	93.17	16.5	109.9	2.286
3181	23.71	42.62	73.6	3.491	11.77	25.62	3.875	0.4143	3.51	0.2316	117	0.2263	0.2713	0.4105	92.95	21.85	114.2	2.278
3191	22.81	41	74.17	3.672	11.87	26.87	4.057	0.425	3.588	0.2324	118.5	0.1574	0.2898	0.4401	101.05	19.37	121.9	2.279
3192	22.96	41.47	74.49	3.568	11.92	26.2	3.946	0.4093	3.653	0.23	114.1	0.1584	0.2863	0.3996	95.2	16.78	112.5	2.456
3193	22.76	41.36	74.19	3.63	11.86	26.22	3.942	0.4214	3.682	0.2214	120.6	0.1467	0.2821	0.4188	98.54	15.58	115.5	2.452
3201	23.49	42.19	73.93	3.606	11.84	25.96	3.904	0.4336	3.46	0.2409	120.5	0.1664	0.2957	0.4047	99.54	21.74	122.3	2.137
3202	23.2	41.56	74.17	3.568	11.88	26.27	3.973	0.4287	3.517	0.2257	115.7	0.1635	0.2865	0.4412	92.94	19.29	112	2.279
3221	22.93	41.04	74.18	3.614	11.88	26.22	3.94	0.4438	3.52	0.2307	115.3	0.2109	0.282	0.4043	97.67	18.58	117.2	2.201
3222	23.25	41.56	73.75	3.55	11.8	26.16	3.938	0.4263	3.62	0.237	121.2	0.1805	0.2886	0.4138	95.13	16.45	112.3	2.292
3231	22.85	41.51	73.97	3.551	11.82	26.4	3.977	0.4428	3.502	0.2337	124.3	0.1892	0.2871	0.4168	98.94	22.68	122.4	2.18
3233	24.27	42.36	72.28	3.644	11.56	25.4	3.813	0.4479	3.55	0.237	122.5	0.1832	0.2833	0.3943	89.28	17.17	105.8	2.212
3241	22.86	41.42	74.32	3.551	11.89	25.93	3.907	0.4099	3.483	0.2249	114.6	0.2087	0.285	0.3951	97.37	17.15	115.4	2.343
3242	23.18	41.77	74.07	3.565	11.86	26.08	3.941	0.4263	3.48	0.2257	113	0.1789	0.2852	0.3944	94.08	22.3	116	2.225
3252	23.42	42.04	73.3	3.629	11.72	25.83	3.874	0.4392	3.583	0.23	115.2	0.1863	0.2819	0.3971	94.06	23.51	117	2.268
3253	23.53	42	73.87	3.636	11.81	26	3.913	0.4161	3.633	0.2243	114.3	0.2029	0.2912	0.4111	94.15	18.51	113	2.399
3261	23.4	41.73	73.92	3.538	11.82	26.23	3.954	0.418	3.656	0.225	119.3	0.1667	0.2868	0.4095	94.62	19.56	114.2	2.392
3262	22.67	40.73	73.82	3.564	11.8	26.34	3.949	0.4278	3.588	0.2265	118.2	0.1725	0.2859	0.4054	95.24	20.49	116	2.335
3271	23.41	41.7	74.05	3.771	11.85	25.95	3.9	0.4131	3.491	0.2226	112.2	0.2149	0.2845	0.401	97.42	18.04	116.4	2.329
3272	23.02	40.98	73.39	3.568	11.73	25.79	3.86	0.409	3.602	0.2275	108.1	0.2027	0.2804	0.4194	100.67	18.69	120.9	2.372
3281	23.47	41.92	73.96	3.628	11.85	26.28	3.955	0.4388	3.541	0.2289	114	0.1871	0.2883	0.3879	94.84	16.07	111.7	2.231
3282	23.13	41.44	73.63	3.724	11.76	26.33	3.955	0.4057	3.491	0.2284	109.3	0.1936	0.2931	0.4153	101.96	17.66	121.6	2.32
3291	24.8	43.26	72.05	3.579	11.52	25.37	3.823	0.4385	3.506	0.2449	112	0.2314	0.2822	0.4181	86.54	18.45	103.2	2.149
3292	23.17	41.54	74.05	3.626	11.85	26.49	3.992	0.4489	3.601	0.2322	117.8	0.1812	0.2926	0.4018	91.63	20.98	111.9	2.215
3301	23.34	41.79	73.48	3.713	11.76	26.18	3.952	0.4272	3.546	0.2376	123	0.1828	0.2909	0.4375	87.66	15.56	102.4	2.268
3302	22.45	40.99	74.24	3.61	11.89	26.32	3.958	0.4252	3.547	0.2261	119.8	0.1734	0.2921	0.3985	96.9	23.14	120.2	2.299
3311	24.08	42.35	73.11	3.612	11.69	25.56	3.852	0.4303	3.506	0.2252	114.9	0.2638	0.2752	0.4001	88.25	17.22	104.9	2.248
3312	23.1	41.18	73.81	3.628	11.8	26.19	3.951	0.4371	3.531	0.2333	106.5	0.2405	0.2901	0.4402	95.78	19.37	115.6	2.216
3313	23.29	41.53	73.23	3.688	11.72	26.1	3.92	0.4512	3.617	0.2333	117.1	0.2037	0.2862	0.4486	94.72	16.69	112.2	2.237
3321	23.93	41.98	73.26	3.572	11.72	26.04	3.921	0.4385	3.49	0.2451	115.9	0.2021	0.2863	0.4329	90.3	15.63	105.8	2.123
3322	22.68	41.33	74.03	3.609	11.86	25.97	3.898	0.4354	3.596	0.2227	119.6	0.1633	0.285	0.4063	99.93	22.31	123.5	2.295
3331	23.4	41.86	73.39	3.587	11.74	26.32	3.95	0.449	3.529	0.244	122	0.2007	0.2915	0.4177	93.06	18.12	111	2.161
3332	22.86	41.02	74.59	3.612	11.94	26.58	4.004	0.4353	3.549	0.2219	116.8	0.1815	0.2902	0.4082	97.41	17.04	115.8	2.271
3333	22.5	40.76	74.32	3.589	11.9	26.37	3.976	0.4074	3.528	0.213	111.8	0.1578	0.2858	0.4109	99.95	21.74	122.6	2.415
3341	23.98	42.22	73.81	3.611	11.81	25.7	3.867	0.4096	3.437	0.2409	111.3	0.2166	0.2904	0.4119	90.94	18.28	108.8	2.208
3342	23.98	41.84	73.58	3.527	11.76	26.74	4.024	0.442	3.453	0.2345	124	0.2032	0.2815	0.4347	88.18	15.88	103.5	2.159
3351	23.42	41.89	73.86	3.588	11.82	26.05	3.915	0.4227	3.631	0.2266	118.1	0.2151	0.2912	0.4233	95.05	16.47	112.2	2.383
3352	24.28	42.51	73.14	3.641	11.7	25.78	3.883	0.4211	3.588	0.2417	111.8	0.1874	0.2874	0.4156	92.35	16.43	108.8	2.283
3361	24.2	42.91	72.87	3.485	11.66	25.34	3.799	0.4188	3.684	0.2465	115.4	0.1946	0.2738	0.4315	88.92	21.9	109.4	2.319
3371	23.36	41.73	73.88	3.425	11.83	25.84	3.884	0.4253	3.583	0.2329	120.2	0.179	0.2865	0.4244	85.65	20.14	104.1	2.282
3372	23.85	41.57	73.72	3.5	11.79	25.42	3.813	0.4436	3.564	0.2383	115	0.1928	0.2852	0.4148	89.05	25.16	112.4	2.193
3381	24.33	42.7	73.29	3.494	11.73	25.52	3.837	0.4352	3.603	0.2361	118	0.185	0.2832	0.3953	80.54	18.44	96.5	2.238
3382	23.56	41.54	73.53	3.433	11.77	25.9	3.894	0.4363	3.487	0.2252	116	0.1786	0.2782	0.4449	86.94	23.68	108.5	2.257
3392	23.25	41.6	74.05	3.625	11.84	26.15	3.92	0.4151	3.564	0.2256	116.2	0.169	0.2829	0.3852	95.24	20.19	115.6	2.341
3393	23.61	41.98	74.12	3.578	11.86	26.19	3.935	0.4353	3.551	0.2277	114.5	0.1707	0.2818	0.386	89.67	14.98	104.4	2.25
3401	23.7	42.05	73.7	3.569	11.81	26.1	3.928	0.4321	3.695	0.2274	123.2	0.1839	0.2879	0.4509	87.24	16.09	102.5	2.351
3402	22.8	41.73	73.9	3.492	11.82	25.95	3.905	0.4246	3.557	0.2267	112.7	0.1949	0.289	0.4104	91.6	21.81	112.9	2.313
3411	23.05	41.24	74.01	3.531	11.85	26.46	3.982	0.3813	3.662	0.2091	109.9	0.2053	0.2872	0.4072	92.73	17.09	109.9	2.672
3412	24.16	42.39	73.1	3.483	11.7	26	3.912	0.4325	3.549	0.2395	122.2	0.1956	0.2812	0.4242	87.39	15.85	102.1	2.235
3413	23.75	41.86	73.69	3.434	11.79	25.13	3.785	0.4103	3.532	0.2376	117.6	0.1916	0.2765	0.4202	92.47	20.95	112.9	2.305
3421	23.25	41.48	73.77	3.545	11.81	26.13	3.934	0.4347	3.726	0.2397	116.6	0.1657	0.2904	0.4525	95.48	15.31	111.8	2.353
3422	24.15	42.8	73.2	3.518	11.7	25.94	3.896	0.4448	3.684	0.2319	121.2	0.1662	0.2728	0.4086	84.96	16.17	99.5	2.317
3431	23.05	42	73.74	3.589	11.8	26.46	3.963	0.4296	3.627	0.2178	122.9	0.1721	0.2863	0.4263	95.03	13.34	109.4	2.416
3432	24.2	43.01	73.11	3.517	11.7	25.58	3.849	0.4147	3.643	0.2309	118.8	0.2156	0.2852	0.4675	84.76	16.47	99.7	2.377
3433	23.11	41.49	74.05	3.552	11.86	26.3	3.954	0.4375	3.608	0.2216	114.9	0.1854	0.2907	0.3869	92.02	17.19	109.1	2.338
3441	23.73	41.97	73.64	3.555	11.77	25.88	3.889	0.4277	3.606	0.238	111.8	0.2127	0.293	0.4415	94.02	19.18	113.4	2.281
3442	24.58	42.97	73.09	3.456	11.68	24.98	3.748	0.418	3.45	0.2419	111.9	0.242	0.2693	0.4263	86.32	20.82	105.4	2.181
3452	25	43.5	72.41	3.579	11.58	25.45	3.824	0.3982	3.562	0.2358	111.7	0.2102	0.2743	0.3984	86.62	14.27	100.1	2.337
3461	24.91	43.72	72.43	3.479	11.59	25.2	3.787	0.433	3.377	0.2406	111.4	0.2712	0.2694	0.4016	85.75	14.31	99	2.084
3462	24.62	43.15	72.41	3.592	11.59	25.45	3.824	0.4023	3.567	0.2302	112	0.1898	0.2802	0.4152	91.91	17.06	108.9	2.358
3471	23.41	41.8	73.63	3.389	11.77	25.9	3.88	0.4185	3.576	0.2294	115.8	0.2075	0.2772	0.4108	91.92	20.68	112.1	2.332
3472	24.53	43.51	72.82	3.431	11.64	25.47	3.821	0.4513	3.496	0.2468	123.5	0.2349	0.2669	0.4226	89.07	19.37	107.2	2.106
3473	23.85	42.31	73.35	3.562	11.73	25.84	3.873	0.4315	3.668	0.2325	117.9	0.1613	0.2896	0.4229	92.52	13.98	107.1	2.337
3481	23.58	41.54	73.75	3.487	11.79	25.97	3.914	0.4441	3.547	0.2419	118	0.2015	0.291	0.461	95.33	17.28	113.1	2.169
3482	23.87	41.7	73.41	3.551	11.75	25.9	3.91	0.4761	3.519	0.2605	120.6	0.2087	0.2868	0.4738	93.08	16.43	109.8	2.004
3492	23.33	41.44	73.94	3.558	11.83	26	3.922	0.4388	3.592	0.2251	118.2	0.1756	0.2781	0.4126	93.91	19.41	113.3	2.295
3493	24.17	42.52	72.98	3.514	11.67	25.59	3.842	0.4469	3.564	0.2412	117.8	0.2094	0.2814	0.406	88.15	19.76	106.7	2.189
4002	23.54	42.21	73.31	3.486	11.73	25.95	3.907	0.4368	3.556	0.2389	120.6	0.1971	0.2898	0.446	93.86	24.66	117.3	2.227
4003	23.82	42.42	73.12	3.529	11.71	25.52	3.829	0.43	3.556	0.2355	117.2	0.1943	0.2829	0.4253	94.7	17.42	112.9	2.252
4004	23.82	42.61	72.87	3.433	11.66	25.85	3.896	0.4448	3.487	0.2554	119.8	0.2146	0.2829	0.4365	90.14	17.26	106.7	2.11
4006	23.56	41.81	73.67	3.454	11.78	25.97	3.902	0.4413	3.501	0.2685	120.4	0.242	0.2788	0.4351	94.6	16.66	112.1	2.083
4007	23.61	41.95	73.91	3.524	11.83	26.17	3.928	0.4237	3.55	0.2362	113.8	0.2019	0.2872	0.4249	94.57	17.84	113.3	2.275
4008	23.25	41.77	73.67	3.589	11.79	26.01	3.907	0.4213	3.577	0.2352	114.8	0.1834	0.2872	0.4119	96.44	17.65	115.4	2.303
4009	23.45	41.98	73.89	3.52	11.82	26.14	3.946	0.4169	3.597	0.2322	115.8	0.1982	0.2898	0.4215	93.83	17.91	112.2	2.337
4011	23.74	42.12	74.08	3.587	11.86	26.18	3.948	0.4348	3.614	0.2329	111.7	0.2014	0.2845	0.4244	91.3	15.68	107.2	2.297
4012	23.58	41.98	73.53	3.511	11.76	25.57	3.83	0.4288	3.557	0.2409	119	0.191	0.2878	0.4488	94.14	17.55	112.2	2.228
4013	23.25	41.98	73.83	3.538	11.82	25.97	3.913	0.4316	3.606	0.2355	118.1	0.1763	0.2832	0.417	92.34	18.81	111	2.295
4014	23.18	41.28	74.31	3.529	11.88	26.56	3.98	0.4255	3.556	0.235	119.2	0.191	0.2943	0.4298	102.19	17.39	122	2.26
4015	23.29	41.76	73.86	3.499	11.83	26.08	3.918	0.4276	3.562	0.2418	120.3	0.1922	0.2856	0.4276	91.79	17.78	109.5	2.229
4016	23.49	41.96	73.45	3.538	11.75	25.71	3.871	0.4178	3.559	0.2391	113.6	0.2112	0.2782	0.4147	91.78	19.13	110.6	2.288
4017	23.42	42.09	73.68	3.454	11.81	25.9	3.905	0.4475	3.549	0.237	114.2	0.1896	0.2763	0.4352	94.81	17.31	113.1	2.197
4018	22.77	41.26	74.2	3.558	11.87	26.21	3.933	0.4355	3.533	0.2355	112.5	0.1982	0.2928	0.4075	96.83	19.64	117.4	2.228
4019	23.11	41.99	73.61	3.561	11.78	25.97	3.897	0.4138	3.538	0.2387	115.2	0.2153	0.2856	0.4075	94.63	17.28	112.9	2.275
4021	23.33	41.42	74.49	3.555	11.92	26.09	3.926	0.4297	3.626	0.2327	116.3	0.1742	0.2826	0.4347	98.48	17.15	117.1	2.31
4023	23.29	41.55	73.91	3.498	11.82	26.01	3.913	0.4195	3.608	0.2357	121.8	0.1815	0.2901	0.4329	95.52	16.98	113.7	2.321
4025	23.33	42.19	73.53	3.436	11.77	25.87	3.885	0.426	3.534	0.2423	117.2	0.1891	0.2833	0.4089	92.91	18.08	111.1	2.215
4026	23.44	42.03	73.55	3.568	11.77	26.01	3.912	0.4444	3.541	0.2354	122.9	0.1918	0.2826	0.4146	91.54	17.11	108.6	2.187
4029	22.77	41.1	74.11	3.566	11.85	26.28	3.959	0.424	3.557	0.2255	115.6	0.1827	0.2855	0.4187	97.93	17.26	117	2.307
4031	22.32	40.3	74.54	3.64	11.92	26.28	3.951	0.4418	3.623	0.2266	116.1	0.1869	0.2853	0.4246	104.78	15.74	123.5	2.293
4032	23.38	42.03	73.34	3.471	11.73	25.75	3.868	0.4085	3.66	0.2386	116	0.1903	0.2839	0.4179	95.9	16.45	113.4	2.401
4033	23.55	42.25	73.64	3.523	11.79	25.82	3.885	0.4406	3.553	0.2355	118.8	0.2023	0.2872	0.4236	94.54	19.75	114.6	2.228
4034	22.97	41.41	74	3.57	11.85	26.2	3.939	0.4225	3.584	0.235	116.9	0.184	0.2876	0.4302	95.04	17.08	113	2.285
4035	22.83	41.41	73.9	3.498	11.84	26.01	3.911	0.4099	3.642	0.2195	115.3	0.1736	0.2803	0.403	95.64	18.81	115.4	2.472
4036	23.24	42.05	73.44	3.537	11.75	26.14	3.922	0.4282	3.511	0.2423	118.5	0.1942	0.2831	0.4154	92.01	17.37	109.3	2.189
4037	23.93	42.61	73.43	3.538	11.74	25.87	3.895	0.4353	3.62	0.2422	114.8	0.1865	0.2874	0.4424	94.37	17.02	112.2	2.262
4039	22.82	41.01	73.8	3.568	11.82	26.15	3.932	0.4461	3.573	0.2406	116.3	0.1862	0.283	0.4247	97.45	17.3	116.3	2.198
4040	23.42	41.81	73.71	3.549	11.8	25.82	3.879	0.439	3.605	0.241	117.9	0.1969	0.2879	0.4358	95.91	18.57	115.6	2.249
4042	23.54	42.28	73.19	3.535	11.71	26.01	3.907	0.4394	3.604	0.2382	125.7	0.1884	0.2918	0.4428	94.94	17.39	113.1	2.27
4043	23.88	42.53	73.1	3.463	11.7	25.71	3.865	0.4352	3.537	0.2275	113.5	0.2019	0.2787	0.4193	94.68	16.39	111.9	2.255
4044	23.38	42.04	73.38	3.607	11.74	25.88	3.892	0.4415	3.579	0.2441	119.2	0.1689	0.2834	0.4326	92.5	17.9	110.5	2.205
4045	23.59	42.66	73.42	3.462	11.75	25.59	3.86	0.4369	3.577	0.2438	120	0.181	0.2776	0.4086	96.2	19.82	116.9	2.224
4046	23.23	41.6	74.02	3.519	11.83	25.96	3.909	0.4445	3.595	0.246	119.4	0.2111	0.2892	0.4393	114.23	16.23	135.3	2.226
4047	23.36	41.79	73.59	3.522	11.78	25.83	3.869	0.4153	3.55	0.2435	116.9	0.1991	0.2851	0.4173	95.65	17.29	114	2.265
4048	22.79	41.33	73.96	3.543	11.84	26.19	3.929	0.4258	3.586	0.2224	118.6	0.1817	0.2905	0.4167	98.94	16.54	117.7	2.341
4049	24.11	42.9	72.77	3.509	11.64	25.64	3.845	0.4227	3.582	0.2415	117.9	0.1975	0.2833	0.4167	93.63	16.35	110.6	2.261
4050	23.03	41.43	74.25	3.636	11.88	26.43	3.969	0.4438	3.6	0.2317	115.3	0.1757	0.2928	0.4326	95.31	15.24	111.9	2.258
4052	22.88	41.39	74.1	3.567	11.86	26.21	3.926	0.4393	3.527	0.2283	114.8	0.1831	0.2903	0.4171	97.98	17.8	117.4	2.22
4053	23.76	42.91	73.07	3.476	11.7	25.82	3.887	0.4267	3.612	0.2349	118.9	0.1885	0.2877	0.4325	90.56	18.54	108.2	2.308
4054	23.79	42.33	73.33	3.505	11.74	25.62	3.851	0.4407	3.509	0.2447	118.2	0.2055	0.278	0.41	96.22	18.4	115.7	2.169
4055	23.31	41.82	73.67	3.486	11.79	25.97	3.896	0.4233	3.517	0.2408	113.6	0.2184	0.2844	0.3995	93.04	16.94	110.2	2.217
4056	23.75	42.05	73.64	3.59	11.78	25.88	3.902	0.4241	3.785	0.2356	115.4	0.178	0.2775	0.4313	93.83	16.21	110.8	2.419
4057	23.51	41.93	73.86	3.555	11.82	25.92	3.897	0.4363	3.569	0.2217	120.9	0.172	0.2848	0.4287	94.08	16.84	111.7	2.28
4058	23.02	41.4	73.78	3.541	11.8	25.99	3.907	0.4338	3.607	0.2284	116.3	0.1822	0.2858	0.4237	94.62	18.34	113.5	2.305
4059	23.72	42.2	73.64	3.539	11.79	25.89	3.908	0.4486	3.614	0.2379	117.8	0.1829	0.2903	0.4482	90.92	16.59	107.5	2.252
4060	24.2	42.97	73.02	3.432	11.68	25.54	3.843	0.4296	3.486	0.2451	117.5	0.2309	0.2774	0.4201	91.05	17.22	107.9	2.168
4064	23.15	42.12	73.88	3.522	11.83	25.94	3.909	0.4284	3.485	0.2437	112.1	0.2004	0.2777	0.4101	91.05	17.87	108.7	2.154
4065	23.32	41.76	73.59	3.559	11.79	25.96	3.889	0.4464	3.6	0.2346	122	0.1982	0.2888	0.4183	92.06	17.85	109.9	2.239
4067	23.14	41.94	73.88	3.5	11.81	25.75	3.877	0.4297	3.522	0.2356	113	0.2041	0.2792	0.4222	94.07	17.99	112.8	2.237
4068	23.14	41.72	73.89	3.548	11.81	25.99	3.91	0.4278	3.585	0.236	122.1	0.1597	0.2812	0.4076	94.34	16.93	112	2.276
4069	23.6	41.73	73.93	3.57	11.83	26.19	3.957	0.5053	3.592	0.2331	121	0.1745	0.2911	0.4177	93.13	16.65	110.3	2.115
4070	23.75	42.51	73.38	3.57	11.74	25.82	3.891	0.4241	3.556	0.2283	111.1	0.1875	0.283	0.4135	92.4	18	110.3	2.317
4071	22.92	41.61	73.89	3.576	11.82	26.21	3.937	0.4331	3.619	0.2351	115.8	0.1642	0.2863	0.4401	93.41	17.57	111.2	2.282
4072	23.41	42.18	73.73	3.543	11.81	25.93	3.91	0.4441	3.572	0.2285	119.3	0.1757	0.2875	0.4316	92.05	16.33	108.5	2.25
4073	23.96	42.46	73.11	3.518	11.69	25.44	3.82	0.4417	3.512	0.245	119.2	0.1944	0.278	0.4184	95.17	17.77	114	2.165
4074	23.54	41.57	74.08	3.608	11.86	26.3	3.967	0.4231	3.565	0.2349	115.6	0.1872	0.2929	0.4133	94.99	17.37	113.1	2.269
4075	24.02	42.53	73.23	3.521	11.72	25.97	3.896	0.4311	3.487	0.2405	119.2	0.205	0.2852	0.4098	89.7	16.58	105.8	2.162
4077	23.1	41.66	74.01	3.576	11.85	26.12	3.93	0.4365	3.601	0.228	115.8	0.1863	0.2878	0.4132	94.61	17.32	112.6	2.291
4079	23.48	42.15	73.99	3.545	11.84	26.14	3.934	0.4181	3.531	0.2316	112.4	0.1708	0.2857	0.4205	95.34	17.83	114.2	2.299
4080	22.73	41.08	74.01	3.542	11.83	26.34	3.967	0.4161	3.542	0.2355	115.9	0.1927	0.2898	0.3998	95.82	17.42	114.4	2.26
4082	22.99	40.92	74.17	3.606	11.86	26.52	3.997	0.4193	3.573	0.2286	117.9	0.1893	0.2918	0.4377	94.79	16.54	112.4	2.309
4083	26.01	43.73	70.36	3.561	11.25	24.42	3.664	0.4624	3.323	0.2518	137.8	0.1858	0.2728	0.3771	84.54	25.34	105.5	1.965
4086	23.81	42.31	73.47	3.536	11.75	25.79	3.876	0.4228	3.553	0.2386	116.5	0.1958	0.2821	0.4231	94.39	18.12	113.2	2.234
4087	24.12	42.6	73.28	3.569	11.72	25.58	3.844	0.4445	3.432	0.2311	116	0.2175	0.2833	0.4269	94.74	18.7	114.2	2.133
4088	22.67	40.83	74.3	3.635	11.89	26.46	3.971	0.4258	3.553	0.2195	113.6	0.1724	0.296	0.4132	97.13	17.48	116.4	2.305
4089	23.01	41.37	74.31	3.529	11.9	26.45	3.975	0.4382	3.614	0.2317	123.1	0.1909	0.2923	0.4616	96.48	16.12	114.1	2.285
4090	22.97	41.11	74.27	3.671	11.88	26.31	3.969	0.4319	3.615	0.2263	115.9	0.1799	0.2914	0.4278	96.1	16.83	114.3	2.315
4092	23.77	41.95	74.04	3.54	11.84	26.22	3.956	0.4275	3.619	0.2289	117.2	0.1705	0.2918	0.4513	93.45	17.34	111.2	2.317
4095	23.32	42.04	73.7	3.527	11.79	26.08	3.929	0.4182	3.597	0.2355	114.6	0.2079	0.2803	0.433	94.79	16.81	112.3	2.31
4096	23.43	42.08	73.51	3.501	11.76	25.75	3.872	0.4319	3.528	0.2324	116.9	0.184	0.2827	0.416	93.26	18.82	112.2	2.218
4097	23.09	41.7	74.2	3.524	11.89	25.94	3.913	0.4228	3.463	0.2212	121.9	0.1889	0.2895	0.418	102.67	20.03	124.5	2.239
4098	23.08	41.71	74.04	3.53	11.85	26	3.901	0.4457	3.544	0.2365	118.6	0.1906	0.2897	0.4394	93.7	15.19	109.7	2.187
4099	23.07	41.33	73.78	3.445	11.81	26.43	3.973	0.4369	3.578	0.2368	121.5	0.1903	0.2941	0.4605	94.06	15.13	110	2.241
4101	23.14	41.79	73.88	3.471	11.81	25.97	3.911	0.4283	3.5	0.2321	115.2	0.1954	0.2856	0.4199	96.96	17.75	116	2.247
4102	23.05	41.46	73.81	3.531	11.82	25.85	3.888	0.432	3.585	0.2358	122.1	0.1833	0.2862	0.4231	95.79	18.54	115.4	2.256
4103	23.56	42.04	73.45	3.541	11.74	25.83	3.888	0.4391	3.546	0.2317	119.9	0.1778	0.2849	0.4163	90.83	16.16	106.9	2.226
4104	23.95	42.66	72.84	3.475	11.65	25.83	3.888	0.4364	3.592	0.2513	119	0.2001	0.2824	0.4271	89.04	18.79	106.6	2.201
4108	22.86	41.35	74.08	3.453	11.84	25.78	3.878	0.4082	3.521	0.2129	112.5	0.1814	0.2813	0.405	97.69	19.04	118.2	2.388
4109	23.29	42	73.5	3.462	11.75	25.81	3.869	0.4248	3.588	0.2291	126.1	0.1837	0.2827	0.412	93.55	21.54	114.5	2.311
4110	23.22	41.92	73.76	3.571	11.81	25.78	3.871	0.4179	3.57	0.2286	119.1	0.1782	0.2827	0.403	96.05	20.01	116.7	2.321
4111	23.42	42.23	73.51	3.503	11.76	25.73	3.869	0.4153	3.548	0.2254	116.8	0.2031	0.2803	0.4063	93.69	19	112.7	2.333
4112	22.89	41.5	74.15	3.599	11.86	26.13	3.939	0.4142	3.552	0.2248	113.9	0.1792	0.2871	0.424	95.72	18.3	115.1	2.327
5001	23.52	42.08	73.05	3.481	11.68	25.44	NA	0.4303	3.515	0.2222	118.1	0.1956	0.2689	0.4124	90.89	25.54	114.7	2.239
5002	23.31	41.9	73.89	3.564	11.81	26	3.911	0.4237	3.477	0.2234	117.5	0.1913	0.2859	0.3982	94.38	24.56	118.4	2.257
5003	22.46	40.75	74.69	3.535	11.95	26.27	3.939	0.4075	3.388	0.213	109.1	0.2066	0.2812	0.4142	102.4	28.38	131.3	2.293
5005	23.16	41.6	73.99	3.543	11.85	25.97	3.907	0.431	3.408	0.2252	109.6	0.2693	0.2892	0.3992	94.72	24.25	118.4	2.174
5006	23.16	41.8	73.96	3.523	11.83	25.91	3.882	0.4504	3.473	0.2281	113.8	0.1764	0.2749	0.4017	96.35	19.96	116.9	2.148
5007	22.84	41.28	74.38	3.598	11.92	25.9	3.882	0.4247	3.504	0.2153	110.7	0.2109	0.2845	0.3935	101.92	20.81	124.6	2.311
5008	24.06	42.5	72.59	3.528	11.62	25.4	3.817	0.4476	3.395	0.242	113.5	0.2263	0.2723	0.395	89.56	18.88	107.5	2.081
5009	23.74	42.55	73.45	3.551	11.75	25.79	3.889	0.4256	3.483	0.2288	108.8	0.2313	0.2827	0.3992	93.91	21.86	115.4	2.218
5010	23.19	41.51	73.74	3.605	11.8	25.65	3.864	0.4236	3.455	0.2302	111.7	0.1853	0.2775	0.3961	98.63	24.62	123.6	2.193
5012	22.64	41.36	74.16	3.65	11.86	26.51	3.981	0.4271	3.609	0.2296	113.5	0.1789	0.291	0.4044	99.83	23.9	124.5	2.328
5013	23.49	41.41	73.74	3.524	11.8	25.87	3.902	0.4418	3.513	0.2215	119.5	0.2004	0.287	0.4357	93.3	22.52	115	2.245
5014	23.46	42.2	73.38	3.563	11.74	25.89	3.888	0.4248	3.488	0.2326	117	0.2129	0.282	0.4102	93.52	21.68	114.5	2.241
5015	22.99	41.23	73.45	3.481	11.74	25.6	3.847	0.4079	3.509	0.2348	125.9	0.2244	0.271	0.3986	101.86	25.34	127.9	2.289
5016	23.44	41.9	73.44	3.55	11.76	25.69	3.869	0.4458	3.414	0.2396	117.9	0.247	0.273	0.398	97.46	20.43	118.4	2.102
5017	24.4	42.19	72.54	3.522	11.6	25.64	3.854	0.4398	3.413	0.2352	110.2	0.2467	0.2752	0.4201	89.48	20.66	108.8	2.147
5018	23.71	42.26	73.17	3.491	11.71	25.69	3.859	0.4327	3.402	0.2383	113.7	0.2546	0.2761	0.4127	92.88	20.87	113	2.13
5019	22.47	40.21	74.29	3.564	11.9	26.04	3.917	0.4295	3.549	0.2223	117.7	0.1565	0.2811	0.4019	100.67	29.47	130.2	2.285
5020	23.44	41.73	73.44	3.484	11.74	25.46	3.821	0.4304	3.515	0.2218	115.7	0.1804	0.2773	0.4195	99.61	25.52	125.4	2.29
5021	23.57	41.97	73.42	3.508	11.74	25.82	3.862	0.4156	3.46	0.2345	112.4	0.2043	0.2853	0.4068	102.42	21.35	125	2.223
5022	22.69	41.13	73.82	3.524	11.82	26.1	3.911	0.4585	3.524	0.2286	117.9	0.1912	0.2759	0.4183	94.5	23.96	118	2.196
5023	23.32	41.69	73.62	3.603	11.78	25.82	3.872	0.4225	3.425	0.2257	114.2	0.2179	0.2819	0.3988	98.59	19.29	118.8	2.209
5024	23.58	41.81	73.82	3.614	11.81	26.22	3.936	0.4154	3.509	0.2322	116	0.1983	0.2859	0.4085	91.52	18.1	108.8	2.214
5025	23.86	42.14	73.63	3.501	11.78	25.47	3.813	0.4358	3.428	0.2237	112.4	0.2156	0.2808	0.4059	93.66	23.8	116.7	2.206
5027	22.89	41	74.2	3.549	11.88	26.4	3.967	0.4243	3.461	0.2264	120.5	0.1953	0.2924	0.4174	93.95	18.39	112.5	2.223
5028	23.48	41.76	73.56	3.653	11.76	25.66	3.855	0.4311	3.477	0.2251	107.9	0.1771	0.2774	0.3844	91.68	26.33	116.8	2.219
5029	23.68	41.78	73.19	3.641	11.72	26.15	3.923	0.417	3.482	0.2323	114	0.2206	0.2842	0.4078	89.41	16.56	105.3	2.243
5030	23.14	41.32	73.74	3.609	11.8	26.21	3.935	0.4078	3.438	0.2148	114.3	0.2321	0.289	0.4085	97.07	21.38	118.9	2.307
5031	22.84	40.99	73.8	3.526	11.81	25.79	3.876	0.4133	3.571	0.211	123	0.1579	0.2784	0.3901	98.94	22.22	121.8	2.425
5032	22.24	41.01	74.31	3.504	11.89	25.79	3.872	0.4161	3.472	0.2212	120.8	0.184	0.2805	0.4069	100.72	23.02	124.6	2.269
5033	23.44	41.61	73.62	3.625	11.79	25.81	3.862	0.4421	3.538	0.2213	115.5	0.2457	0.2905	0.4015	98.83	20.1	119.6	2.259
5034	23.16	41.72	73.85	3.565	11.82	26.26	3.957	0.4339	3.572	0.2308	114.5	0.2076	0.2874	0.4079	93.13	20.61	113.3	2.274
5035	22.87	41.1	74.21	3.58	11.88	25.2	3.787	0.4198	3.499	0.2227	118.6	0.1934	0.2748	0.3986	100.56	32.59	132.8	2.287
5037	23.56	42.4	73.2	3.547	11.71	25.94	3.896	0.422	3.477	0.2258	119.6	0.1958	0.2834	0.4013	95.33	22.66	117.5	2.23
5038	23.51	41.85	73.75	3.537	11.81	25.7	3.885	0.4428	3.43	0.2273	120.5	0.2206	0.2821	0.3892	95.25	21.26	116.3	2.162
5039	23.51	42.35	73.62	3.555	11.78	25.93	3.894	0.4255	3.455	0.2267	114.6	0.2263	0.2811	0.3956	96.55	24.51	120.8	2.221
5040	22.59	41.09	74.38	3.584	11.9	25.58	3.843	0.4239	3.475	0.2163	110.8	0.1836	0.2788	0.3975	102.67	32.99	135.8	2.256
5043	22.77	41.01	74.1	3.526	11.85	25.79	3.88	0.4501	3.441	0.2321	116.8	0.2241	0.2854	0.4284	103.57	23.74	128.6	2.139
5044	22.87	41.77	73.77	3.7	11.8	26.61	4.013	0.4371	3.478	0.236	117	0.2231	0.2884	0.4059	94.78	16.05	111.3	2.211
5045	23.84	42.32	73.18	3.635	11.71	26.15	3.924	0.432	3.462	0.2395	121.4	0.2187	0.2885	0.409	91.83	17.56	109.1	2.173
5046	22.91	41.57	74.24	3.585	11.89	25.85	3.883	0.4238	3.411	0.2247	116.1	0.2138	0.2842	0.3799	98.46	26.67	125	2.186
5047	22.54	40.87	74.19	3.598	11.86	26.11	3.917	0.4412	3.436	0.2258	117.4	0.1929	0.284	0.4072	98	28.08	125.8	2.162
5048	22.72	41.31	74.47	3.659	11.92	25.8	3.872	0.4398	3.489	0.2134	111.4	0.1555	0.2805	0.3744	102.04	28.41	130.7	2.246
5049	23.37	41.44	74.03	3.594	11.84	26.44	4.005	0.4298	3.56	0.2262	112.4	0.1981	0.2954	0.3977	95.01	21.73	116.6	2.289
5051	23.81	41.59	73.22	3.662	11.72	25.98	3.919	0.4368	3.595	0.2418	116.7	0.1876	0.2843	0.4106	97.87	19.85	118.6	2.227
5052	23.97	42.67	72.75	3.527	11.63	25.76	3.866	0.4123	3.605	0.2385	117.2	0.189	0.2757	0.4196	88.23	14.8	102.1	2.298
5055	24.2	43.15	72.51	3.475	11.6	25.35	3.814	0.403	3.507	0.2351	115.6	0.2299	0.2766	0.4	88.73	22.32	109.4	2.291
5056	23.66	41.97	72.52	3.671	11.6	25.97	3.889	0.4323	3.604	0.242	113.9	0.2124	0.2898	0.4065	89.12	18.24	106.5	2.231
5057	23.75	42.13	73.06	3.558	11.69	25.05	3.756	0.4256	3.575	0.2317	112.7	0.1992	0.2729	0.3971	95.13	28.27	122.4	2.297
5058	23.51	41.84	73.09	3.607	11.7	26.25	3.935	0.4284	3.518	0.2389	120.1	0.2016	0.2805	0.4244	93.28	18.54	111.5	2.224
5060	24.91	43.51	72.31	3.499	11.57	25.5	3.826	0.4196	3.509	0.2567	114.9	0.2207	0.2767	0.4143	86.19	9.12	95	2.144
5061	24.18	42.61	73.09	3.653	11.7	25.51	3.833	0.443	3.447	0.2297	120.4	0.1961	0.2774	0.419	93.08	16.52	109.8	2.162
5062	23.54	41.57	73.02	3.52	11.69	25.33	3.803	0.423	3.509	0.2418	114.4	0.2117	0.2734	0.3831	94.27	32.66	125.4	2.19
5063	23.53	41.37	73.91	3.748	11.83	26.4	3.993	0.4359	3.595	0.2262	112.6	0.1413	0.2842	0.3932	92.46	18.67	111	2.288
5064	22.81	41.05	74.18	3.658	11.87	25.75	3.879	0.428	3.482	0.2279	119.4	0.2061	0.2807	0.3943	101.45	25.68	127.7	2.195
5065	22.89	40.6	74.16	3.646	11.87	25.83	3.886	0.4245	3.445	0.2307	116.6	0.1839	0.2773	0.3954	96.74	37.75	132.6	2.207
5066	23.1	41.44	73.68	3.561	11.79	25.42	3.805	0.4205	3.379	0.2244	111.6	0.2257	0.2725	0.3865	100.1	33.21	132.6	2.191
5067	23.57	42.29	73.47	3.677	11.75	25.85	3.876	0.4247	3.591	0.2342	115.7	0.1685	0.2896	0.4017	95.2	18.26	113.9	2.281
5068	22.81	41.01	74	3.56	11.85	26.14	3.922	0.4132	3.599	0.2216	114.6	0.1859	0.2819	0.4009	100.89	20.6	122.8	2.403
5069	23.37	41.54	73.46	3.714	11.76	26.06	3.916	0.4133	3.549	0.2287	113.1	0.197	0.2856	0.4022	92.58	19.71	111.6	2.256
5070	23	41.29	74.4	3.795	11.91	26.56	4.018	0.4011	3.608	0.2201	111	0.1885	0.2896	0.4122	97.56	21.88	119.9	2.437
5071	23.25	41.39	74.11	3.682	11.85	25.96	3.914	0.4335	3.69	0.2284	116.7	0.1838	0.288	0.4111	92.52	28.7	119.6	2.368
5072	23.84	41.79	73.58	3.72	11.77	26.17	3.946	0.4224	3.642	0.2371	114.5	0.2194	0.2926	0.4032	92.9	20.36	112.8	2.343
5073	22.98	41.4	74.22	3.685	11.88	26.35	3.962	0.4363	3.588	0.2294	116.3	0.1675	0.2918	0.3989	97.18	19.53	117.6	2.299
5074	23.15	41.46	73.86	3.604	11.83	26.45	3.995	0.4633	3.643	0.2244	124.3	0.1718	0.2971	0.4146	97.3	16.19	114.4	2.235
5075	23.14	41.95	73.69	3.678	11.77	26.37	3.978	0.4423	3.637	0.2234	124.1	0.2021	0.2953	0.4067	95.66	16.6	112.9	2.296
5076	22.88	41.47	73.52	3.603	11.76	25.93	3.902	0.4378	3.482	0.2404	115.6	0.2267	0.2907	0.3927	93.84	23.47	116.4	2.163
5077	24	42.01	73.5	3.64	11.76	26.06	3.911	0.4369	3.564	0.2326	117	0.2343	0.2951	0.4352	89.08	16.54	105	2.266
5078	23.42	42.05	73.1	3.588	11.71	26.12	3.933	0.4386	3.584	0.2467	116.7	0.1949	0.2884	0.4172	88.51	15.46	103.2	2.225
5079	22.82	41.46	73.46	3.644	11.76	26.01	3.897	0.4281	3.584	0.2373	118.4	0.1624	0.2798	0.4051	101.44	20.2	122.8	2.253
5080	23.89	42.35	73.26	3.592	11.71	25.37	3.811	0.4476	3.556	0.2374	112.5	0.2008	0.2729	0.3871	93.73	22.58	115.5	2.166
5081	23.48	42.18	73.58	3.56	11.77	25.86	3.87	0.4448	3.521	0.2207	118	0.2076	0.2857	0.4063	92.22	20.3	112	2.231
5082	23.18	41.45	73.83	3.624	11.82	26.13	3.912	0.4171	3.558	0.2209	116.1	0.1871	0.2948	0.4045	98.19	25.17	123.1	2.331
5083	23.74	41.42	72.8	3.613	11.65	25.53	3.831	0.4281	3.548	0.231	113.4	0.1749	0.2833	0.4066	91.97	23.72	114.6	2.253
5084	24.31	42.89	72.46	3.544	11.59	25.56	3.844	0.4503	3.511	0.2459	119.3	0.2652	0.2848	0.4262	89.24	19.69	107.9	2.135
5085	23.68	41.81	73.54	3.624	11.77	25.54	3.837	0.4624	3.6	0.2243	116.2	0.1562	0.2935	0.4066	100.5	25.3	126.6	2.239
5086	23.78	42.05	73.11	3.616	11.7	25.68	3.86	0.432	3.612	0.2424	116.3	0.2436	0.2924	0.4089	94.3	18.99	113.4	2.222
5087	23.45	41.76	73.28	3.526	11.71	25.14	3.767	0.4312	3.536	0.2365	120.1	0.2146	0.2815	0.4093	100.09	27.5	127.9	2.244
5088	23.69	41.54	72.88	3.593	11.67	25.58	3.852	0.4324	3.471	0.2525	110.1	0.2571	0.2853	0.4079	92.04	27.52	117.7	2.119
5089	22.76	40.97	74.14	3.611	11.86	26.35	3.957	0.4356	3.657	0.2405	118.6	0.1929	0.3012	0.43	98.93	19.76	119.4	2.287
5090	23.19	41.37	74.1	3.599	11.86	25.95	3.913	0.4137	3.559	0.2262	119.4	0.1803	0.292	0.4011	97.44	28.8	125.6	2.333
5092	23.74	42.21	72.79	3.659	11.65	25.5	3.827	0.4453	3.557	0.2336	117.6	0.2525	0.2843	0.4169	94.57	22.65	116.9	2.211
5093	24.08	42.55	73	3.585	11.68	25.91	3.893	0.4383	3.572	0.2434	115.4	0.1962	0.2904	0.4201	86.03	11.37	96.7	2.223
5095	23.34	41.52	74	3.626	11.85	26.15	3.956	0.443	3.697	0.2357	119.6	0.1549	0.2889	0.4052	93.96	19.48	113.2	2.336
5096	22.79	40.83	74	3.756	11.84	26.3	3.957	0.432	3.461	0.2377	113.4	0.2179	0.2831	0.4288	99.76	22.11	123	2.176
5097	23.69	42.2	73.76	3.588	11.79	26.29	3.965	0.4366	3.565	0.2341	119.6	0.2001	0.2891	0.4179	90.37	16.98	107	2.221
5098	23.7	42.12	73.08	3.566	11.68	26.21	3.956	0.4286	3.517	0.2445	119.9	0.1954	0.2938	0.4225	92.27	17.23	109.4	2.194
5099	22.88	40.79	74.37	3.565	11.92	26.21	3.934	0.4508	3.587	0.2279	122.5	0.1714	0.2936	0.4049	102.77	19.96	124.6	2.212
5100	23.52	42.15	73.5	3.395	11.74	25.02	3.744	0.4471	3.456	0.2264	121.2	0.1994	0.2835	0.4088	99.35	27.44	126.9	2.176
5101	23.32	41.89	73.59	3.586	11.77	25.86	3.89	0.4411	3.53	0.2304	121	0.1702	0.2896	0.422	96.17	22	118.1	2.212
5102	23.33	41.91	73.65	3.554	11.79	25.72	3.877	0.4165	3.429	0.2428	115.4	0.2461	0.2751	0.3935	93.44	25.28	117.6	2.147
5103	23.08	40.79	74.28	3.741	11.89	26.63	4.009	0.4398	3.528	0.2267	112.9	0.1936	0.2975	0.4048	96.93	17.47	115.2	2.206
5104	22.52	40.91	74.7	3.49	11.95	25.85	3.89	0.4225	3.586	0.2134	114.6	0.2057	0.2833	0.3951	103.82	34.35	138	2.406
5105	23.51	41.77	73.94	3.618	11.82	26.19	3.952	0.4378	3.578	0.2345	118.5	0.2082	0.288	0.4255	93.7	22.38	115.2	2.237
5108	23.54	41.9	73.76	3.601	11.8	26.04	3.931	0.4429	3.522	0.2306	110.7	0.2019	0.2865	0.4198	96.92	21.53	118.6	2.2
5109	22.86	41.18	74.36	3.632	11.9	25.85	3.887	0.4294	3.503	0.2137	114.8	0.1608	0.2766	0.4032	99.85	35.55	134.5	2.307
5110	23.48	41.75	73.69	3.615	11.79	26.05	3.917	0.4121	3.58	0.2166	113.4	0.1747	0.2868	0.3998	96.32	21.65	117.8	2.437
5111	23.05	41.16	73.69	3.592	11.79	25.92	3.893	0.4327	3.581	0.2437	114.8	0.219	0.2836	0.4137	94.24	22.84	116.4	2.252
5112	23.24	41.58	74.06	3.575	11.85	26.42	3.977	0.413	3.496	0.2255	115.3	0.1769	0.2929	0.4086	96	17.04	113.8	2.292
5113	23.58	42.2	73.83	3.607	11.81	25.99	3.911	0.4626	3.542	0.2344	122.6	0.1621	0.2858	0.4049	96.97	17.06	114.8	2.152
5114	23	41.46	74.4	3.502	11.9	26.47	3.993	0.4328	3.58	0.2275	123.3	0.1738	0.2871	0.4413	91.73	12.5	104.6	2.291
5115	23.37	42.3	73.58	3.507	11.77	26.42	3.974	0.4232	3.527	0.2432	121.4	0.1836	0.2882	0.4304	94.61	9.77	106	2.214
5116	23.26	41.81	73.79	3.528	11.82	26.54	3.98	0.4252	3.576	0.2373	116.6	0.1851	0.2893	0.4418	92.27	13.76	106.6	2.256
5117	23.1	41.62	73.94	3.572	11.82	26.12	3.923	0.4213	3.524	0.2179	110.5	0.1869	0.2884	0.3935	96.48	20.39	117	2.292
5119	23.9	42.32	73.06	3.457	11.69	25.53	3.836	0.427	3.455	0.2328	110.6	0.2568	0.2829	0.4072	92.59	23.62	115	2.18
5120	22.83	40.81	73.67	3.545	11.79	25.9	3.889	0.4297	3.524	0.2325	113.1	0.2242	0.2873	0.4161	100.27	23.31	124.5	2.233

## Sheet: Lincoln
Ptype ID	ADF	NDF	DOMD	Cfat	ME	CP	N	Ca	K	Mg	Mn	Na	P	S	LMW_WSC	HMW_WSC	Total_WSC	Tetany ratio
1001	26.93	44.49	72.42	3.931	11.59	21.5	3.292	0.4912	3.36	0.2147	157.4	0.3515	0.3413	0.4063	98.64	33.1	132	2.075
1002	26.59	44.19	72.57	3.992	11.62	21.49	3.296	0.4895	3.332	0.213	145.5	0.3736	0.3387	0.3879	99.01	39.5	138.4	1.993
1003	26.83	44.49	72.32	3.885	11.57	21.34	3.278	0.4738	3.351	0.2105	150.6	0.3559	0.3388	0.3891	98.66	37.07	136	2.104
1004	26.73	44.34	72.54	3.939	11.6	21.23	3.26	0.491	3.315	0.2067	148.9	0.3617	0.3349	0.3897	99.76	40.57	142.1	2.03
1006	26.85	44.57	72.44	3.934	11.59	21.34	3.274	0.4771	3.316	0.21	150	0.3454	0.3336	0.3892	98.35	42.67	140.7	2.04
1008	26.69	44.22	72.66	3.795	11.62	21.07	3.234	0.4566	3.185	0.1937	143.6	0.2836	0.33	0.3589	99.71	48.88	150.1	2.076
1009	26.76	44.38	72.45	3.821	11.59	21.27	3.261	0.4732	3.293	0.2106	150.2	0.3724	0.3327	0.3867	99.2	41.22	141.9	2.059
1010	26.93	44.66	72.26	3.925	11.56	21.38	3.278	0.4948	3.282	0.2187	154.4	0.3684	0.3291	0.3771	96.57	38.74	134.2	1.953
1011	26.97	44.59	72.19	3.936	11.56	21.41	3.283	0.4864	3.29	0.2089	146.7	0.3584	0.3311	0.3749	97.51	36.63	132.9	2.028
1013	26.77	44.43	72.43	3.955	11.59	21.56	3.306	0.4812	3.353	0.2046	143.7	0.3375	0.3356	0.3834	98.19	34.37	132.3	2.138
1014	26.86	44.37	72.55	3.97	11.61	21.43	3.293	0.477	3.377	0.217	145.8	0.3594	0.3338	0.3852	100.02	34.73	136.1	2.074
1015	26.85	44.39	72.29	3.905	11.57	21.5	3.295	0.5113	3.378	0.2224	156.2	0.3751	0.339	0.4003	98.59	30.55	128.2	1.942
1017	26.79	44.48	72.49	3.814	11.6	21.53	3.302	0.476	3.307	0.2097	150.1	0.3498	0.3286	0.378	97.57	38.9	135.3	2.054
1018	26.96	44.64	72.24	3.997	11.56	21.49	3.294	0.4901	3.34	0.207	151.5	0.3591	0.336	0.391	99.23	34.23	133.7	1.997
1019	26.89	44.47	72.18	3.878	11.55	21.28	3.26	0.4939	3.342	0.2019	150.6	0.3514	0.3357	0.3816	99.92	38.75	139.5	2.122
1021	26.86	44.68	72.2	4.058	11.55	21.27	3.265	0.4998	3.344	0.2099	155.9	0.2984	0.3387	0.3948	101.81	36.86	141	2.013
1023	27.21	44.84	72.18	3.925	11.55	21.45	3.289	0.4853	3.372	0.2135	152.7	0.3601	0.3328	0.3919	95.22	36.23	128.9	2.112
1024	27.27	44.94	71.93	4.05	11.51	21.5	3.3	0.489	3.353	0.2212	153.3	0.3997	0.3399	0.4056	97.2	31.35	126.4	1.989
1025	26.97	44.53	72.54	3.898	11.61	21.41	3.273	0.4724	3.339	0.2059	145.1	0.3365	0.3314	0.3803	98.8	37.4	136.1	2.137
1026	27.09	44.66	72.23	3.894	11.56	21.38	3.278	0.5163	3.268	0.2173	156.9	0.4119	0.34	0.4049	96.97	36.17	131.3	1.897
1027	27.11	44.86	72.38	3.87	11.58	21.38	3.279	0.4753	3.342	0.2074	149	0.3673	0.3332	0.3884	99.59	35.42	135.8	2.116
1028	26.79	44.34	72.44	3.868	11.59	21.3	3.266	0.4755	3.311	0.2054	147.2	0.3682	0.3357	0.3909	99.32	38.45	139.2	2.104
1029	26.71	44.31	72.44	3.951	11.59	21.55	3.306	0.4918	3.4	0.2107	145.4	0.3161	0.3373	0.3901	100.59	33.71	135	2.058
1030	26.32	44.02	72.74	4.032	11.63	21.65	3.321	0.481	3.319	0.1994	137.3	0.3487	0.3249	0.3792	101.43	37.48	141.8	2.161
1031	26.98	44.59	72.49	3.909	11.59	21.36	3.278	0.5043	3.396	0.2094	146.8	0.3145	0.3322	0.3751	97.99	39.93	137.6	2.102
1032	27.08	44.77	72.09	3.982	11.54	21.59	3.311	0.4994	3.33	0.2066	147.3	0.3819	0.3391	0.3886	97.15	31.85	127.9	2.047
1033	26.93	44.43	72.33	3.892	11.58	21.37	3.284	0.467	3.473	0.2069	146.6	0.3169	0.3386	0.3934	102.54	35.81	141.3	2.248
1037	26.94	44.82	72.51	3.878	11.6	21.3	3.267	0.4689	3.438	0.2011	143.8	0.3665	0.3304	0.3794	98.27	38.49	136.5	2.27
1038	26.62	44.24	72.57	3.991	11.61	21.52	3.302	0.4738	3.351	0.2073	141.1	0.3321	0.3359	0.3874	98.93	36.99	136.3	2.097
1039	26.91	44.71	72.31	4.017	11.57	21.44	3.294	0.5159	3.371	0.2151	158.7	0.3208	0.3361	0.4051	98.16	36.95	134.5	2.02
1040	26.63	44.09	72.67	3.89	11.63	21.16	3.245	0.4576	3.375	0.203	149.3	0.3034	0.3362	0.3971	99.54	47.09	147.7	2.171
1043	26.98	44.61	72.37	3.926	11.58	21.3	3.267	0.514	3.353	0.2151	151.8	0.3515	0.343	0.3966	98.22	34.58	131.8	1.928
1044	26.84	44.51	72.48	4.008	11.6	21.53	3.305	0.4816	3.422	0.2093	148.2	0.3217	0.3353	0.3931	98.45	34.92	133	2.152
1045	26.96	44.68	72.35	4.036	11.57	21.38	3.286	0.4981	3.308	0.211	151.3	0.3893	0.3315	0.3901	99.03	42.17	141.3	1.986
1047	26.77	44.22	72.51	3.91	11.6	21.42	3.289	0.488	3.417	0.2098	145.9	0.3536	0.3365	0.3908	99.92	37	138.1	2.111
1048	27.14	45	72.17	3.999	11.55	21.46	3.295	0.49	3.401	0.2125	151.7	0.3713	0.3303	0.3792	97.96	31.36	128.2	2.097
1049	27.17	44.76	72.35	3.891	11.57	21.57	3.303	0.5265	3.269	0.215	147.3	0.3988	0.3357	0.3857	94.81	35.26	127.1	1.916
1051	26.88	44.52	72.38	3.935	11.58	21.44	3.291	0.4921	3.35	0.2112	149.3	0.3607	0.335	0.391	98.38	36.56	134.6	2.053
1053	27.03	44.7	72.23	3.999	11.56	21.38	3.28	0.5169	3.409	0.2186	150.6	0.3706	0.3305	0.3866	96.88	31.75	127.1	1.966
1056	26.82	44.5	72.47	3.925	11.59	21.43	3.284	0.4799	3.361	0.2053	159.8	0.3116	0.3342	0.3826	98.64	38.07	136.5	2.099
1057	26.82	44.44	72.29	3.984	11.57	21.39	3.286	0.5084	3.337	0.2118	149.3	0.3795	0.3357	0.3925	99.09	37.16	137.6	2.007
1059	26.52	44.29	72.73	3.819	11.64	20.98	3.223	0.4736	3.315	0.1999	151.7	0.2943	0.3278	0.3772	99.14	47.56	148.3	2.169
1060	26.9	44.33	72.49	3.981	11.59	21.44	3.292	0.4707	3.468	0.2079	152	0.3469	0.3371	0.4095	100.09	32.64	133.1	2.234
1062	26.75	44.58	72.4	4.111	11.59	21.37	3.279	0.4883	3.3	0.2128	146.5	0.4225	0.3345	0.3864	98.27	38.7	136.5	2.024
1063	26.93	44.56	72.36	3.963	11.58	21.61	3.312	0.5096	3.365	0.2212	148.7	0.4328	0.3371	0.3996	97.07	33.52	128.3	1.994
1064	26.81	44.54	72.43	4.01	11.59	21.56	3.303	0.4912	3.327	0.2142	159.3	0.3628	0.3373	0.3962	98.45	35.35	133.1	1.97
1066	26.9	44.56	72.25	3.95	11.56	21.43	3.285	0.4792	3.333	0.2114	154.1	0.345	0.3352	0.3944	98.74	36.45	134.8	2.039
1067	26.61	44.2	72.5	3.929	11.6	21.28	3.271	0.5	3.289	0.208	149.1	0.3306	0.3342	0.3841	99.73	42.77	144.7	1.994
1068	26.8	44.57	72.39	4.022	11.58	21.52	3.299	0.5116	3.439	0.2208	153.4	0.3677	0.335	0.4004	96	37.79	131.5	2.054
1070	26.57	44.05	72.52	3.942	11.6	21.5	3.296	0.4869	3.416	0.2174	155.1	0.3455	0.3429	0.3955	99.62	36.81	137.3	2.051
1071	27.09	45.02	72.33	4.001	11.57	21.61	3.313	0.5123	3.467	0.2169	155.1	0.3845	0.3387	0.4028	97.53	30.16	126.5	2.084
1072	26.44	44.01	72.67	3.875	11.62	21.26	3.27	0.4794	3.325	0.2023	150.5	0.3068	0.3334	0.3835	99.86	42.43	144.6	2.115
1073	27.05	44.71	72.12	4.09	11.54	21.32	3.273	0.4796	3.461	0.2112	157	0.331	0.3415	0.4038	99.22	31.95	131.7	2.183
1076	27.37	44.9	71.9	3.967	11.51	21.5	3.298	0.4936	3.42	0.2204	153.9	0.4056	0.3421	0.4046	96.87	29.2	123.6	2.032
1077	26.65	44.3	72.47	3.92	11.6	21.25	3.269	0.4737	3.324	0.2094	152.4	0.3272	0.3407	0.3931	99.46	44.23	145.2	2.046
1078	26.96	44.63	72.27	3.979	11.57	21.42	3.287	0.5022	3.393	0.2184	150.7	0.3494	0.3357	0.3853	98.1	34.9	133	2.037
1081	27.2	45.14	71.97	3.977	11.51	21.69	3.336	0.504	3.435	0.2231	158.4	0.4157	0.3372	0.4183	94.97	32.68	124.5	2.071
1082	26.76	44.63	72.58	4.014	11.61	21.53	3.302	0.4955	3.435	0.2045	150.8	0.3097	0.3296	0.3808	99.43	36.3	135.9	2.147
1083	27.05	44.76	72.25	3.903	11.55	21.02	3.225	0.4811	3.234	0.2046	148.6	0.4373	0.332	0.3731	97.29	43.6	140.4	2.007
1084	27.15	44.77	72.09	3.933	11.53	21.69	3.332	0.5041	3.397	0.2163	153	0.3808	0.336	0.3992	96.33	32.46	126.6	2.025
1085	27.31	44.81	71.81	3.856	11.49	21.47	3.297	0.5112	3.346	0.2145	148.8	0.3878	0.3369	0.3827	96.36	35.47	129.3	1.977
1086	26.91	44.65	72.34	3.878	11.57	21.19	3.258	0.4927	3.275	0.2096	145	0.3632	0.3304	0.3817	96.01	41.99	136.1	1.986
1089	26.86	44.36	72.52	3.988	11.6	21.47	3.291	0.5123	3.463	0.2071	145.1	0.3618	0.3374	0.3935	98.77	31.6	130.8	2.112
1090	26.85	44.2	72.47	3.94	11.59	21.72	3.335	0.4996	3.495	0.2066	142.6	0.3276	0.3353	0.3867	100.48	33.65	135.6	2.189
1092	26.42	44.07	72.7	3.842	11.63	21.02	3.229	0.447	3.183	0.1907	141.7	0.296	0.3195	0.3496	99.19	53.22	153.8	2.147
1093	27	44.61	72.18	3.82	11.55	21.3	3.266	0.5023	3.351	0.2118	148.7	0.3763	0.3405	0.4027	100.63	35.42	137.7	2.053
1095	27.05	44.84	72.26	4.014	11.56	21.46	3.298	0.4865	3.329	0.2112	151.7	0.4695	0.3394	0.3922	97.53	32.25	128.4	2.064
1096	26.9	44.46	72.39	4.003	11.58	21.44	3.293	0.4692	3.376	0.2062	149.9	0.341	0.3337	0.3859	98.3	36.26	134.4	2.196
1097	27.24	44.89	72.2	3.907	11.56	21.56	3.31	0.501	3.507	0.2095	145.2	0.3667	0.3346	0.3872	95.09	33.07	125.3	2.186
1098	26.97	44.49	72.26	3.97	11.57	21.24	3.259	0.4962	3.273	0.2113	148.4	0.4181	0.3319	0.3886	97.81	39.24	136.6	2.005
1099	27.1	44.79	72.18	3.942	11.55	21.4	3.283	0.4989	3.337	0.2212	152.7	0.4439	0.3359	0.4032	97.25	35.08	130	1.977
1100	26.52	44.3	72.8	3.914	11.65	21.55	3.31	0.4629	3.469	0.2035	143.6	0.3548	0.3371	0.3877	98.63	31.66	128.6	2.352
1101	26.77	44.6	72.46	4.052	11.6	21.64	3.319	0.4926	3.439	0.2181	144.3	0.3477	0.3329	0.3863	99	32.29	131.1	2.1
1102	26.93	44.66	72.33	3.983	11.57	21.34	3.275	0.4921	3.346	0.211	151.7	0.3902	0.3332	0.3903	100.39	34.93	136.2	2.012
1103	27.09	44.81	72.26	3.888	11.56	21.34	3.272	0.5054	3.364	0.2153	152.4	0.3647	0.3361	0.3997	96.44	38.52	132.4	1.986
1105	27.14	44.68	72.29	3.862	11.57	21.47	3.297	0.5004	3.315	0.2184	146	0.4076	0.3311	0.3829	97.05	34.06	129.9	1.986
1108	26.97	44.85	72.3	3.962	11.56	21.56	3.311	0.4712	3.371	0.2101	149.3	0.3568	0.3307	0.3782	96.26	36.76	130.9	2.168
1109	27.02	44.38	72.35	4.043	11.58	21.58	3.311	0.5173	3.447	0.2221	153.7	0.4155	0.3402	0.3988	100.04	30.63	130.9	2.026
1110	26.86	44.56	72.44	3.947	11.59	21.5	3.294	0.4785	3.4	0.2086	146.7	0.3125	0.3381	0.3897	99.04	34.61	133.5	2.163
1112	26.79	44.79	72.42	3.907	11.59	21.46	3.298	0.4799	3.326	0.2065	150.6	0.3252	0.3302	0.3816	99.15	39.47	139.3	2.098
1113	26.83	44.18	72.36	4.021	11.57	21.29	3.266	0.511	3.32	0.2199	155.6	0.3515	0.3445	0.392	101.21	35.62	138.5	1.884
1114	26.84	44.32	72.51	4.069	11.6	21.76	3.338	0.4978	3.423	0.2193	143.1	0.4047	0.3391	0.3942	99.25	27.79	127.1	2.027
1115	26.95	44.58	72.3	3.906	11.57	21.21	3.257	0.5016	3.321	0.2069	156.1	0.3376	0.3385	0.389	98.01	43.85	141.2	2.02
1116	26.91	44.88	72.26	3.912	11.56	21.41	3.285	0.4763	3.372	0.2055	148.6	0.3283	0.3307	0.381	97.29	33.95	130.2	2.206
1119	27.05	44.66	72.31	3.893	11.56	21.59	3.315	0.5155	3.338	0.2165	155.4	0.35	0.3381	0.3882	96.27	34.39	128	1.985
1121	26.87	44.44	72.33	3.872	11.58	21.08	3.239	0.4831	3.262	0.2146	159.8	0.3579	0.3284	0.384	98.11	44.39	142.4	1.996
1124	26.84	44.76	72.44	3.949	11.6	21.41	3.285	0.5113	3.309	0.2234	152.7	0.4022	0.3366	0.3947	96.95	36.22	132.2	1.918
1125	26.82	44.58	72.48	3.954	11.59	21.36	3.278	0.4877	3.316	0.2066	145.8	0.3834	0.3323	0.3779	97.83	33.35	128.6	2.023
1126	26.95	44.56	72.45	3.996	11.6	21.58	3.307	0.4728	3.44	0.2089	145.1	0.3067	0.3378	0.3855	96.53	33.75	128.2	2.235
1128	26.69	44.37	72.32	3.951	11.57	21.02	3.225	0.45	3.269	0.1969	151.6	0.3272	0.3272	0.3617	100.25	44.64	147.1	2.198
1129	26.76	44.55	72.38	3.923	11.58	21.37	3.281	0.4822	3.346	0.2085	146.3	0.3555	0.3308	0.3807	97.74	39.38	136.5	2.048
1130	27.24	44.83	72.03	3.986	11.52	21.52	3.303	0.503	3.466	0.2206	149.8	0.3648	0.3381	0.4011	96.17	32.19	125.6	2.057
1131	26.88	44.5	72.49	3.917	11.6	21.36	3.283	0.4856	3.352	0.2171	154.4	0.3367	0.3347	0.4036	99.2	37.59	137.5	2.045
1132	26.94	44.66	72.4	3.848	11.58	21.57	3.311	0.486	3.394	0.2211	153.4	0.3589	0.3349	0.3918	97.84	33.76	131.1	2.075
2001	26.92	44.44	72.81	3.913	11.65	21.43	3.287	0.5017	3.414	0.1988	144.3	0.3867	0.3343	0.4046	97.93	35.81	133	2.145
2002	27.14	44.62	72.2	3.883	11.56	21.61	3.317	0.4928	3.417	0.2223	159.2	0.3179	0.3319	0.3962	96.57	34.46	129	2.089
2004	27.3	44.96	71.61	3.963	11.46	21.58	3.308	0.4876	3.325	0.2118	155.9	0.2857	0.3356	0.3882	95.63	37.95	131.8	2.076
2005	26.36	44.25	72.71	4	11.63	21.57	3.307	0.4835	3.386	0.2026	140.6	0.3173	0.3319	0.3896	100.05	35.89	137.2	2.172
2006	27.26	45	72	3.902	11.52	21.54	3.304	0.4753	3.429	0.2103	146.7	0.3282	0.3396	0.3991	95.11	36.77	129.2	2.124
2007	27.33	44.82	72.19	4	11.55	21.63	3.321	0.5147	3.47	0.2211	170.6	0.3427	0.3428	0.4213	96.32	30.82	124.9	2.076
2008	27.25	45.01	72.32	4.008	11.57	21.74	3.333	0.4697	3.504	0.1989	147.7	0.2966	0.3295	0.3983	92.27	38.05	126.2	2.291
2009	26.49	44.36	72.87	3.998	11.66	21.62	3.314	0.483	3.409	0.2056	141.6	0.3055	0.3358	0.3863	97.13	38.74	134.8	2.119
2010	27.43	45.5	71.91	3.961	11.51	21.42	3.282	0.4961	3.331	0.2248	153.3	0.3056	0.3327	0.3804	93.92	39.38	130	1.947
2011	26.07	43.5	72.88	3.816	11.67	21.31	3.269	0.4796	3.364	0.2039	144.9	0.2704	0.3336	0.388	104.56	32.83	141	2.068
2012	26.31	44.11	72.73	4.006	11.63	21.54	3.306	0.4758	3.32	0.2065	142	0.3307	0.3309	0.3892	101.56	35.32	138.6	2.101
2013	27.27	45.09	71.71	3.893	11.48	21.49	3.305	0.4737	3.298	0.2187	151.6	0.3635	0.3296	0.3882	95	34.2	126.8	2.038
2014	26.85	44.45	72.42	3.877	11.59	21.81	3.342	0.4977	3.472	0.2157	145.9	0.3246	0.3319	0.3974	98.76	31.18	129.3	2.085
2015	27.87	45.17	71.51	3.909	11.44	21.57	3.313	0.4772	3.427	0.2372	159.3	0.3731	0.3341	0.3945	92.88	33.42	121.7	2.049
2016	27.64	45.49	72.28	3.952	11.56	21.74	3.334	0.512	3.408	0.2123	150.6	0.3806	0.3412	0.4045	92.94	33.58	122.3	2.073
2017	26.88	44.54	72.52	3.981	11.6	21.43	3.283	0.5	3.361	0.2093	149.1	0.3722	0.3401	0.3938	98.26	35.72	134.3	2.037
2018	26.96	44.51	72.67	4.017	11.62	21.74	3.332	0.4626	3.51	0.2098	142.5	0.3987	0.3387	0.3933	97.51	34.22	130.2	2.255
2019	26.97	44.56	72.33	4.058	11.58	21.71	3.327	0.5268	3.294	0.2239	149.8	0.4177	0.337	0.3989	97.52	33.98	130.1	1.903
2020	27.02	45.02	72.25	3.919	11.56	21.35	3.278	0.5047	3.328	0.2056	147.9	0.3777	0.3353	0.3828	96.22	38.58	132.9	2.028
2021	26.81	44.56	72.3	3.999	11.56	21.43	3.292	0.4976	3.424	0.2189	147.7	0.2956	0.3403	0.3956	98.95	34.27	133.4	2.085
2022	26.64	43.97	72.71	4.019	11.64	21.53	3.308	0.4968	3.382	0.215	149.5	0.3341	0.3378	0.4049	101.34	32.99	136.1	2.021
2023	26.59	43.99	72.86	3.967	11.65	21.41	3.277	0.532	3.235	0.2215	147.7	0.5023	0.3413	0.4107	100.84	30.82	132.3	1.851
2024	26.89	44.33	71.56	3.947	11.45	21.05	3.243	0.5167	3.157	0.2208	162.8	0.4038	0.3373	0.3834	100.09	35.56	136.9	1.809
2025	27.9	45.52	71.39	3.958	11.42	21.81	3.345	0.4884	3.447	0.2212	161.8	0.3224	0.3363	0.3952	91.97	30	117.2	2.099
2026	26.23	43.85	72.84	3.965	11.65	21.64	3.317	0.4711	3.293	0.207	146.3	0.3792	0.3264	0.3717	104.23	33.83	141.4	2.063
2027	26.32	43.89	72.92	3.937	11.67	21.39	3.28	0.4627	3.346	0.1991	152.2	0.336	0.3361	0.387	102.09	37.11	140.4	2.151
2028	27.14	44.54	72.45	3.981	11.59	21.54	3.304	0.4782	3.365	0.221	141.6	0.4655	0.3401	0.3953	98.5	34.97	133.6	2.064
2029	26.6	44.3	72.49	3.92	11.59	21.36	3.278	0.4568	3.234	0.2165	147.8	0.3226	0.3272	0.3744	102.05	34.91	138.4	1.977
2030	26.3	43.69	72.58	3.878	11.61	21.34	3.274	0.5072	3.249	0.2123	150.8	0.2895	0.3272	0.3757	102.92	36.96	142	1.919
2031	27.79	45.48	71.61	3.941	11.45	21.66	3.328	0.4777	3.329	0.2206	158.2	0.3224	0.3291	0.3691	92.09	35.48	122.1	2.066
2032	26.85	44.45	72.3	3.924	11.57	21.09	3.236	0.4973	3.304	0.2119	150.9	0.2602	0.3321	0.3719	100.21	34.43	135.4	2.003
2033	26.02	43.36	73.24	3.885	11.73	21.15	3.244	0.4894	3.339	0.2056	137.1	0.3806	0.3352	0.4015	106.04	35.49	146.6	2.068
2034	27.22	44.9	72.28	3.969	11.57	21.59	3.311	0.4899	3.43	0.2159	149.6	0.3338	0.336	0.3973	96.07	34.94	128.5	2.14
2035	27.57	45.39	71.76	3.887	11.48	21.7	3.333	0.5037	3.362	0.227	156.1	0.3856	0.3318	0.3916	92.53	34.45	122.7	2.022
2037	27.23	45.41	72.07	3.927	11.53	21.71	3.327	0.5038	3.395	0.2208	161.8	0.4082	0.3355	0.3909	91.74	33.48	120.3	2.004
2038	26.82	45.02	72.01	4.025	11.52	21.41	3.281	0.5192	3.337	0.2199	164.6	0.2901	0.3332	0.3892	96.59	34.71	129.1	1.964
2039	26.79	44.74	72.46	3.93	11.59	21.01	3.224	0.5133	3.253	0.2092	149.3	0.3941	0.3335	0.3754	98	43.45	141.3	1.952
2040	27.03	44.36	71.64	3.821	11.47	21.09	3.234	0.4704	3.316	0.222	167.4	0.3465	0.3324	0.3927	101.12	33.18	134.8	2.028
2043	25.83	43.7	72.85	3.926	11.66	21.27	3.263	0.4635	3.277	0.2011	144.5	0.3501	0.3249	0.3759	102.84	35.62	141	2.03
2044	27.18	45.21	72.01	3.981	11.53	21.37	3.277	0.4947	3.27	0.2066	151.7	0.392	0.335	0.3798	95.27	39.33	131.7	1.993
2045	27.11	44.89	72.23	4.091	11.56	21.32	3.269	0.4672	3.352	0.2137	154	0.38	0.3394	0.3972	94.51	42.4	135	2.088
2046	26.9	44.74	72.47	3.977	11.59	21.77	3.334	0.4628	3.423	0.2111	150.1	0.3221	0.3328	0.3869	96.04	34.76	128.6	2.182
2048	26.09	43.61	73.11	3.946	11.69	21.6	3.317	0.4855	3.315	0.2014	144.4	0.405	0.3304	0.3918	102.23	34.36	139	2.051
2049	27.04	44.43	72.52	3.938	11.61	21.4	3.291	0.503	3.425	0.2094	152	0.3291	0.3358	0.4028	97.77	36.34	134	2.076
2050	26.85	44.74	72.39	4.045	11.57	21.63	3.319	0.474	3.413	0.1999	144.2	0.3392	0.3348	0.405	95	40.33	132.4	2.192
2051	27.23	45.3	72.32	4.063	11.57	21.77	3.333	0.4935	3.332	0.2195	150.8	0.357	0.3338	0.3952	93.15	37.11	126.1	1.985
2052	26.92	44.73	72.36	3.976	11.58	21.49	3.3	0.4897	3.343	0.2077	145.9	0.411	0.3366	0.397	96.83	37.24	132.5	2.044
2053	26.58	44	72.77	3.978	11.65	21.64	3.317	0.4988	3.296	0.2131	143.2	0.4262	0.3343	0.3929	101.52	32.83	135.2	1.964
2054	26.42	43.68	72.51	3.921	11.6	21.38	3.28	0.4722	3.268	0.215	146	0.3488	0.3245	0.3642	100.91	36.38	139.2	2.012
2055	27	44.5	72.41	3.867	11.58	21.41	3.283	0.5421	3.29	0.2188	156.2	0.3552	0.3385	0.4067	97.53	40.04	137.2	1.893
2056	26.27	43.94	72.66	4.053	11.62	21.45	3.292	0.4734	3.355	0.2122	147	0.3608	0.3323	0.394	101.78	36.24	139.7	2.109
2057	27.18	44.78	72.29	3.985	11.56	21.75	3.34	0.5053	3.479	0.2226	150.5	0.3031	0.3368	0.4025	95.5	30.83	123.5	2.077
2058	26.35	44.16	72.7	4.043	11.63	21.52	3.303	0.47	3.369	0.2107	146.4	0.3508	0.3344	0.3913	101.85	33.56	138	2.138
2059	26.59	44.25	72.6	3.912	11.61	21.17	3.248	0.5026	3.303	0.2033	139	0.3015	0.3367	0.3981	101.69	38.04	142	1.98
2060	26.17	44.02	73.03	3.944	11.68	21.38	3.283	0.454	3.361	0.2074	140.5	0.3078	0.3295	0.3782	101.75	38.99	143.4	2.149
2061	26.89	44.72	72.24	3.977	11.56	21.36	3.279	0.488	3.344	0.2171	152.7	0.3533	0.3346	0.385	97.6	39.1	135.8	2.042
2062	26.75	44.36	72.6	3.93	11.61	21.72	3.326	0.4845	3.418	0.212	138.6	0.3624	0.3299	0.3967	99.42	34.59	134.4	2.139
2063	27.43	45.04	71.85	3.976	11.49	21.58	3.312	0.4929	3.43	0.2153	160.6	0.344	0.3355	0.3929	95.49	34.33	126.7	2.106
2064	26.1	43.79	72.83	3.916	11.66	21.25	3.251	0.506	3.265	0.211	143.2	0.301	0.328	0.3823	101.32	37.13	140.1	1.98
2065	27.1	44.66	72.54	3.877	11.61	21.74	3.328	0.4998	3.486	0.2217	144.2	0.3096	0.3454	0.413	96.41	34.84	129.4	2.133
2066	26.48	44.27	72.75	3.974	11.63	21.53	3.301	0.519	3.311	0.2175	143.7	0.3888	0.3354	0.4025	102.25	34.54	139	1.943
2067	26.76	44.25	72.64	3.865	11.62	21.71	3.336	0.4787	3.355	0.2167	148.5	0.3502	0.3327	0.3835	101.15	31.29	133.5	2.024
2068	26.66	44.16	72.46	3.895	11.6	21.29	3.275	0.5025	3.265	0.2084	147.2	0.3965	0.3404	0.3844	100.13	33.95	135.1	1.96
2069	26.57	44.14	72.54	3.884	11.6	21.17	3.248	0.4854	3.393	0.2059	147	0.2892	0.3402	0.4031	101.14	34.57	137	2.115
2070	27.18	44.84	72.69	3.999	11.63	21.98	3.382	0.4839	3.493	0.2115	138.1	0.3662	0.3328	0.3977	97.01	32.13	126.5	2.189
2071	27.08	44.86	72.33	3.996	11.57	21.47	3.296	0.4969	3.326	0.2172	149.8	0.4247	0.3367	0.3938	94.69	37.78	128.9	1.983
2072	27.74	45.4	71.61	4.058	11.47	21.41	3.284	0.5104	3.441	0.2187	152.6	0.3358	0.3514	0.4226	91.81	39.93	127	2.053
2073	26.31	43.92	73.01	3.928	11.68	21.59	3.308	0.4777	3.339	0.2092	146.5	0.3581	0.3374	0.3996	100.36	35.87	136.9	2.057
2074	26.1	43.7	73.04	4.034	11.68	21.14	3.248	0.5008	3.366	0.2005	141.5	0.2539	0.3366	0.3912	101.61	41.88	146.1	2.078
2075	27.43	44.79	72.26	4.011	11.56	21.96	3.365	0.5256	3.409	0.227	146.5	0.4246	0.337	0.3976	95.23	30.48	122.2	1.972
2076	27.67	45.22	72.3	4.013	11.57	21.85	3.35	0.5499	3.43	0.2144	148.2	0.4317	0.3399	0.4369	95.32	31.04	124.5	1.996
2077	27.54	45.26	72.16	3.922	11.55	21.42	3.291	0.5047	3.336	0.2101	151.3	0.3512	0.3389	0.4038	94.1	42.37	133.4	2.018
2079	26.32	43.99	72.95	3.935	11.67	21.28	3.26	0.4752	3.36	0.1995	139.5	0.3187	0.3379	0.3896	103.2	34.64	141	2.166
2080	25.95	43.66	73.21	4.063	11.71	21.61	3.309	0.4542	3.403	0.1989	137	0.3418	0.3249	0.3864	102.18	36.6	141.3	2.229
2081	26.36	43.79	73.03	3.813	11.68	21.38	3.289	0.5219	3.33	0.2129	141	0.3792	0.3316	0.3909	104.88	31.6	140.6	1.94
2082	26.94	44.77	72.37	4.078	11.58	21.55	3.302	0.4783	3.376	0.2034	147.4	0.3467	0.3362	0.399	96.99	37.6	133	2.18
2083	25.71	43.28	73.44	3.878	11.74	21.56	3.309	0.4721	3.367	0.1984	143.4	0.31	0.3392	0.394	106.11	34.22	145.3	2.124
2084	26.25	44.03	73.12	3.941	11.69	21.62	3.316	0.4603	3.417	0.2091	146.3	0.3188	0.3368	0.3955	101.02	33.67	135.8	2.18
2085	27.37	45.45	71.89	4.064	11.51	21.66	3.321	0.4951	3.331	0.22	145.9	0.4069	0.3418	0.3986	92.61	36.73	125.4	2.013
2086	26.58	44.32	72.71	3.865	11.63	21.51	3.303	0.4811	3.347	0.2041	142.8	0.3589	0.3304	0.384	100.36	35.42	136.5	2.078
2087	26.8	44.67	72.15	3.906	11.54	21.06	3.229	0.4959	3.189	0.2029	148.5	0.4205	0.3291	0.3744	98.41	40.9	138.8	1.91
2088	26.4	44.06	72.72	3.899	11.63	21.55	3.306	0.5063	3.336	0.2155	148.8	0.3828	0.3293	0.3914	99.65	36.56	136.1	1.976
2089	27.54	45.2	71.51	3.834	11.45	21.35	3.281	0.477	3.307	0.2151	151.3	0.4285	0.3407	0.4162	96.33	34.87	129.5	2.034
2090	26.73	44.44	72.71	3.987	11.63	21.5	3.297	0.5453	3.298	0.2102	145.2	0.4558	0.3403	0.3978	97.96	38.61	136.8	1.899
2092	26.83	44.62	72.34	3.929	11.57	21.48	3.296	0.4701	3.35	0.2024	142.8	0.3176	0.3346	0.3937	96.48	40	135.4	2.161
2093	27.45	44.66	72	3.939	11.53	21.35	3.279	0.5446	3.345	0.2183	160.9	0.4596	0.3354	0.3942	98.33	37.17	134.9	1.954
2095	27.27	44.3	71.88	3.853	11.51	21.25	3.267	0.4948	3.314	0.2208	177.8	0.3041	0.3359	0.3917	99.12	35.96	135	1.959
2096	27.43	45.12	71.95	3.913	11.51	21.54	3.303	0.493	3.339	0.2203	153.2	0.3627	0.3324	0.3932	93.15	40.22	130.1	1.986
2097	27.31	45.26	72.11	3.994	11.54	21.57	3.313	0.5065	3.357	0.2122	148.7	0.4175	0.3351	0.4011	94.6	33.82	125	2.014
2098	27.33	44.97	72.38	3.917	11.58	21.72	3.33	0.5052	3.355	0.2122	151.6	0.4636	0.3342	0.3877	93.89	36.66	127.5	2.019
2099	26.87	44.5	72.41	4.027	11.59	21.68	3.328	0.4944	3.483	0.2107	143.3	0.3117	0.3343	0.4089	98.15	33.38	131	2.182
2100	27.53	45.37	72.16	3.942	11.54	21.85	3.348	0.5262	3.358	0.2257	154.6	0.445	0.3424	0.4098	92.95	35.04	124.3	1.96
2101	26.42	44.04	72.63	3.938	11.62	21.47	3.295	0.4984	3.281	0.2119	150.5	0.391	0.3327	0.3875	99.75	39.86	140.1	1.99
2102	28.41	46.05	71.01	3.681	11.36	20.81	3.202	0.4908	3.452	0.2198	154.6	0.4077	0.336	0.4185	97.75	35.06	131.2	2.082
2103	26.92	44.38	72.7	3.918	11.64	21.64	3.327	0.503	3.472	0.2165	148.1	0.3387	0.3351	0.4046	100.17	35.28	136.9	2.136
2104	27.31	44.83	71.42	3.93	11.43	21.34	3.275	0.4967	3.245	0.23	162.7	0.3351	0.3336	0.3735	97.55	35.16	131.9	1.887
2105	26.67	44.65	72.44	4.013	11.59	21.26	3.256	0.4671	3.353	0.2116	146.7	0.3088	0.3334	0.3677	97.48	43.05	140.5	2.1
2108	26.55	44.09	72.82	3.879	11.65	21.34	3.277	0.4707	3.323	0.2096	146	0.3238	0.3362	0.3899	102.05	37.12	142.6	2.044
2109	26.95	44.61	71.97	3.931	11.52	21.59	3.308	0.5107	3.368	0.2151	154	0.3243	0.3385	0.3929	99.27	34.24	133.5	2.008
2110	26.16	43.41	73.09	3.821	11.69	21.23	3.266	0.5149	3.237	0.2072	151.9	0.3927	0.3384	0.383	103.28	43.22	150.5	1.893
2111	26.58	43.96	72.81	3.959	11.64	21.25	3.262	0.5189	3.267	0.2134	153.8	0.447	0.339	0.4032	101.38	38.52	142.2	1.954
2112	26.91	44.61	72.46	3.869	11.59	21.43	3.293	0.4749	3.358	0.2092	150.1	0.3437	0.3301	0.3754	96.67	40.24	135.2	2.11
2113	26.38	43.84	73.13	3.887	11.69	21.21	3.265	0.4668	3.349	0.2028	141.6	0.421	0.343	0.3753	105	39.42	148.9	2.117
2114	26.77	44.59	72.58	3.922	11.61	21.29	3.267	0.4838	3.216	0.2112	140.4	0.4586	0.3356	0.376	97.98	42.78	140.8	1.948
2115	27.37	44.8	71.71	3.87	11.47	21.2	3.257	0.4992	3.209	0.2147	156.9	0.3356	0.332	0.3674	95.12	42.62	135.7	1.93
2116	26.23	44	72.77	3.942	11.65	20.99	3.227	0.4642	3.183	0.2079	141.7	0.4006	0.3377	0.3692	102.82	41.09	146.9	1.958
2117	28.06	45.46	71.04	3.693	11.37	21.93	3.361	0.5182	3.317	0.2088	153.8	0.3356	0.3327	0.412	92.36	34.81	122.6	1.965
2119	27.27	44.72	71.92	3.916	11.5	21.41	3.286	0.4868	3.32	0.2151	160.6	0.3243	0.3341	0.396	98.62	30.81	128.4	2.04
2120	27.16	45.07	72.25	3.993	11.57	21.61	3.31	0.4994	3.339	0.2218	154.3	0.3894	0.339	0.3949	93.72	37.79	128	1.98
3001	26.52	44.4	72.77	3.814	11.63	21.34	3.27	0.4615	3.399	0.2119	152.3	0.3376	0.3405	0.3877	99.63	36.83	137.3	2.163
3002	26.63	44.32	72.74	3.727	11.64	21.71	3.322	0.5034	3.315	0.2178	143	0.3714	0.3356	0.4087	100.52	31.04	131.9	1.941
3003	26.79	44.82	72.34	3.875	11.58	21.6	3.302	0.476	3.417	0.2055	148.2	0.3322	0.3404	0.4078	95.19	36.61	128.8	2.184
3011	26.91	44.61	72.6	3.712	11.62	21.55	3.306	0.4933	3.406	0.2174	154.7	0.3394	0.3361	0.4067	96.86	36.43	131.9	2.073
3012	26.73	44.35	72.36	3.973	11.58	21.37	3.277	0.4598	3.375	0.2133	140.4	0.4187	0.3384	0.4002	98.35	37.75	135.6	2.158
3021	26.71	44.4	72.58	3.874	11.62	21.21	3.259	0.4786	3.288	0.2062	138.8	0.4327	0.3424	0.395	100.67	36.43	138.3	2.071
3022	27.3	44.93	72.27	4.003	11.56	21.9	3.359	0.4765	3.408	0.2093	142.2	0.4153	0.332	0.3879	94.69	31.57	123.3	2.113
3031	26.86	44.45	72.73	3.957	11.64	21.86	3.347	0.4969	3.432	0.2015	140.7	0.3315	0.3348	0.4006	97.97	31.93	129.3	2.173
3032	26.68	44.26	72.29	3.955	11.57	21.5	3.294	0.4947	3.407	0.2086	145.1	0.3421	0.3294	0.3896	104.32	37.66	145.8	2.119
3033	26.69	44.38	72.54	3.962	11.61	21.44	3.29	0.4762	3.388	0.2093	140.2	0.364	0.327	0.3969	97.61	40.49	137.2	2.137
3041	26.49	43.96	72.59	3.795	11.62	21.01	3.221	0.4748	3.163	0.2072	149.6	0.366	0.3254	0.3755	99.71	50.32	151	1.897
3042	26.53	44.38	73.01	3.745	11.68	21.04	3.225	0.4432	3.231	0.195	135.5	0.4043	0.3304	0.3655	100.31	40.6	142.3	2.121
3051	26.71	44.47	72.6	4.012	11.62	21.5	3.3	0.498	3.341	0.2045	143.6	0.3868	0.338	0.4059	98.49	36.72	134.8	2.066
3052	26.45	43.89	72.73	4.014	11.63	21.47	3.291	0.4934	3.335	0.216	146.9	0.3276	0.3353	0.399	100.46	35.56	136.9	2.02
3053	25.98	43.49	73.07	3.998	11.68	21.37	3.279	0.4902	3.45	0.2016	145.1	0.3389	0.3237	0.3861	102.88	41.81	147.7	2.179
3061	26.86	44.59	72.57	4.002	11.61	21.64	3.32	0.4844	3.454	0.2003	146	0.3197	0.3248	0.3768	100.68	41.23	143.6	2.199
3062	26.62	44.42	72.51	3.902	11.61	21.57	3.3	0.4632	3.404	0.2043	142.4	0.3303	0.3406	0.3853	97.92	36	132.6	2.203
3071	26.93	44.32	72.55	3.913	11.6	21.73	3.329	0.5416	3.509	0.2211	153.1	0.3977	0.3344	0.4142	97.56	32.14	128.6	2.019
3072	26.98	44.55	72.3	3.977	11.56	21.66	3.326	0.5129	3.479	0.204	154.6	0.2718	0.3349	0.4105	97.21	34.98	130.7	2.132
3073	26.64	44.2	72.78	3.74	11.64	21.32	3.271	0.5174	3.397	0.205	153.6	0.3559	0.3415	0.4391	98.91	38.13	136.1	2.077
3081	26.9	44.46	72.47	3.992	11.6	21.68	3.33	0.4905	3.411	0.2053	144.1	0.3136	0.3309	0.3906	97.58	34.08	129.7	2.162
3082	26.72	44.44	72.47	3.758	11.6	21.42	3.284	0.5128	3.363	0.2214	152.2	0.3731	0.3353	0.3917	98.49	34.21	132	1.947
3091	26.87	44.7	72.36	3.921	11.57	21.48	3.304	0.4821	3.37	0.2094	144.5	0.3663	0.3368	0.3849	96.59	36.77	131.7	2.105
3092	26.42	43.87	72.98	4.023	11.67	21.9	3.357	0.4693	3.478	0.2068	140	0.3585	0.338	0.4113	99.65	34.29	135.2	2.243
3093	26.49	44.38	72.67	4.046	11.63	21.42	3.29	0.4702	3.408	0.2047	144.9	0.3109	0.3309	0.3792	100.19	37.99	140.6	2.191
3101	27.16	44.53	72.51	4.092	11.6	21.91	3.368	0.4906	3.343	0.215	147.1	0.344	0.3198	0.3807	96.81	33.8	128.9	2.053
3102	27.23	44.45	72.32	3.981	11.58	21.69	3.32	0.5537	3.392	0.2139	147.9	0.3495	0.3343	0.4328	96.08	33.88	127	1.944
3111	26.66	44.22	72.56	3.975	11.61	21.42	3.292	0.4909	3.331	0.1942	153.6	0.3292	0.3338	0.3872	98.68	39.24	138.2	2.116
3112	26.4	43.91	72.78	3.84	11.65	21.22	3.255	0.516	3.241	0.2139	158.1	0.3532	0.3282	0.3809	102.89	39.65	145.7	1.923
3113	26.5	44.23	72.59	3.862	11.61	21.38	3.281	0.4658	3.262	0.2075	149.5	0.3513	0.3258	0.3798	100.37	37.66	139.3	2.047
3121	26.7	44.39	72.63	3.786	11.63	21.3	3.266	0.4982	3.339	0.1982	155.2	0.3108	0.3346	0.3878	98.83	38.75	137.2	2.075
3131	26.41	44.17	72.71	3.903	11.64	21.4	3.288	0.4667	3.317	0.2128	150.5	0.45	0.331	0.3964	100.9	37.67	140.1	2.086
3132	27.35	44.71	72.11	3.978	11.53	21.53	3.308	0.4637	3.338	0.2162	141.9	0.3119	0.3385	0.3921	96.69	31.62	126.7	2.099
3133	26.63	44.23	72.5	3.857	11.6	21.41	3.282	0.5084	3.315	0.2012	147.1	0.4203	0.3321	0.3747	100.88	36.94	140	2.026
3141	27.38	44.97	71.89	3.942	11.5	21.42	3.288	0.516	3.327	0.2208	148.6	0.413	0.3463	0.4062	97.04	33.04	128.5	1.938
3142	26.72	44.47	72.46	4.059	11.59	21.59	3.316	0.4743	3.288	0.2073	146.6	0.3823	0.3329	0.3907	98.73	35.33	133.7	2.02
3151	27.34	44.46	72.34	3.946	11.58	21.7	3.332	0.4767	3.336	0.2211	146.7	0.3735	0.334	0.4205	95.38	32.94	125.5	2.032
3152	26.73	44.05	72.57	3.848	11.61	21.37	3.275	0.4927	3.313	0.2062	146.3	0.3089	0.333	0.383	96.74	48.83	144.2	2.031
3153	26.63	44.46	72.4	3.815	11.58	21.38	3.284	0.4477	3.251	0.2222	147	0.3409	0.3304	0.3762	96.64	41.59	137.4	1.974
3161	26.3	44.23	72.68	3.95	11.63	21.42	3.281	0.4987	3.235	0.2086	149.4	0.4066	0.3341	0.3819	98.38	36.86	135.1	1.969
3162	26.98	44.48	72.35	3.899	11.58	21.43	3.285	0.4892	3.432	0.2114	153.9	0.2898	0.3376	0.4121	98.72	34.44	132	2.113
3171	27.21	45.15	72.01	3.914	11.52	21.43	3.289	0.4874	3.341	0.2049	147.9	0.4248	0.3364	0.398	96.33	33.63	128.1	2.057
3172	27.28	44.95	72.1	3.984	11.53	21.49	3.294	0.4876	3.321	0.221	152	0.3478	0.3312	0.3777	95.28	38.4	130.8	2.013
3181	26.84	44.52	72.64	3.86	11.62	21.27	3.265	0.4416	3.313	0.1985	148.5	0.3485	0.3309	0.3864	98.34	39.27	138.2	2.217
3182	26.75	44.3	72.56	3.902	11.6	21.52	3.297	0.499	3.282	0.2167	151.8	0.4234	0.3372	0.41	98.45	34.75	133.2	1.969
3191	26.07	43.52	73.06	4.048	11.68	21.58	3.313	0.4706	3.352	0.198	144.3	0.263	0.3298	0.3787	102.62	37.48	143.6	2.188
3192	26.47	44.22	72.71	3.945	11.63	21.26	3.263	0.4609	3.335	0.212	154.6	0.2802	0.3342	0.3639	100.56	40.93	142.3	2.11
3193	27.09	44.99	72.25	4.036	11.56	21.46	3.295	0.469	3.381	0.2203	155.8	0.2702	0.3413	0.3873	98.21	32.84	129.8	2.108
3201	26.97	44.9	72.39	4.085	11.58	21.61	3.317	0.5134	3.339	0.218	155.7	0.2981	0.3357	0.3936	96.44	35.12	129.1	1.975
3202	26.32	44.36	72.6	3.997	11.61	21.24	3.26	0.4899	3.319	0.2066	144.9	0.3192	0.3345	0.386	100.79	38.04	140.4	2.046
3211	26.96	44.64	72.37	3.964	11.58	21.3	3.269	0.4902	3.347	0.208	153.6	0.3226	0.3302	0.3844	98.62	36.34	134.9	2.083
3221	27.04	44.5	72.25	3.886	11.56	21.44	3.297	0.5385	3.288	0.2165	148.3	0.4135	0.3367	0.3832	98	35.66	133.4	1.883
3222	26.78	44.53	72.24	3.929	11.55	21.19	3.256	0.4771	3.326	0.217	144.6	0.3377	0.3386	0.3825	98.86	37.95	137.7	2.03
3231	26.63	44.16	72.44	3.837	11.6	21.41	3.287	0.5035	3.305	0.2193	156	0.3312	0.3373	0.3759	99.36	36.91	136.8	1.946
3232	27.29	44.8	72.02	3.925	11.52	21.53	3.312	0.5269	3.485	0.2236	156.9	0.3608	0.3392	0.3997	97.04	33.37	129	2.039
3241	27.14	44.78	72.19	4.038	11.55	21.56	3.31	0.4993	3.374	0.2202	151.5	0.418	0.3384	0.3799	97.24	34.2	130.1	2.006
3242	27.52	45.06	71.94	3.786	11.51	21.39	3.29	0.5156	3.386	0.2166	154.3	0.3545	0.3385	0.4135	96.97	33.62	129.1	2.004
3252	26.8	44.31	72.22	4.067	11.55	21.51	3.3	0.5173	3.369	0.2185	148.2	0.3922	0.3357	0.4039	99.62	33.47	134.1	1.966
3253	27.55	45.31	72.01	4.096	11.53	21.82	3.349	0.5041	3.523	0.2146	153.4	0.3378	0.3334	0.3791	94.48	30.51	121.5	2.202
3261	26.64	44.26	72.54	3.965	11.6	21.51	3.303	0.5022	3.413	0.2151	148.9	0.3274	0.3373	0.3973	99.98	34.12	135.4	2.075
3262	27.84	45	71.53	3.9	11.44	21.52	3.308	0.5007	3.437	0.2285	159.9	0.3358	0.3402	0.4034	93.8	35.09	125.3	2.059
3271	26.67	44.41	72.43	3.946	11.59	21.43	3.287	0.4811	3.391	0.2058	145.7	0.3596	0.3334	0.3684	99.47	38.44	138.2	2.158
3272	27.25	44.74	72.15	3.991	11.54	21.39	3.28	0.4802	3.492	0.2182	147	0.3307	0.3342	0.3802	95.95	37.71	131.9	2.159
3281	27.74	45.53	71.78	4.163	11.48	22.05	3.386	0.5138	3.535	0.2264	154	0.3477	0.3391	0.4021	92.75	30.13	117.5	2.124
3282	27.2	44.7	72.04	3.996	11.53	21.41	3.284	0.5201	3.244	0.2139	153.6	0.3146	0.3373	0.3825	98.99	36	134.8	1.863
3291	27.61	45.09	72.01	3.926	11.52	21.72	3.336	0.4951	3.43	0.2154	146.9	0.4296	0.3397	0.4102	94.76	32.6	123.5	2.11
3292	26.8	44.39	72.32	3.733	11.58	21.32	3.266	0.5078	3.279	0.2051	143.7	0.3064	0.3359	0.3821	97.71	36.44	133.8	1.977
3301	26.8	44.39	72.52	3.882	11.6	21.32	3.279	0.4766	3.371	0.2071	150.5	0.2979	0.3453	0.3964	97.45	39.52	135.9	2.12
3302	26.22	43.93	72.8	3.769	11.65	21.22	3.262	0.469	3.267	0.211	153	0.3183	0.3393	0.3833	101.42	41.52	145.7	2.042
3311	26.49	44.33	72.62	3.988	11.62	21.64	3.313	0.4826	3.349	0.2008	143.1	0.4609	0.3345	0.3789	98.21	33.45	130.8	2.119
3312	25.99	43.38	73.18	3.885	11.7	21.51	3.301	0.4975	3.269	0.2021	140.7	0.4889	0.3367	0.4021	104.03	37.34	146.1	1.995
3313	27.28	44.59	71.72	3.951	11.48	21.53	3.303	0.5423	3.301	0.2227	157.7	0.3592	0.3306	0.4095	97.43	33.35	129.2	1.817
3321	26.7	44.21	72.67	3.855	11.63	21.45	3.291	0.4971	3.34	0.2116	151	0.3487	0.3364	0.393	100.23	34.51	136.2	2.027
3322	26.69	44.63	72.34	3.822	11.57	21.24	3.263	0.5076	3.344	0.2072	145.1	0.3093	0.3353	0.3882	98.08	40.2	137.8	2.025
3331	27.03	44.77	72.11	3.727	11.54	21.32	3.271	0.4939	3.157	0.2089	149.1	0.3579	0.3355	0.3921	96.02	35.96	129.2	1.877
3332	26.81	44.41	72.36	3.858	11.58	21.24	3.261	0.4919	3.218	0.1984	147.3	0.3362	0.3285	0.3748	98.76	37.76	136.8	1.967
3333	26.61	44.02	72.77	3.598	11.65	21.24	3.26	0.4956	3.262	0.2002	150.3	0.2982	0.3325	0.3867	101.16	36.11	139.1	1.99
3341	26.93	44.25	72.33	3.78	11.57	21.17	3.247	0.4836	3.211	0.2084	146.3	0.3459	0.3341	0.3821	99.48	36.33	137.4	1.936
3342	26.9	44.57	71.96	3.863	11.51	21.61	3.307	0.6204	3.293	0.2177	154.7	0.3972	0.3379	0.4187	96.46	35.3	129.7	1.83
3351	27.15	44.68	72.22	3.946	11.56	21.54	3.307	0.487	3.421	0.217	156.6	0.3925	0.3356	0.3969	96.55	35.12	130.4	2.098
3352	26.66	44.36	72.53	3.817	11.6	21.23	3.26	0.463	3.28	0.2102	146.4	0.3771	0.3445	0.3918	101.54	37.69	141.3	2.035
3361	26.61	44.09	72.64	3.795	11.63	21.36	3.272	0.4553	3.343	0.21	151.5	0.3322	0.3335	0.395	98.11	40.31	138.2	2.108
3371	27.05	44.69	72.37	3.758	11.57	21.63	3.307	0.5148	3.378	0.2178	148.1	0.3472	0.3298	0.3985	99.87	31.28	131.5	2.009
3372	26.55	43.88	72.94	3.771	11.67	21.44	3.287	0.4911	3.334	0.2095	147.3	0.305	0.33	0.3858	99.23	36.21	135.9	2.058
3373	27.05	44.47	71.86	3.774	11.49	21.32	3.271	0.4932	3.257	0.2189	163	0.3283	0.3312	0.3767	97.53	36.45	132.5	1.94
3381	28.07	45.33	70.97	3.715	11.36	20.99	3.217	0.5362	3.324	0.2103	150.7	0.321	0.3346	0.387	94.84	34.68	126.6	1.942
3382	26.59	43.96	72.51	3.79	11.61	21	3.213	0.4697	3.206	0.1957	141.7	0.3188	0.3247	0.3684	100.36	52.86	154.4	2.022
3392	26.55	44.29	72.7	3.887	11.62	21.48	3.292	0.4644	3.375	0.2038	140.4	0.2806	0.3415	0.3839	99.87	37.22	137.4	2.169
3393	26.5	44.25	72.85	3.741	11.65	21.1	3.237	0.4962	3.157	0.2075	147.3	0.3244	0.3345	0.3711	102.24	37.69	142.5	1.895
3401	26.75	44.43	72.56	4.062	11.61	21.6	3.315	0.5067	3.451	0.2094	155.7	0.3534	0.3377	0.4189	98.3	38.04	136	2.104
3402	27.67	44.81	71.7	4.03	11.47	21.61	3.321	0.5258	3.395	0.2305	162.8	0.3882	0.3463	0.4147	94.76	35.42	126.8	1.945
3411	26.83	44.66	72.16	3.97	11.54	21.29	3.269	0.4759	3.307	0.1964	144.9	0.4	0.3368	0.38	98.23	42.44	141.3	2.127
3412	27.49	45.08	72.06	4.046	11.53	21.59	3.311	0.4855	3.516	0.2124	146.6	0.3699	0.3373	0.3849	96.84	32.79	127.8	2.201
3413	26.17	43.77	72.85	3.795	11.66	20.85	3.202	0.4853	3.313	0.2013	157.5	0.3091	0.3416	0.4007	101.8	47.88	152.6	2.049
3421	26.72	44.82	72.2	4.145	11.56	21.43	3.289	0.4659	3.443	0.2128	150.3	0.3395	0.344	0.4002	96.59	40.46	135.6	2.176
3422	26.9	44.73	72.3	3.997	11.57	21.29	3.271	0.5186	3.481	0.2127	152.7	0.3349	0.3418	0.3881	97.18	38.52	134.3	2.099
3431	26.98	44.65	72.49	4.136	11.6	21.74	3.337	0.4745	3.554	0.2025	145.3	0.3328	0.3319	0.3913	95.82	35.25	129.5	2.322
3432	27.32	45.12	71.99	3.777	11.52	21.2	3.259	0.4992	3.313	0.2162	160.3	0.3945	0.3349	0.4123	97.89	35.1	132.1	1.992
3433	27.06	44.94	72.11	4.043	11.53	21.38	3.283	0.4989	3.325	0.2023	143.9	0.4416	0.3371	0.3774	97.26	38.84	134.5	2.027
3441	26.4	44.34	72.77	3.995	11.64	21.39	3.283	0.4922	3.397	0.2066	154.6	0.3874	0.3407	0.4249	100.11	37.51	139.4	2.129
3442	26.89	45.11	72.21	4.088	11.55	21.42	3.291	0.4542	3.34	0.2143	148.2	0.4369	0.3373	0.3803	99.77	35.1	135.7	2.152
3451	26.69	44.39	72.45	3.907	11.59	21.34	3.277	0.4931	3.304	0.2091	147.6	0.4246	0.3365	0.3968	99.23	36.37	136.6	1.987
3452	27.3	44.94	72.18	4.031	11.55	21.53	3.307	0.4497	3.416	0.2218	152.2	0.3792	0.3289	0.3874	97.68	33.22	130.2	2.179
3461	27.31	45.23	72.04	4.024	11.53	21.42	3.292	0.4776	3.318	0.212	139.2	0.4903	0.3255	0.3744	95.55	33.42	126.4	2.044
3462	27.29	45.25	72.02	4.207	11.52	21.65	3.319	0.4682	3.452	0.2097	139.2	0.3941	0.3347	0.3981	94.52	34.36	125.4	2.239
3471	26.65	44.26	72.54	3.883	11.61	21.38	3.283	0.4611	3.338	0.2016	144.1	0.3563	0.3294	0.381	99.7	41.75	142.1	2.153
3472	27.23	45.05	71.85	4.063	11.5	21.17	3.252	0.5083	3.266	0.2124	160	0.3657	0.3389	0.3889	98.29	35.94	133.6	1.94
3473	27.1	44.94	72.3	3.951	11.57	21.13	3.245	0.4549	3.385	0.2126	150.6	0.3512	0.3401	0.389	95.55	38.26	131.4	2.151
3481	27.08	44.69	72.07	4.048	11.53	21.65	3.327	0.4824	3.37	0.2078	157.7	0.3123	0.3318	0.3945	97.1	32.35	128.2	2.12
3482	26.72	44.16	72.21	3.794	11.56	21.12	3.242	0.5329	3.265	0.211	147.4	0.3419	0.3291	0.3898	97.66	43.02	139.6	1.871
3491	27.04	44.76	72.15	4.026	11.54	21.53	3.306	0.4968	3.396	0.2138	151.9	0.3297	0.3366	0.3899	96.85	35.58	129.5	2.065
3492	27.2	44.81	71.99	4.295	11.52	21.81	3.341	0.507	3.397	0.2227	145.6	0.3422	0.3325	0.4015	96.38	31.75	126.3	2.013
3493	27.2	45.14	72.03	4.247	11.53	21.77	3.347	0.4603	3.393	0.2057	145.6	0.3514	0.3352	0.3843	95.75	32.65	126.4	2.192
4002	26.96	44.59	72.25	3.975	11.56	21.39	3.28	0.504	3.417	0.2086	147.2	0.3049	0.3394	0.3882	97	36.19	131.8	2.082
4003	26.88	44.54	72.42	3.954	11.59	21.53	3.304	0.5083	3.383	0.2136	150.3	0.3447	0.3405	0.4068	97.42	34.58	130.7	2.092
4004	27.11	44.63	72.24	3.964	11.56	21.6	3.315	0.5084	3.397	0.2176	149.6	0.3682	0.3346	0.3986	96.64	34.36	129.2	2.012
4006	26.68	44.46	72.28	3.948	11.56	21.37	3.281	0.4717	3.253	0.214	151.3	0.3133	0.3259	0.3669	99.24	38	137.4	2.033
4007	27.1	44.56	72.25	3.943	11.56	21.49	3.299	0.5039	3.391	0.2172	146.7	0.362	0.3412	0.4138	97.19	34.65	130.3	2.052
4009	27.07	44.71	72.32	3.862	11.57	21.57	3.308	0.4822	3.409	0.2088	147.4	0.3603	0.3339	0.3891	96.97	34.41	129.9	2.118
4012	26.54	44.05	72.66	3.833	11.62	21.1	3.239	0.4827	3.319	0.2097	151.5	0.3325	0.3309	0.3905	99.04	42.76	143.2	2.043
4014	27.2	44.53	72.15	3.948	11.54	21.5	3.296	0.5136	3.369	0.2204	148.2	0.3843	0.3405	0.3949	97.91	34.53	131.2	2.004
4015	27.12	44.77	72.12	3.905	11.54	21.52	3.302	0.535	3.381	0.2172	159.6	0.3195	0.3389	0.4061	96.44	35.17	129.5	1.973
4017	26.43	44.18	72.79	3.811	11.65	21.18	3.255	0.4728	3.253	0.2026	151.5	0.3733	0.3255	0.369	100.3	41.9	144.4	2.076
4018	26.83	44.44	72.41	3.897	11.58	21.44	3.287	0.5027	3.342	0.2144	153.2	0.3581	0.3314	0.3876	99.5	37.19	137.5	1.984
4024	26.96	44.57	72.37	3.988	11.58	21.6	3.316	0.4897	3.397	0.2137	143.1	0.2997	0.3309	0.3851	97.38	35.27	131.4	2.104
4025	26.76	44.52	72.42	3.915	11.59	21.41	3.284	0.4757	3.384	0.2168	145	0.3391	0.3342	0.385	97.64	38.84	135.7	2.09
4029	26.97	44.66	72.27	3.927	11.57	21.52	3.302	0.4897	3.378	0.2115	145.9	0.3655	0.3334	0.3939	96.94	34.34	129.6	2.049
4031	26.6	44.16	72.6	3.927	11.61	21.43	3.29	0.493	3.287	0.2141	153.6	0.3966	0.3345	0.3956	99.29	39.57	139.3	2.035
4032	26.65	44.28	72.48	3.851	11.59	21.26	3.266	0.4801	3.317	0.2086	150.7	0.3836	0.3379	0.3888	98.8	40.67	140	2.041
4033	26.48	44.19	72.66	3.869	11.62	21.26	3.261	0.4762	3.313	0.2032	144.6	0.3122	0.3325	0.3778	99.93	43.13	144.9	2.078
4034	26.79	44.6	72.54	3.934	11.61	21.6	3.311	0.4916	3.358	0.2194	146	0.3663	0.3356	0.4019	97.9	34.82	131.8	2.046
4035	26.61	44.47	72.56	3.9	11.61	21.31	3.27	0.4677	3.347	0.2061	151.1	0.3057	0.3331	0.3904	99.3	41.74	142.1	2.116
4037	27.12	44.67	72.09	3.948	11.53	21.4	3.285	0.5111	3.365	0.2206	155.8	0.3509	0.3364	0.3957	97.79	38.02	134.3	1.974
4039	26.73	44.43	72.39	3.841	11.58	21.22	3.26	0.481	3.282	0.2092	152.4	0.3303	0.3342	0.3778	99.58	41.39	141.9	1.978
4040	26.73	44.26	72.51	3.911	11.6	21.35	3.276	0.5102	3.353	0.2109	148.1	0.361	0.3379	0.3954	100.14	37.06	138.6	2.053
4042	26.56	44.51	72.64	3.913	11.63	21.37	3.284	0.4709	3.337	0.2027	151.5	0.2862	0.3344	0.3822	100.27	40.66	142.2	2.167
4043	27.23	44.74	72.28	3.982	11.57	21.75	3.335	0.5026	3.371	0.2076	145.7	0.3902	0.3343	0.3985	96.08	31.49	125	2.108
4045	26.81	44.93	72.34	3.814	11.57	21.39	3.282	0.4775	3.341	0.2116	148	0.3444	0.3308	0.3841	97.96	36.85	134.2	2.089
4046	26.81	44.57	72.4	3.941	11.58	21.37	3.28	0.4942	3.329	0.2143	146.5	0.4217	0.3392	0.3968	98.71	37.88	136.2	2.028
4047	27.2	44.86	72.18	4.024	11.55	21.58	3.308	0.5063	3.422	0.2146	144.9	0.3254	0.3363	0.3935	96.97	33.39	128.7	2.071
4048	26.85	44.51	72.38	3.927	11.58	21.41	3.287	0.4984	3.351	0.2116	152.7	0.3485	0.3347	0.3995	98.75	36.65	135.4	2.022
4053	26.91	44.65	72.46	4.05	11.59	21.74	3.333	0.4981	3.421	0.2137	146.2	0.3454	0.3346	0.4024	96.58	33.69	128.1	2.152
4054	26.82	44.42	72.37	3.882	11.58	21.24	3.26	0.4992	3.313	0.2034	146.3	0.3062	0.3267	0.3672	99.8	39.01	140	2.02
4055	27.07	44.68	72.2	4.08	11.55	21.67	3.327	0.506	3.439	0.2226	152.7	0.3712	0.3368	0.3958	97.89	33.65	130.9	2.085
4056	26.64	44.11	72.59	4	11.62	21.41	3.286	0.4943	3.411	0.2199	155.6	0.3797	0.3334	0.4144	99.96	37.94	138.9	2.091
4057	27.17	44.82	72.39	3.887	11.58	21.59	3.314	0.4753	3.404	0.2096	143.5	0.3302	0.3338	0.3887	97.14	34.6	130.5	2.156
4060	26.81	44.61	72.36	3.905	11.58	21.46	3.295	0.5046	3.379	0.2088	148.9	0.3646	0.3344	0.3886	98.5	35.59	133.7	2.043
4064	26.58	44.37	72.52	3.91	11.61	21.29	3.269	0.4735	3.293	0.2085	147.5	0.337	0.3328	0.3808	99.47	38.83	139.2	2.05
4065	26.85	44.56	72.37	3.953	11.58	21.43	3.286	0.4876	3.338	0.2031	152.9	0.3112	0.3352	0.3971	98.01	36.49	133.9	2.074
4067	26.94	44.69	72.26	3.905	11.56	21.41	3.285	0.4791	3.333	0.2034	145	0.3662	0.3363	0.3885	97.69	35.44	132.3	2.103
4068	26.69	44.39	72.52	3.846	11.6	21.5	3.297	0.4664	3.395	0.2063	147.1	0.3221	0.328	0.3739	98.03	38.21	135.7	2.214
4069	27.08	44.61	72.16	3.874	11.55	21.24	3.263	0.4782	3.311	0.2117	152.1	0.3466	0.3346	0.3837	98.53	39.36	138.2	2.005
4071	26.92	44.71	72.29	3.937	11.57	21.36	3.282	0.4865	3.343	0.2116	148.8	0.3286	0.3377	0.3973	97.38	35.17	131.3	2.051
4072	26.63	44.33	72.44	3.961	11.59	21.38	3.284	0.5135	3.325	0.206	150.4	0.2982	0.3349	0.402	99.7	35.68	136	2.002
4073	27.04	44.67	72.17	3.975	11.55	21.41	3.284	0.4921	3.361	0.2144	153.7	0.3413	0.334	0.391	98.1	35.51	132.7	2.029
4074	27	44.55	72.3	3.968	11.57	21.51	3.304	0.4855	3.359	0.2151	149.8	0.3517	0.3323	0.4018	97.82	34.91	131.8	2.013
4075	27.07	44.52	72.48	3.951	11.6	21.6	3.311	0.491	3.406	0.2118	151.1	0.3489	0.3337	0.3882	97.42	33.72	129.8	2.092
4079	26.91	44.93	72.41	3.9	11.58	21.52	3.3	0.4785	3.411	0.2088	143.2	0.2803	0.3338	0.3899	97.52	34.44	130.6	2.171
4080	26.75	44.41	72.55	3.941	11.61	21.4	3.283	0.4666	3.342	0.2061	145.6	0.3193	0.3358	0.3798	98.87	36.72	135.7	2.15
4082	26.9	44.52	72.5	4.006	11.6	21.73	3.334	0.4843	3.428	0.2117	155.3	0.3194	0.3363	0.395	97.06	34.11	129.3	2.172
4086	27.06	44.71	72.35	3.901	11.58	21.47	3.291	0.4849	3.318	0.209	146.6	0.3777	0.3331	0.3863	98.19	34.26	131.6	2.029
4087	27.19	45.09	71.86	3.871	11.5	21.29	3.266	0.5124	3.263	0.2038	148.1	0.3708	0.3343	0.3929	98.26	34.12	132	1.949
4088	26.92	44.62	72.3	3.9	11.57	21.4	3.283	0.5026	3.331	0.2136	147.7	0.3241	0.3392	0.3958	97.45	35.46	131.8	1.981
4089	26.79	44.49	72.39	3.975	11.58	21.52	3.303	0.4861	3.32	0.2078	145	0.3417	0.3366	0.3984	98.29	36.34	134.4	2.037
4095	26.89	44.74	72.34	3.984	11.57	21.45	3.292	0.4816	3.341	0.2115	150.9	0.391	0.338	0.4018	98.03	34.82	132	2.055
4096	26.97	44.56	72.44	3.998	11.59	21.67	3.323	0.4841	3.315	0.2144	146.4	0.339	0.332	0.3871	97.27	34	129.6	2.023
4097	26.93	44.62	72.42	3.958	11.59	21.53	3.304	0.4916	3.366	0.2006	143.7	0.3404	0.3365	0.4034	98.79	32.55	131.7	2.125
4099	26.68	44.14	72.62	3.899	11.62	21.6	3.317	0.5013	3.325	0.2132	158.4	0.375	0.3409	0.4126	100.1	34.5	135.9	1.959
4101	26.63	44.49	72.62	3.88	11.61	21.31	3.274	0.4841	3.266	0.2068	151.1	0.3536	0.34	0.3945	100.28	37.83	139.1	2
4102	26.5	44.07	72.73	3.897	11.63	21.35	3.278	0.4701	3.333	0.206	150.5	0.3064	0.3324	0.3819	101.28	39.42	143.4	2.095
4108	26.77	44.5	72.45	3.953	11.59	21.46	3.292	0.4676	3.323	0.2003	145	0.3934	0.3337	0.3863	99.47	36.7	136.7	2.113
4109	27.05	44.68	72.35	3.95	11.58	21.59	3.314	0.4813	3.399	0.2142	150.4	0.3441	0.3391	0.3942	97.25	35.07	130.8	2.146
4110	26.77	44.66	72.43	3.896	11.59	21.54	3.302	0.5057	3.4	0.209	145.3	0.3292	0.3313	0.3826	99.34	34.62	134.7	2.066
4112	26.69	44.26	72.56	3.987	11.61	21.57	3.308	0.4598	3.321	0.2062	142.6	0.3587	0.3307	0.3799	99.46	35.74	135.1	2.091
4115	26.93	44.49	72.39	3.927	11.58	21.37	3.279	0.4824	3.363	0.2149	152.3	0.3755	0.3376	0.3954	99.13	36.66	135.5	2.03
4116	26.81	44.43	72.47	3.922	11.59	21.45	3.29	0.4713	3.366	0.2088	148.3	0.34	0.3337	0.3976	98.26	36.02	133.7	2.159
5001	27.13	44.65	72.19	3.965	11.55	21.52	3.295	0.5227	3.318	0.2033	154.8	0.3968	0.3347	0.391	95.73	35.99	129.9	2.019
5002	27.28	44.84	71.9	3.833	11.51	21.11	3.237	0.5454	3.259	0.2101	160.8	0.3097	0.3367	0.381	100.22	38.4	139.9	1.907
5003	26.44	43.86	72.85	3.806	11.65	21.17	3.247	0.5054	3.215	0.1977	147	0.3251	0.3289	0.3832	102.34	43.79	149.5	1.925
5005	26.81	44.31	72.68	3.955	11.62	21.62	3.317	0.5095	3.245	0.209	146.1	0.5274	0.3409	0.399	98.18	33.64	131.1	1.948
5006	26.87	44.67	72.17	4.113	11.55	21.51	3.299	0.4964	3.342	0.2045	150.3	0.322	0.3311	0.3915	98.27	32.34	129.3	2.045
5007	26.92	44.43	72.38	3.955	11.58	21.48	3.3	0.4849	3.422	0.2031	147.9	0.3553	0.34	0.3939	98.67	35.09	133.7	2.127
5008	26.98	44.63	72.24	3.902	11.56	21.48	3.297	0.4961	3.295	0.2133	148	0.3752	0.331	0.3849	98.42	34.48	131.8	1.977
5009	27.13	44.74	72.06	3.907	11.52	21.42	3.285	0.5032	3.292	0.2128	153.6	0.3755	0.3376	0.394	97.33	36.52	132.1	2.005
5010	26.56	44.1	73	3.825	11.68	21.35	3.269	0.5424	3.498	0.2155	150.5	0.3725	0.3445	0.3991	99.08	38.35	138.4	2.032
5012	26.94	44.43	72.4	3.969	11.59	21.46	3.293	0.512	3.41	0.2089	146.9	0.3349	0.3393	0.3971	99.46	35.33	135.5	2.087
5013	26.96	44.41	72.04	3.835	11.53	21.22	3.255	0.5247	3.283	0.2111	163	0.3195	0.3295	0.3817	99.27	38.02	138	1.947
5014	26.96	44.55	72.26	3.891	11.56	21.42	3.288	0.4791	3.302	0.2164	153.6	0.348	0.3373	0.3903	98.67	36.34	135.2	1.976
5015	26.59	43.97	72.63	4.021	11.61	21.79	3.345	0.4747	3.437	0.2095	151.6	0.4156	0.3285	0.3945	98.08	35.38	133.3	2.168
5016	27.01	44.61	72.11	3.898	11.54	21.33	3.273	0.4802	3.314	0.2092	153.1	0.3732	0.3338	0.384	98.48	37.47	135.6	2.037
5017	27.37	44.51	71.9	4.002	11.51	21.48	3.303	0.5131	3.34	0.213	144.5	0.4474	0.3399	0.4146	97.92	33.96	130.6	1.999
5018	26.89	44.71	72.3	3.904	11.57	21.4	3.284	0.4731	3.276	0.2073	145.7	0.4022	0.3367	0.3831	97.59	38.18	134.9	2.035
5019	26.92	44.24	72.44	4.034	11.59	21.47	3.301	0.493	3.356	0.2169	141.4	0.3889	0.335	0.3877	98.44	33.93	132.1	2.011
5020	26.85	44.33	72.56	3.965	11.62	21.17	3.252	0.4978	3.309	0.196	144.4	0.3785	0.3292	0.3784	98.03	38.08	135.7	2.026
5021	26.67	44.19	72.6	3.841	11.62	21.51	3.298	0.4701	3.305	0.2158	140.1	0.4002	0.34	0.3947	97.14	33.95	129.7	2.037
5022	26.98	44.51	72.19	3.937	11.55	21.37	3.277	0.5232	3.302	0.2205	165.8	0.3431	0.3356	0.3961	96.73	35.75	131	1.947
5023	26.7	44.2	72.59	4.054	11.61	21.68	3.323	0.4799	3.394	0.2069	140.7	0.3944	0.3329	0.3887	97.88	32.68	129.5	2.132
5024	26.9	44.64	72.35	3.862	11.58	21.23	3.263	0.4621	3.27	0.2063	147.3	0.3506	0.3327	0.3788	100.12	38.98	140.4	2.078
5025	26.95	44.51	72.1	3.835	11.53	21.11	3.244	0.5215	3.184	0.2017	156.5	0.39	0.3265	0.3712	98.41	39.84	138.1	1.861
5027	27.2	44.64	72.07	3.907	11.53	21.64	3.326	0.5138	3.312	0.2177	151.2	0.4592	0.3405	0.4044	95.05	32.15	124.7	1.92
5028	27.07	44.79	71.9	4.058	11.51	21.53	3.303	0.4984	3.408	0.2114	143.1	0.3453	0.3421	0.4011	94.53	36.69	128.4	2.062
5029	26.98	44.64	72.18	4.128	11.54	21.73	3.341	0.482	3.365	0.2101	140.7	0.4729	0.3307	0.3948	96.31	34.15	128.4	2.1
5030	26.95	44.65	72.25	4.017	11.56	21.49	3.299	0.4748	3.269	0.2028	144.7	0.4929	0.3347	0.3937	97.35	36.27	132.3	2.042
5031	26.76	44.3	72.36	3.866	11.58	21.1	3.242	0.4694	3.42	0.2029	155.8	0.3474	0.3359	0.3807	97.53	40.18	137.1	2.188
5032	27.04	44.51	72.39	3.833	11.57	21.47	3.292	0.5225	3.385	0.2133	150.2	0.3531	0.3435	0.401	98.58	33.88	132.3	2.032
5033	27.23	44.44	71.87	3.766	11.5	21.09	3.241	0.5243	3.298	0.208	171.9	0.3822	0.3412	0.3998	98.08	43.13	141	1.972
5034	27.09	44.78	71.84	3.898	11.49	21.5	3.302	0.4921	3.287	0.2128	147.8	0.4024	0.3396	0.4039	95.48	36.67	129.4	2.026
5035	27.22	44.65	71.74	3.959	11.48	21.41	3.285	0.5558	3.277	0.2216	160.8	0.4279	0.3403	0.3995	97.84	37.12	134.1	1.842
5037	27.08	44.72	72.32	3.897	11.57	21.45	3.291	0.4916	3.343	0.209	151.1	0.4034	0.3347	0.3844	97.32	35.4	131.7	2.073
5038	26.94	44.75	72.18	3.87	11.55	21.1	3.241	0.4769	3.241	0.2004	155.4	0.4537	0.3408	0.3883	97.97	39.21	136.5	1.992
5039	27.03	44.65	72.16	3.958	11.55	21.38	3.28	0.5245	3.298	0.2052	152.7	0.4221	0.3376	0.3947	97.8	37.07	133.1	1.998
5040	26.76	44.18	72.49	3.904	11.6	21.42	3.294	0.4966	3.367	0.2032	147.9	0.3416	0.3332	0.378	101.12	39.17	143.1	2.067
5043	26.84	44.4	72.12	3.893	11.55	21.25	3.26	0.5142	3.284	0.2223	155.8	0.4355	0.3356	0.4074	97.86	37.69	135	1.965
5044	27.32	44.74	71.8	3.87	11.49	21.37	3.284	0.5027	3.311	0.2144	149.4	0.3799	0.3323	0.387	96.4	36.05	130.7	1.997
5045	27.24	44.46	71.78	3.793	11.48	21.22	3.256	0.4873	3.311	0.2154	161.3	0.3327	0.3344	0.3796	96.76	36.44	131.6	1.991
5046	26.91	44.59	72.4	4.004	11.59	21.74	3.332	0.5348	3.315	0.2093	148.8	0.422	0.3328	0.3777	96.09	32.29	126	1.955
5047	26.6	43.93	72.31	3.992	11.57	21.48	3.299	0.5191	3.291	0.2107	145.7	0.4383	0.3302	0.3965	98.31	35.39	133.2	1.973
5048	26.51	43.97	72.73	3.91	11.65	21.31	3.275	0.4947	3.356	0.1973	146.7	0.3361	0.3405	0.387	103.39	39.72	146.6	2.089
5049	27.02	44.41	72.1	3.935	11.54	21.3	3.271	0.5195	3.283	0.2114	146.3	0.4279	0.3474	0.412	101.1	37.04	139.7	1.959
5051	26.73	44.39	72.37	4.023	11.58	21.44	3.298	0.481	3.379	0.2092	142.6	0.3856	0.3319	0.3876	99.11	36.59	135.7	2.076
5052	27.55	45.04	71.81	3.823	11.49	21.37	3.282	0.5028	3.358	0.2214	157.8	0.3361	0.3327	0.3922	96.06	34.6	127.8	2.035
5054	27.08	44.62	72.21	3.883	11.56	21.35	3.282	0.491	3.317	0.2083	150.5	0.3902	0.3366	0.3833	98.25	36.91	135.2	2.014
5055	27.61	45.07	71.56	3.947	11.45	21.49	3.305	0.4521	3.353	0.2268	154.1	0.3583	0.3408	0.3857	97.47	34.1	130.3	2.094
5056	27.18	44.6	71.65	4.139	11.47	21.52	3.304	0.5167	3.297	0.2256	147	0.4748	0.349	0.4152	97.88	33.29	130.6	1.922
5057	26.76	44.63	72.24	4.037	11.56	21.55	3.313	0.4724	3.411	0.2149	143.5	0.3453	0.3287	0.3792	99.99	37.03	137.7	2.14
5058	26.78	44.43	72.28	4.044	11.57	21.43	3.292	0.4899	3.348	0.2076	148.6	0.3906	0.3424	0.4024	98.89	35.73	134.2	2.046
5060	27.75	45.35	71.62	3.755	11.46	21.27	3.267	0.4936	3.382	0.2345	158.1	0.3535	0.3368	0.4008	97.26	33.17	128.3	2.027
5061	26.72	44.77	72.58	4.045	11.61	21.64	3.323	0.524	3.399	0.2155	145.8	0.4471	0.3392	0.4098	98.97	34.66	133.8	2.002
5062	26.86	44.23	72.25	3.968	11.56	21.58	3.312	0.5129	3.434	0.2137	151.5	0.3448	0.3356	0.3872	97.16	36.78	132.8	2.054
5063	26.75	44.61	72.1	4.61	11.53	21.7	3.327	0.5408	3.436	0.2126	146.6	0.3056	0.3369	0.3984	99.58	35.29	135.6	2.056
5064	26.9	44.75	72.36	3.916	11.58	21.73	3.329	0.5235	3.307	0.2154	151.7	0.4639	0.3307	0.4086	98.55	34.43	132.3	1.96
5065	26.73	43.86	72.69	3.964	11.63	21.45	3.284	0.5207	3.395	0.2179	156.7	0.3344	0.3466	0.4036	103.29	38.84	144.8	2.023
5066	26.79	44.51	72.55	3.873	11.61	21.46	3.295	0.4654	3.287	0.2056	148	0.394	0.3352	0.3787	98.48	39	137	2.081
5067	26.78	44.75	72.52	4.008	11.61	21.47	3.3	0.5054	3.348	0.2139	147.9	0.3429	0.3348	0.388	102.36	34.63	138.8	1.964
5068	26.57	44.14	73.26	3.941	11.73	21.81	3.342	0.4872	3.431	0.2014	139	0.3699	0.3222	0.3771	100.14	35.27	136.9	2.143
5069	26.94	44.51	72.39	3.947	11.59	21.49	3.296	0.5084	3.348	0.217	148.4	0.3798	0.3351	0.3921	99.78	36.02	136.8	2.011
5070	26.27	44.15	72.85	4.008	11.66	21.54	3.299	0.4627	3.327	0.2066	140.9	0.3835	0.332	0.3853	99.05	39.01	138.4	2.08
5071	26.6	44.55	72.91	4.06	11.66	21.7	3.327	0.4938	3.426	0.2051	141.7	0.3087	0.324	0.3735	99.74	37.79	138.4	2.115
5072	26.91	44.4	72.48	4.098	11.6	21.7	3.328	0.4866	3.301	0.2239	142.6	0.4666	0.3399	0.3946	98.02	33.04	130.5	1.978
5073	26.72	44.59	72.43	3.901	11.59	21.44	3.295	0.5116	3.332	0.2142	147.8	0.3614	0.3295	0.3795	99.28	36.43	136.5	1.999
5074	26.87	44.78	72.2	3.903	11.56	21.48	3.299	0.5117	3.372	0.2056	160.2	0.3496	0.3341	0.3883	97.55	33.04	129	2.041
5075	26.97	44.93	72.25	3.929	11.56	21.34	3.275	0.4923	3.238	0.2095	157.3	0.4226	0.3351	0.3795	99.78	38.71	139.6	1.928
5076	27.21	44.49	72.08	3.9	11.54	21.42	3.29	0.5295	3.328	0.219	155.3	0.4009	0.3312	0.3905	97.19	35.83	131.3	1.977
5077	26.58	44.21	72.96	3.992	11.67	21.6	3.31	0.521	3.275	0.2102	145.9	0.4897	0.3464	0.3978	100.55	32.37	134.1	1.949
5078	27.07	44.73	72.3	3.978	11.57	21.52	3.304	0.515	3.34	0.2146	147.6	0.3192	0.3353	0.384	99.47	33.43	133.1	2.024
5079	26.44	43.98	72.67	4.044	11.64	21.57	3.303	0.5072	3.324	0.2116	151.2	0.3204	0.336	0.3922	99.93	41.06	142.3	1.992
5080	26.83	44.56	72.31	3.909	11.57	21.25	3.261	0.4863	3.355	0.2079	150.1	0.3216	0.3331	0.3761	97.63	39.08	136.5	2.065
5081	26.73	44.33	72.8	3.749	11.65	21.19	3.248	0.53	3.243	0.1992	150.2	0.4497	0.339	0.3946	100.01	38.69	140.6	1.951
5082	26.78	44.46	72.82	4.061	11.65	21.65	3.319	0.4713	3.337	0.2072	142	0.4718	0.346	0.4022	99.61	34.97	134.8	2.097
5083	26.48	44.11	72.88	4.05	11.66	21.52	3.3	0.496	3.377	0.2117	142.8	0.3818	0.3422	0.4029	98.03	37.75	135.1	2.044
5084	26.49	43.78	72.77	3.93	11.64	21.47	3.295	0.4585	3.332	0.2077	143	0.4175	0.3422	0.3924	101.2	37.42	140.9	2.078
5085	26.9	44.46	72.36	4.02	11.58	21.44	3.286	0.4942	3.385	0.2083	152.3	0.364	0.337	0.396	98.1	36.08	133.9	2.111
5086	27.13	44.87	72.31	4.025	11.57	21.78	3.34	0.5285	3.395	0.215	145.1	0.4471	0.3361	0.4015	96.56	30.58	125.1	2.016
5087	26.74	44.65	72.51	4.038	11.6	21.54	3.309	0.4904	3.331	0.2189	145	0.4218	0.3405	0.4019	100.46	34.62	136.1	1.985
5088	27.06	44.66	72.12	3.901	11.54	21.31	3.273	0.466	3.334	0.2078	143.9	0.4019	0.3323	0.3824	97.16	39.16	135.8	2.104
5089	26.8	44.09	72.71	3.967	11.63	21.31	3.268	0.4972	3.291	0.202	154.9	0.394	0.3321	0.3757	99.63	44.07	145.8	2.001
5090	26.59	44.01	73	3.846	11.67	21.26	3.257	0.4707	3.298	0.2022	148.2	0.3702	0.3253	0.3716	102.4	47.13	152.5	2.109
5092	27.3	44.71	72.41	3.87	11.58	21.74	3.326	0.5124	3.34	0.2126	143.4	0.4724	0.3309	0.3862	98.97	32.28	131.3	2.016
5093	27.1	45.15	71.9	3.856	11.51	21.43	3.285	0.5101	3.172	0.2185	145.9	0.4666	0.3362	0.3878	97.41	31.41	127.3	1.858
5095	27.4	45.06	72.01	3.85	11.52	21.56	3.311	0.5047	3.375	0.2147	153.6	0.318	0.3306	0.3806	96.55	33.07	128.3	2.044
5096	27.05	44.62	72.02	3.903	11.52	21.39	3.286	0.4798	3.299	0.2112	149.4	0.3456	0.3286	0.3767	98.29	36.15	134.4	1.993
5097	26.5	44.28	72.57	3.915	11.61	21.35	3.28	0.4936	3.337	0.2011	154.1	0.279	0.3251	0.38	101.85	38.32	142.5	2.069
5098	26.57	44.38	72.4	4.028	11.57	21.6	3.306	0.4823	3.362	0.2112	144.6	0.3699	0.3346	0.3845	99.08	35.68	134.7	2.063
5099	26.64	44.09	72.59	3.894	11.61	21.35	3.279	0.5302	3.259	0.2078	150.5	0.3625	0.3348	0.3908	101.44	38.66	142.6	1.935
5100	27.06	44.88	72.48	3.895	11.61	21.55	3.304	0.5311	3.427	0.2084	148.5	0.3585	0.3367	0.4011	97.13	32.81	128.4	2.063
5101	26.83	44.53	72.61	3.957	11.62	21.46	3.289	0.525	3.413	0.2204	156.5	0.3286	0.3489	0.4038	98.31	36.19	134.5	1.991
5102	26.47	44.29	72.61	3.81	11.62	21.32	3.267	0.4556	3.188	0.2075	141.2	0.3908	0.3278	0.3729	101.12	40.82	144.4	1.922
5103	26.72	44.23	72.49	3.909	11.59	21.4	3.283	0.4941	3.296	0.2071	157	0.3824	0.3343	0.3815	102.18	37.06	141.3	2.049
5104	26.76	44.54	72.82	3.878	11.66	21.67	3.319	0.4878	3.285	0.2013	146.1	0.4041	0.327	0.3806	98.48	38.86	137.4	2.029
5105	26.77	44.58	72.68	3.895	11.62	21.58	3.309	0.4882	3.322	0.2059	147.5	0.4631	0.3318	0.3826	97.74	37.03	134.1	2.079
5108	26.86	44.51	72.24	4.09	11.56	21.42	3.285	0.5269	3.414	0.208	151.5	0.2887	0.3386	0.3998	97.66	38.19	135.7	2.03
5109	26.93	44.34	72.31	3.863	11.57	21.24	3.263	0.4998	3.349	0.1988	146.9	0.3311	0.3304	0.3716	97.89	39.1	136.7	2.089
5110	26.3	44.23	73.08	3.901	11.69	21.15	3.25	0.4724	3.332	0.1949	141.7	0.3516	0.331	0.3749	102.69	42.97	149.2	2.156
5111	26.69	44.34	72.49	3.818	11.6	21.44	3.291	0.5038	3.331	0.2171	150.6	0.429	0.3349	0.4087	98.99	36.6	136.1	1.988
5112	27.03	44.96	72.23	4.067	11.56	21.8	3.34	0.5018	3.382	0.2206	149.2	0.4021	0.3453	0.4038	95.25	32.03	123.9	2.052
5113	27.08	44.58	72.55	3.991	11.61	21.57	3.314	0.5337	3.471	0.2133	144.2	0.3606	0.33	0.3735	99.47	34.26	133.9	2.061
5114	26.97	44.46	72.41	3.953	11.59	21.44	3.288	0.5203	3.357	0.2122	155.6	0.3596	0.3365	0.4119	97.09	35.09	130.5	1.97
5115	27.15	44.76	72.33	3.798	11.57	21.38	3.276	0.4546	3.319	0.2268	150.1	0.4092	0.3357	0.3994	98.6	35.28	133.7	2.04
5116	26.65	44.55	72.64	3.84	11.62	21.17	3.247	0.4646	3.326	0.2096	151.4	0.3353	0.3404	0.4146	99.21	40.66	140.9	2.055
5117	26.48	44.32	72.83	3.843	11.65	21.29	3.27	0.4653	3.326	0.2048	141.5	0.3103	0.3318	0.3767	100.22	38.89	141.2	2.102
5119	26.63	44.44	72.74	3.841	11.64	21.46	3.296	0.4818	3.442	0.2035	146.7	0.3373	0.331	0.383	101.49	38.97	143.1	2.153
5120	26.79	44.27	72.68	4.004	11.62	21.62	3.314	0.4945	3.346	0.2133	143.9	0.4065	0.339	0.3931	96.48	35.11	129.1	2.04
